# Supplementary material for: Doctors on the move: a European case study on the key characteristics of national recertification systems
Source: PubMed Central journal article supplement — BMJ Open. 2018 Apr 17;8(4):e019963. doi: 10.1136/bmjopen-2017-019963 (PMC5905769; doi:10.1136/bmjopen-2017-019963), 2018-04-17
Supplement: bmjopen-2017-019963.draft_revisions.pdf [file bmjopen-2017-019963.draft_revisions.pdf]

# BMJ Open

BMJ Open is committed to open peer review. As part of this commitment we make the peer review history of every article we publish publicly available.

When an article is published we post the peer reviewers' comments and the authors' responses online. We also post the versions of the paper that were used during peer review. These are the versions that the peer review comments apply to.

The versions of the paper that follow are the versions that were submitted during the peer review process. They are not the versions of record or the final published versions. They should not be cited or distributed as the published version of this manuscript.

BMJ Open is an open access journal and the full, final, typeset and author-corrected version of record of the manuscript is available on our site with no access controls, subscription charges or pay-per-view fees (<http://bmjopen.bmj.com>).

If you have any questions on BMJ Open's open peer review process please email [info.bmjopen@bmj.com](mailto:info.bmjopen@bmj.com)

# BMJ Open

## Doctors on the move: international study on national recertification systems

|                                 |                                                                                                                                                                                                                                                                                                                                                                                                                                                                                                                                                                                                                                    |
|---------------------------------|------------------------------------------------------------------------------------------------------------------------------------------------------------------------------------------------------------------------------------------------------------------------------------------------------------------------------------------------------------------------------------------------------------------------------------------------------------------------------------------------------------------------------------------------------------------------------------------------------------------------------------|
| Journal:                        | <i>BMJ Open</i>                                                                                                                                                                                                                                                                                                                                                                                                                                                                                                                                                                                                                    |
| Manuscript ID                   | bmjopen-2017-019963                                                                                                                                                                                                                                                                                                                                                                                                                                                                                                                                                                                                                |
| Article Type:                   | Research                                                                                                                                                                                                                                                                                                                                                                                                                                                                                                                                                                                                                           |
| Date Submitted by the Author:   | 05-Oct-2017                                                                                                                                                                                                                                                                                                                                                                                                                                                                                                                                                                                                                        |
| Complete List of Authors:       | Sehlbach, Carolin; Maastricht University - Location Randwyck, Department of Educational Research and Development<br>Govaerts, MJ; Maastricht University, Department of Educational Research and Development<br>Mitchell, Sharon; European Respiratory Society, Education<br>Rohde, Gernot; Johann Wolfgang Goethe University Hospital, Respiratory Medicine<br>Smeenk, Frank; Department of Respiratory Medicine, Catharina Hospital; Maastricht University - Location Randwyck, Department of Educational Research and Development<br>Driessen, Erik ; Maastricht University , Department of Educational Research and Development |
| <b>Primary Subject Heading</b>: | Medical education and training                                                                                                                                                                                                                                                                                                                                                                                                                                                                                                                                                                                                     |
| Secondary Subject Heading:      | Medical education and training                                                                                                                                                                                                                                                                                                                                                                                                                                                                                                                                                                                                     |
| Keywords:                       | Recertification, Continuing Professional Development, Performance assessment, Patient safety, Quality assurance, Professional mobility                                                                                                                                                                                                                                                                                                                                                                                                                                                                                             |
|                                 |                                                                                                                                                                                                                                                                                                                                                                                                                                                                                                                                                                                                                                    |

SCHOLARONE™  
Manuscripts

1  
2  
3 **1 Doctors on the move: international study on national recertification systems**

4  
5 **2 A collective case study**

6  
7  
8 C Sehlbach, MJB Govaerts, S Mitchell, GGU Rohde, FWJM Smeenk, EW Driessen

9  
10 - Carolin Sehlbach, PhD student, Maastricht University, Faculty of Health, Medicine  
11 and Life Sciences, Educational Development and Research, 6229 ER Maastricht, The  
12 Netherlands

13  
14  
15 - Marjan J B Govaerts, Associate professor, Maastricht University, Faculty of Health,  
16 Medicine and Life Sciences, Educational Development and Research, 6229 ER Maas-  
17 tricht, The Netherlands

18  
19  
20 - Sharon Mitchell, Educational Standards Manager, European Respiratory Society, De-  
21 partment of Education, 1003 Lausanne, Switzerland

22  
23  
24 - Gernot G U Rohde, Professor, Johann Wolfgang Goethe University Hospital, Respira-  
25 tory Medicine, 60590 Frankfurt am Main, Germany

26  
27  
28 - Frank W J M Smeenk, Professor, Catharina Hospital, Respiratory Medicine, 5623 EJ  
29 Eindhoven, The Netherlands

30  
31  
32 - Erik W Driessen; Professor, Maastricht University, Faculty of Health, Medicine and  
33 Life Sciences, Educational Development and Research, 6229 ER Maastricht, The  
34 Netherlands

35  
36  
37  
38  
39  
40  
41  
42  
43  
44  
45 **Corresponding author:** Carolin Sehlbach, MSc, PhD Student, Maastricht University, Facul-  
46 ty of Health, Medicine and Life Sciences, Educational Development and Research, Universi-  
47 teitssingel 60, 6229 ER Maastricht, The Netherlands

48  
49 ([carolin.sehlbach@maastrichtuniversity.nl](mailto:carolin.sehlbach@maastrichtuniversity.nl))

50 T +31 433881628

51  
52  
53 Word count: 2.932 words

54  
55  
56  
57  
58  
59  
60  
61  
62  
63  
64  
65  
66  
67  
68  
69  
70  
71  
72  
73  
74  
75  
76  
77  
78  
79  
80  
81  
82  
83  
84  
85  
86  
87  
88  
89  
90  
91  
92  
93  
94  
95  
96  
97  
98  
99  
100  
101  
102  
103  
104  
105  
106  
107  
108  
109  
110  
111  
112  
113  
114  
115  
116  
117  
118  
119  
120  
121  
122  
123  
124  
125  
126  
127  
128  
129  
130  
131  
132  
133  
134  
135  
136  
137  
138  
139  
140  
141  
142  
143  
144  
145  
146  
147  
148  
149  
150  
151  
152  
153  
154  
155  
156  
157  
158  
159  
160  
161  
162  
163  
164  
165  
166  
167  
168  
169  
170  
171  
172  
173  
174  
175  
176  
177  
178  
179  
180  
181  
182  
183  
184  
185  
186  
187  
188  
189  
190  
191  
192  
193  
194  
195  
196  
197  
198  
199  
200  
201  
202  
203  
204  
205  
206  
207  
208  
209  
210  
211  
212  
213  
214  
215  
216  
217  
218  
219  
220  
221  
222  
223  
224  
225  
226  
227  
228  
229  
230  
231  
232  
233  
234  
235  
236  
237  
238  
239  
240  
241  
242  
243  
244  
245  
246  
247  
248  
249  
250  
251  
252  
253  
254  
255  
256  
257  
258  
259  
260  
261  
262  
263  
264  
265  
266  
267  
268  
269  
270  
271  
272  
273  
274  
275  
276  
277  
278  
279  
280  
281  
282  
283  
284  
285  
286  
287  
288  
289  
290  
291  
292  
293  
294  
295  
296  
297  
298  
299  
300  
301  
302  
303  
304  
305  
306  
307  
308  
309  
310  
311  
312  
313  
314  
315  
316  
317  
318  
319  
320  
321  
322  
323  
324  
325  
326  
327  
328  
329  
330  
331  
332  
333  
334  
335  
336  
337  
338  
339  
340  
341  
342  
343  
344  
345  
346  
347  
348  
349  
350  
351  
352  
353  
354  
355  
356  
357  
358  
359  
360  
361  
362  
363  
364  
365  
366  
367  
368  
369  
370  
371  
372  
373  
374  
375  
376  
377  
378  
379  
380  
381  
382  
383  
384  
385  
386  
387  
388  
389  
390  
391  
392  
393  
394  
395  
396  
397  
398  
399  
400  
401  
402  
403  
404  
405  
406  
407  
408  
409  
410  
411  
412  
413  
414  
415  
416  
417  
418  
419  
420  
421  
422  
423  
424  
425  
426  
427  
428  
429  
430  
431  
432  
433  
434  
435  
436  
437  
438  
439  
440  
441  
442  
443  
444  
445  
446  
447  
448  
449  
450  
451  
452  
453  
454  
455  
456  
457  
458  
459  
460  
461  
462  
463  
464  
465  
466  
467  
468  
469  
470  
471  
472  
473  
474  
475  
476  
477  
478  
479  
480  
481  
482  
483  
484  
485  
486  
487  
488  
489  
490  
491  
492  
493  
494  
495  
496  
497  
498  
499  
500  
501  
502  
503  
504  
505  
506  
507  
508  
509  
510  
511  
512  
513  
514  
515  
516  
517  
518  
519  
520  
521  
522  
523  
524  
525  
526  
527  
528  
529  
530  
531  
532  
533  
534  
535  
536  
537  
538  
539  
540  
541  
542  
543  
544  
545  
546  
547  
548  
549  
550  
551  
552  
553  
554  
555  
556  
557  
558  
559  
560  
561  
562  
563  
564  
565  
566  
567  
568  
569  
570  
571  
572  
573  
574  
575  
576  
577  
578  
579  
580  
581  
582  
583  
584  
585  
586  
587  
588  
589  
590  
591  
592  
593  
594  
595  
596  
597  
598  
599  
600  
601  
602  
603  
604  
605  
606  
607  
608  
609  
610  
611  
612  
613  
614  
615  
616  
617  
618  
619  
620  
621  
622  
623  
624  
625  
626  
627  
628  
629  
630  
631  
632  
633  
634  
635  
636  
637  
638  
639  
640  
641  
642  
643  
644  
645  
646  
647  
648  
649  
650  
651  
652  
653  
654  
655  
656  
657  
658  
659  
660  
661  
662  
663  
664  
665  
666  
667  
668  
669  
670  
671  
672  
673  
674  
675  
676  
677  
678  
679  
680  
681  
682  
683  
684  
685  
686  
687  
688  
689  
690  
691  
692  
693  
694  
695  
696  
697  
698  
699  
700  
701  
702  
703  
704  
705  
706  
707  
708  
709  
710  
711  
712  
713  
714  
715  
716  
717  
718  
719  
720  
721  
722  
723  
724  
725  
726  
727  
728  
729  
730  
731  
732  
733  
734  
735  
736  
737  
738  
739  
740  
741  
742  
743  
744  
745  
746  
747  
748  
749  
750  
751  
752  
753  
754  
755  
756  
757  
758  
759  
760  
761  
762  
763  
764  
765  
766  
767  
768  
769  
770  
771  
772  
773  
774  
775  
776  
777  
778  
779  
780  
781  
782  
783  
784  
785  
786  
787  
788  
789  
790  
791  
792  
793  
794  
795  
796  
797  
798  
799  
800  
801  
802  
803  
804  
805  
806  
807  
808  
809  
810  
811  
812  
813  
814  
815  
816  
817  
818  
819  
820  
821  
822  
823  
824  
825  
826  
827  
828  
829  
830  
831  
832  
833  
834  
835  
836  
837  
838  
839  
840  
841  
842  
843  
844  
845  
846  
847  
848  
849  
850  
851  
852  
853  
854  
855  
856  
857  
858  
859  
860  
861  
862  
863  
864  
865  
866  
867  
868  
869  
870  
871  
872  
873  
874  
875  
876  
877  
878  
879  
880  
881  
882  
883  
884  
885  
886  
887  
888  
889  
890  
891  
892  
893  
894  
895  
896  
897  
898  
899  
900  
901  
902  
903  
904  
905  
906  
907  
908  
909  
910  
911  
912  
913  
914  
915  
916  
917  
918  
919  
920  
921  
922  
923  
924  
925  
926  
927  
928  
929  
930  
931  
932  
933  
934  
935  
936  
937  
938  
939  
940  
941  
942  
943  
944  
945  
946  
947  
948  
949  
950  
951  
952  
953  
954  
955  
956  
957  
958  
959  
960  
961  
962  
963  
964  
965  
966  
967  
968  
969  
970  
971  
972  
973  
974  
975  
976  
977  
978  
979  
980  
981  
982  
983  
984  
985  
986  
987  
988  
989  
990  
991  
992  
993  
994  
995  
996  
997  
998  
999  
1000

1  
2  
3 29 Copyright: The Corresponding Author has the right to grant on behalf of all authors and does  
4  
5 30 grant on behalf of all authors, an exclusive licence on a worldwide basis to the BMJ Publish-  
6  
7 31 ing Group Ltd to permit this article (if accepted) to be published in BMJ editions and any oth-  
8  
9  
10 32 er BMJ PGL products and sublicenses such use and exploit all subsidiary rights, as set out in  
11  
12 33 our licence.  
13  
14  
15  
16  
17  
18  
19  
20  
21  
22  
23  
24  
25  
26  
27  
28  
29  
30  
31  
32  
33  
34  
35  
36  
37  
38  
39  
40  
41  
42  
43  
44  
45  
46  
47  
48  
49  
50  
51  
52  
53  
54  
55  
56  
57  
58  
59  
60

1  
2  
3 34 **Doctors on the move: international study on national recertification systems**  
4

5 35 **A collective case study**  
6  
7

8 36 **ABSTRACT**  
9

10 37 **Objectives:** With increased cross-border movement, ensuring safe and high-quality healthcare  
11  
12 38 has gained primacy. The purpose of recertification is to ensure quality of care through period-  
13  
14 39 ically attesting doctors' professional proficiency in their field. Professional migration and  
15  
16 40 facilitated cross-border recognition of qualifications, however, make us question the fitness of  
17  
18 41 national policies for safeguarding patient care and the international accountability of doctors.  
19

20  
21 42 **Design and setting:** We performed document analyses and conducted semi-structured inter-  
22  
23 43 views to identify and describe key characteristics and effective components of 10 different  
24  
25 44 European recertification systems, each representing one case (collective case study). We sub-  
26  
27 45 sequently compared these systems to explore similarities and differences in terms of assess-  
28  
29 46 ment criteria used to determine process quality.  
30  
31

32  
33 47 **Results:** Great variety existed between countries in terms and assessment formats used, tar-  
34  
35 48 geting cognition, competence and performance (Miller's assessment pyramid). Recertification  
36  
37 49 procedures and requirements also varied significantly, ranging from voluntary participation in  
38  
39 50 professional development modules to the mandatory collection of multiple performance data  
40  
41 51 in a competency-based portfolio. Knowledge assessment was fundamental to recertification in  
42  
43 52 most countries. Another difference concerned the stakeholders involved in the recertification  
44  
45 53 process: while some systems exclusively relied on doctors' self-assessment, others involved  
46  
47 54 multiple stakeholders but rarely included patients in assessment of doctors' professional com-  
48  
49 55 petence. Differences between systems partly reflected different goals and primary purposes of  
50  
51 52 recertification.  
52  
53 56

54  
55 57 **Conclusion:** Recertification systems differ substantially internationally with regard to the  
56  
57 58 criteria they apply to assess doctors' competence, their aims, requirements, assessment for-  
58  
59  
60

1  
2  
3 59 mats, and patient involvement. In the light of professional mobility and associated demands  
4  
5 60 for accountability, we recommend that competence assessment include patients' perspectives,  
6  
7 61 and recertification practices be shared internationally to enhance transparency. This can help  
8  
9 62 facilitate cross-border movement, while guaranteeing high-quality patient care.  
10  
11  
12 63

13  
14 64 Word count: 276  
15  
16  
17 65

18  
19 66 **Key words:** Recertification; Continuing Professional Development; Performance assessment;  
20  
21 67 Patient safety; Quality assurance; Professional mobility  
22  
23 68

24  
25 69 **Strengths and limitations of this study**  
26  
27

- 28 70 • Our research provides a comprehensive comparison of ten European recertification sys-  
29  
30 71 tems and their assessment criteria used to ensure quality of care delivered. It highlights  
31  
32 72 how physicians' knowledge and competence are assessed, which stakeholders are in-  
33  
34 73 volved and how the processes are regulated.  
35  
36 74 • Our research focuses on European countries only as free cross-border movement of pro-  
37  
38 75 fessionals is unique to the European context.  
39  
40 76 • We cannot exclude that interregional variations were missed because recertification sys-  
41  
42 77 tems were decentralized in some countries and we explored the national level only.  
43  
44 78 • The diversity and ambiguity in terminology (recertification, revalidation, continuing pro-  
45  
46 79 fessional development) underline the challenge of comparing various recertification sys-  
47  
48 80 tems.  
49  
50  
51  
52  
53  
54  
55  
56  
57  
58  
59  
60

1  
2  
3 81 **Doctors on the move: international study on national recertification systems**  
4  
5

6 82 **INTRODUCTION**  
7

8 83 Increased mobility of health professionals can pose potential threats to the quality of care.  
9  
10 84 Suppose, for instance, a high performing, Romanian doctor moves to the Netherlands. There,  
11  
12 85 this person will face a new work environment in a distinct healthcare system with specific  
13  
14 86 quality guidelines and different clinical presentations and patient demands. As this new work  
15  
16 87 setting requires specific knowledge, skills, and values that differ from the Romanian context,  
17  
18 88 you may wonder: Will this doctor still be competent to deliver high-quality care?  
19

20  
21  
22 89 While the problem of safeguarding quality of care across borders is omnipresent, it is  
23  
24 90 particularly pertinent in Europe where the free movement of professionals has long historical  
25  
26 91 and legal roots. Although a European Commission directive has facilitated mobility by  
27  
28 92 providing for international recognition of professional qualifications, it fails to guarantee that  
29  
30 93 doctors actually meet the minimum and context-specific quality standards. To safeguard qual-  
31  
32 94 ity of patient care, regulatory bodies around the world have implemented different systems,<sup>1 2</sup>  
33  
34 95 such as recertification systems. Recertification entails lifelong learning and periodic assess-  
35  
36 96 ment of doctors' competence and performance through various methods.<sup>3</sup> More specifically, it  
37  
38 97 requires a formal procedure of assessing and attesting quality of service provided "in accord-  
39  
40 98 ance with established requirements or standards."<sup>4</sup> By renewing initial certification, *recertifi-*  
41  
42 99 *cation* aims to address any decline in performance as well as ensure trained doctors' adapta-  
43  
44 100 tion to advances in knowledge and technology.<sup>5 6</sup> This is particularly important in times of  
45  
46 101 increased publicity over individual failures of medical performance, demands for doctors'  
47  
48 102 accountability, and concerns about patient safety.<sup>7</sup>  
49  
50

51  
52  
53 103 Despite its well-intended aim, recertification harbours two inherent problems. First,  
54  
55 104 current national recertification practices fail to ensure quality of care internationally, as they  
56  
57 105 assess doctors' competence and performance in accordance with *national* quality standards.  
58  
59  
60

1  
2  
3 106 Differences in standards across countries and the absence of international recertification sys-  
4  
5 107 tems may complicate international quality assurance and quality improvement.<sup>6</sup> This begs the  
6  
7 108 question of whether such discrete practices can respond to repeated calls for international ac-  
8  
9 109 countability and transparency.<sup>8</sup> Second, although research on assessment of professional  
10  
11 110 competence provided a set of guidelines for assessment criteria to ensure high quality assess-  
12  
13 111 ment,<sup>9</sup> the question on how to assess doctors' competence has often turned into a political  
14  
15 112 rather than an educational one,<sup>10</sup> potentially impacting on effectiveness of recertification sys-  
16  
17 113 tems.

18  
19  
20  
21 114 "Competence" is defined as the ability to integrate knowledge, skills, and attitudes into  
22  
23 115 a certain context to ensure safe patient care.<sup>11 12</sup> This definition suggests to pay balanced at-  
24  
25 116 tention to multiple competency domains relevant to a doctor, when assessing professional  
26  
27 117 competence.<sup>13</sup> Indeed, many scholars and institutions advocate the assessment of not only  
28  
29 118 medical knowledge and skills, but also competencies, such as communication, collaboration,  
30  
31 119 and clinical judgment.<sup>14 15</sup> Assessment measures must also be robust and focus on the  
32  
33 120 healthcare system's needs and outcomes, implying involvement of key stakeholders, particu-  
34  
35 121 larly patients when evaluating quality of care.<sup>16-19</sup> It is furthermore acknowledged that, for  
36  
37 122 each of the competencies, outcomes of different assessment methods must be combined to  
38  
39 123 ensure robust decision making about professional competence<sup>20 21</sup>

40  
41  
42  
43 124 To conclude, cross-border quality of care will be promoted if countries not only share their  
44  
45 125 recertification practices, but also are willing to critically reflect on quality of assessment pro-  
46  
47 126 cesses embedded in recertification procedures.<sup>7 22</sup> In the present study, we attempt taking a  
48  
49 127 first step in this direction by identifying different national recertification approaches. The  
50  
51 128 question of the present study, therefore, was what are the key characteristics of recertification  
52  
53 129 systems for doctors of different countries? More specifically, we aimed at exploring use of  
54  
55 130 assessment criteria in design of recertification procedures. We used a collective case study



1  
2  
3 131 design to describe and compare different national systems. We were particularly interested in  
4  
5 132 the assessment criteria used, if any, and how they were applied. Although recertification is  
6  
7 133 sometimes also coined “revalidation,” “re-accreditation,” and “maintenance of certification”  
8  
9  
10 134 or used interchangeably with “continuing professional development” in other contexts, this  
11  
12 135 article keeps to the former term. The article builds on previous work on certification but pri-  
13  
14 136 marily focuses on recertification.  
15  
16  
17  
18  
19

## 20 138 **METHODS**

### 21 139 **Study Design and Case Selection**

22  
23  
24 140 We described and analysed the recertification systems of ten individual European countries.  
25  
26 141 Each country’s national recertification system represented a single case. We selected our cas-  
27  
28 142 es using purposeful sampling to reach maximum heterogeneity in terms of geographical  
29  
30 143 spread across Europe, demographics, health professionals’ migration profile, presence of la-  
31  
32 144 bour market restrictions, and type of healthcare system (Table 1).<sup>23</sup>  
33  
34

35 145

36 146 **Table 1.** *Sampling criteria*

| 37 <b>Sampling criterion</b>                                | 38 <b>Specification of criterion</b>                                                                                                                                                                                                                                                                   |
|-------------------------------------------------------------|--------------------------------------------------------------------------------------------------------------------------------------------------------------------------------------------------------------------------------------------------------------------------------------------------------|
| 39<br>40<br>41 <b>Geographical spread</b>                   | 42 Include countries of different sizes, demographic make-up,<br>43 with different cultures, and from a range of geographical lo-<br>44 cations (Northern, Eastern, Southern, Western, and Central<br>45 Europe).                                                                                      |
| 46<br>47 <b>Migration profile</b><br>48 <b>and position</b> | 49 Include countries that have different levels of health profes-<br>50 sional migration (inflow and outflow) and rely more or less<br>51 on foreign doctors; include both “junior” (EU12) and “sen-<br>52 ior” EU member states (EU15) as indicated by the length of<br>53 EU membership.<br>54<br>55 |

---

|                                         |                                                                                                                                                                           |
|-----------------------------------------|---------------------------------------------------------------------------------------------------------------------------------------------------------------------------|
| <b>Labour market re-<br/>strictions</b> | Include countries with (Germany, Ireland, the Netherlands, United Kingdom, and Switzerland) and without initial labour market restrictions (Denmark, Portugal, and Spain) |
| <b>Different healthcare<br/>systems</b> | Include countries with different structures of healthcare services in terms of how they are financed and covered by the insurance system (publicly, privately, or both).  |

---

147

148 EU2 = countries which joined the EU in 2007: Bulgaria and Romania.

149 EU10 = countries which joined the EU in 2004: Cyprus, Czech Republic, Estonia, Hungary,  
150 Latvia, Lithuania, Poland, Slovakia, and Slovenia.151 EU12 = EU2 and EU10 countries: Cyprus, Czech Republic, Bulgaria, Estonia, Hungary, Lat-  
152 via, Lithuania, Poland, Romania, Slovakia, and Slovenia.153 EU15 = countries which were already EU member states in 2003: Austria, Belgium, Den-  
154 mark, Finland, France, Germany, Greece, Ireland, Italy, Luxembourg, the Netherlands, Portu-  
155 gal, Spain, Sweden, and the UK.

156

157

158 Based on these criteria, the final study sample included Denmark, Germany, Hungary,

159 Ireland, Poland, Portugal, Spain, Switzerland, the Netherlands, and the United Kingdom (Ta-

160 ble 2).

161 **Table 2.** *Overview of selected countries and their health insurance systems, their coverage, and the existence of a gatekeeper system*<sup>24-32</sup>

| Country  | Geographic location | Net migration rate (migrants/1,000 inhabitants) <sup>33</sup> | Reliance on foreign doctors (% of all practicing doctors) <sup>23</sup> | Type of health insurance system                                                                   | Financing of healthcare                                                                    |
|----------|---------------------|---------------------------------------------------------------|-------------------------------------------------------------------------|---------------------------------------------------------------------------------------------------|--------------------------------------------------------------------------------------------|
| Denmark  | North               | 2.25                                                          | 6.4% are foreign-trained                                                | Decentralized, offers universal and nearly free access                                            | Taxation                                                                                   |
| Germany  | Central             | 1.06                                                          | 5.7% are foreign born                                                   | Mix of compulsory public and voluntary private health insurance; highly decentralized             | Statutory insurance, taxation, out-of-pocket payments, and private health insurance        |
| Hungary  | East                | 1.34                                                          | 3.6% are foreign born                                                   | National Health Insurance Fund is state-owned and offers complete coverage, partly free of charge | Taxation and social health insurance contributions                                         |
| Ireland  | West                | 3.31                                                          | 20.1% are foreign-trained                                               | National Healthcare System, Mix of public and voluntary private health insurance                  | Taxation and supported by co-payments for specialist's treatment from insurance providers. |
| Poland   | East                | -0.47                                                         | 2.1% are foreign-trained                                                | Decentralized, mandatory health insurance system                                                  | National Health Funds                                                                      |
| Portugal | South               | 2.74                                                          | 11.1% are foreign                                                       | Private and public insurance                                                                      | Taxation, public and private                                                               |

|                 |         |      |                           |                                                                                                                 |                                                                         |
|-----------------|---------|------|---------------------------|-----------------------------------------------------------------------------------------------------------------|-------------------------------------------------------------------------|
|                 |         |      | born                      | schemes plus voluntary private                                                                                  | insurance schemes, and direct                                           |
|                 |         |      |                           | insurances                                                                                                      | payment                                                                 |
| Spain           | South   | 7.24 | 12.5% are foreign-trained | National Health Service<br>Private and public insurance<br>schemes                                              | Taxation and payroll contributions                                      |
| Switzerland     | Central | 5.43 | 22.5% are foreign-trained | Obligatory, statutory, decentralized insurance system<br>Federal Office for Social Insurance monitors providers | Compulsory health insurance premiums and out-of-pocket payments         |
| The Netherlands | Central | 1.97 | 6.2% are foreign-trained  | Mixed model of compulsory social and voluntary private insurance                                                | Health Insurance, taxation and direct payments                          |
| United Kingdom  | West    | 2.56 | 36.8% are foreign-trained | Mix of public and voluntary private health insurance                                                            | National Health Service, taxation, and national insurance contributions |

1  
2  
3 163 **Data collection**  
4

5 164 We collected data on the respective recertification procedures by performing a document  
6  
7 165 analysis for each case in addition to conducting semi-structured interviews with two or three  
8  
9 166 representatives from each country.

10  
11 For the document analyses, we retrieved documents describing national recertification  
12  
13 procedures for doctors from the websites of national certification organizations. We focused  
14  
15 on documents that clarified rationale, form and procedure, as well as requirements and re-  
16  
17 wards of each recertification program. Data collection took place from April to September,  
18  
19 2016.  
20  
21

22  
23 To validate and corroborate our interpretation of data from document analysis, we  
24  
25 conducted semi-structured interviews with representatives of national regulatory bodies re-  
26  
27 sponsible for postgraduate medical education and recertification or the recognition of profes-  
28  
29 sional qualifications (e.g., international affairs offices). These interviewees were deans for  
30  
31 professional practice, heads of recertification departments, experts on continuing professional  
32  
33 development, and official secretaries or legal advisors to national medical education offices,  
34  
35 medical or scientific societies, accreditation bodies, medical royal colleges, councils, or  
36  
37 chambers.  
38  
39

40  
41 The first author (CS) conducted all interviews via video or phone, based on an inter-  
42  
43 view protocol adapted from a study on continuing professional development and lifelong  
44  
45 learning for health professionals.<sup>34</sup> Questions addressed competency frameworks as well as  
46  
47 rules and regulations of recertification, asking about regulatory authorities involved, main  
48  
49 objective(s), structure, requirements, and consequences of compliance or non-compliance.  
50  
51 Before the interview, we explained the research purposes to participants and asked them to  
52  
53 give informed consent.  
54  
55  
56  
57  
58  
59  
60

1  
2  
3 187 **Patient involvement**  
4

5 188 No patients were involved in this research, given our specific aim.  
6  
7

8 189 **Data analysis**  
9

10 190 Data analysis spanned a two-step process. First, we analysed the data from the document  
11  
12 191 analyses and interviews to identify and describe key characteristics of each case. We asked at  
13  
14 192 least one interviewee per country to comment on the accuracy and completeness of the de-  
15  
16 193 scribed recertification system. We subsequently re-analysed the data, specifically focusing on  
17  
18 194 the application of criteria for high quality assessment: validity, reliability, educational and  
19  
20 195 catalytic effect.<sup>9 14 35</sup> For that purpose we identified specific strategies used to ensure assess-  
21  
22 196 ment quality in terms of validity, reliability and educational consequences, for each of the re-  
23  
24 197 certification system (Box 1).  
25  
26  
27

28 198  
29

30 199 **Box 1. Strategies embedded in recertification, affecting assessment quality**  
31

| Criterion               |                                            | Features                                                                                                                                                                                                                                                                                                                                                                                                                                          |
|-------------------------|--------------------------------------------|---------------------------------------------------------------------------------------------------------------------------------------------------------------------------------------------------------------------------------------------------------------------------------------------------------------------------------------------------------------------------------------------------------------------------------------------------|
| What is as-<br>sessed?  | Program of<br>assessment                   | <ul style="list-style-type: none"> <li>• Inclusion of competency domain(s) or domain(s) of professional practice (including lifelong learning)</li> <li>• Use of overarching framework (based on needs healthcare system; key domains professional practice)</li> <li>• Assessment and learning aligned with individual needs</li> <li>• Focus on process of care</li> <li>• Focus on patient outcome (including patient satisfaction)</li> </ul> |
| When is it<br>assessed? | Frequency of<br>recertifica-<br>tion cycle | <ul style="list-style-type: none"> <li>• Yearly</li> <li>• Every 2-3 years</li> <li>• Every 4-5 years</li> <li>• Every &gt; 5 years</li> <li>• No time frame</li> </ul>                                                                                                                                                                                                                                                                           |
| Who assess-<br>es?      | Stakeholders<br>involved in                | <ul style="list-style-type: none"> <li>• Individual (self-assessment)</li> <li>• Peers</li> </ul>                                                                                                                                                                                                                                                                                                                                                 |

---

|                          |                                |                                                                                                                                                                                                                                                                                                                                                                                   |
|--------------------------|--------------------------------|-----------------------------------------------------------------------------------------------------------------------------------------------------------------------------------------------------------------------------------------------------------------------------------------------------------------------------------------------------------------------------------|
|                          | the assess-                    | <ul style="list-style-type: none"> <li>• Employer</li> </ul>                                                                                                                                                                                                                                                                                                                      |
|                          | ment                           | <ul style="list-style-type: none"> <li>• Patients</li> <li>• Others</li> </ul>                                                                                                                                                                                                                                                                                                    |
| How is it assessed?      | Assessment methods             | <ul style="list-style-type: none"> <li>• Competence level according to Miller's assessment pyramid (cognition versus performance)</li> <li>• Self-assessment</li> <li>• Portfolios</li> <li>• Credit collection through course participation</li> <li>• Examinations (standardised)</li> <li>• Simulations</li> <li>• Clinical audits</li> <li>• Multi-source feedback</li> </ul> |
|                          | Regulations                    | <ul style="list-style-type: none"> <li>• Voluntary vs. mandatory</li> <li>• Legal vs. professional obligation</li> </ul>                                                                                                                                                                                                                                                          |
| What are the objectives? | Assessment goal                | <ul style="list-style-type: none"> <li>• Quality of care and patient safety</li> <li>• Professional development</li> <li>• Maintenance of doctors' knowledge and skills</li> </ul>                                                                                                                                                                                                |
|                          | Consequences of non-compliance | <ul style="list-style-type: none"> <li>• Loss of license</li> <li>• Financial sanctions</li> <li>• Follow-up</li> <li>• Work under supervision</li> <li>• Feedback</li> </ul>                                                                                                                                                                                                     |

---

200

201           These strategies included program of assessment, assessment goals and methods (i.e.,

202 authentic and suitable methods), as well as frequency of assessment (i.e., consistent outcomes

203 across measurements and decisions). We also addressed the involvement of different stake-

204 holders including patients, and consequences for learning and development. Self-assessment

205 as tool for lifelong learning and assessment of practice performance were the two major com-

206 ponents of recertification considered.<sup>36</sup> Finally, we compared recertification systems across

207 cases to identify similarities and differences with respect to use of the aforementioned as-

1  
2  
3 208 sessment criteria.  
4  
5  
6

7  
8  
9 209  
10

## 11 210 **RESULTS**

12 211 In the following paragraphs, we highlight differences and/or similarities across countries in  
13 212 terms of the purpose, focus, frequency, and methods of recertification, and the stakeholders  
14 213 involved in the process. Exact details are provided in Table 3, while Table 4 outlines the bod-  
15 214 ies (Medical specialties, Ministries of Health or Medical Authorities) responsible for recertifi-  
16 215 cation. The final paragraph provides a synopsis of the most striking results.  
17  
18  
19  
20  
21

22 216

### 23 217 **1. Purpose of recertification**

24 218 As shown in Table 3, the purpose of recertification constituted a major source of variance.  
25 219 While several countries aimed to improve quality of care and patient safety, a minority (N=2),  
26 220 essentially those countries where recertification was not mandatory, upheld personal devel-  
27 221 opment and career advancement as their primary objective (Table 3).  
28  
29  
30  
31  
32  
33  
34  
35  
36  
37  
38  
39  
40  
41  
42  
43  
44  
45  
46  
47  
48  
49  
50  
51  
52  
53  
54  
55  
56  
57  
58  
59  
60



222 **Table 3.** *Competence assessment in recertification systems of investigated cases*

| Case   | Pur-<br>pose <sup>1</sup> | Focus <sup>2</sup> |     |                         | Based on<br>competen-<br>cy frame-<br>work | Frequency                    |                             | Assess-<br>ment<br>methods <sup>3</sup>           | Who decides on activities to be<br>followed? |                |                           | Stakeholders involved in the<br>assessment |               |                | How is in-<br>ternal quali-<br>ty of assess-<br>ment as-<br>sured?                                           |
|--------|---------------------------|--------------------|-----|-------------------------|--------------------------------------------|------------------------------|-----------------------------|---------------------------------------------------|----------------------------------------------|----------------|---------------------------|--------------------------------------------|---------------|----------------|--------------------------------------------------------------------------------------------------------------|
|        |                           | LLL                | PP  | Mandato-<br>ry (yes/no) |                                            | After<br>...<br>cred-<br>its | Every<br>...<br>year(s<br>) |                                                   | Individu-<br>al doctor                       | Employ-<br>ers | Doctor<br>him/hersel<br>f | Col-<br>leagues                            | Pa-<br>tients | Employ-<br>ers |                                                                                                              |
| Case 1 | 1, 3                      | yes                | yes | yes                     | yes                                        | 200                          | 5                           | 1.4, 1.5,<br>1.6, 1.7, 2,<br>3, 4, 5              | yes                                          | no             | yes                       | yes                                        | yes           | yes            | quality visita-<br>tions, assess-<br>ment of<br>group func-<br>tioning                                       |
| Case 2 | 1, 2                      | yes                | yes | yes                     | N/A                                        | 150                          | 3                           | 1.1, 1.2,<br>1.3, 1.4,<br>1.5, 1.6,<br>1.7, 2, 3  | yes                                          | no             | yes                       | yes                                        | no            | no             | N/A                                                                                                          |
| Case 3 | 1, 3                      | yes                | no  | yes                     | N/A                                        | 250                          | 5                           | 1.1, 1.2,<br>1.3, 1.4,<br>1.6, 1.7, 1.8           | yes                                          | no             | yes                       | no                                         | no            | no             | accreditation<br>of CME<br>providers<br>independent<br>assessors,<br>information<br>triangulation,<br>audits |
| Case 4 | 1, 2, 3                   | yes                | yes | yes                     | yes                                        | 250                          | 5                           | 1.1, 1.2,<br>1.3, 1.4,<br>1.6, 1.7, 2,<br>3, 4, 7 | yes                                          | no             | yes                       | yes                                        | yes           | yes            | information<br>triangulation,<br>audits                                                                      |
| Case 5 | 3                         | yes                | yes | yes                     | yes                                        | 50                           | 1                           | 1.2, 1.3,<br>1.4, 1.5,<br>1.6, 2                  | yes                                          | no             | yes                       | no                                         | no            | no             | N/A                                                                                                          |
| Case 6 | 1, 2                      | no                 | yes | no, volun-<br>tary      | no                                         | N/A                          | 1                           | 1, 3, 4                                           | yes                                          | yes            | yes                       | no                                         | no            | yes            | local man-<br>agement<br>more credits<br>for CPD<br>activities<br>with exams                                 |
| Case 7 | 2                         | yes                | no  | yes                     | N/A                                        | 250                          | 5                           | 1, 1.1, 1.2,<br>1.6, 1.7,<br>1.8, 4, 5, 6         | yes                                          | no             | yes                       | no                                         | no            | no             | accreditation<br>of CME<br>providers                                                                         |
| Case 8 | 3                         | yes                | no  | yes                     | N/A                                        | 200                          | 4                           | 1.1, 1.2,<br>1.4, 1.5,<br>1.6, 1.7                | yes                                          | no             | yes                       | no                                         | no            | no             | accreditation<br>of CME<br>providers                                                                         |

|                |   |     |     |               |     |     |   |        |     |    |     |     |    |       |                                |
|----------------|---|-----|-----|---------------|-----|-----|---|--------|-----|----|-----|-----|----|-------|--------------------------------|
| <b>Case 9</b>  | 4 | yes | yes | no, voluntary | N/A | N/A | 5 | 4      | yes | no | no  | yes | no | (yes) | N/A                            |
| <b>Case 10</b> | 4 | yes | yes | no, voluntary | yes | N/A | 3 | 1.2, 4 | yes | no | yes | yes | no | yes   | organization's quality control |

223 <sup>1</sup>. Recertification purpose: 1. Quality of care; 2. Patient safety; 3. Maintenance of doctors' knowledge and skills; 4. Career.

224 <sup>2</sup>. Focus of recertification: LLL = lifelong learning; PP = Practice performance.

225 <sup>3</sup>. Assessment methods: 1. CPD; 1.1 specialty-specific CPD course; 1.2 General CPD course (communication skills); 1.3 Individual  
 226 learning (reading); 1.4 Conference attendance; 1.5 Teaching; 1.6 Research & scientific publications; 1.7 E-learning; 1.8 Time spent as  
 227 visiting professional; 2. Clinical audit; 3. Appraisal/peer reviews; 4. Portfolio; 5. Minimum hours of patient contact; 6. Mandatory in-  
 228 tensive course; 7. Significant events.

229 Country names are not individually reported due to the perceived sensitivity of the information provided by the interview partner.

230

231 Participation in a recertification program was voluntary in three countries only, though  
 232 all countries imposed a professional or legal obligation to engage in lifelong learning. Con-  
 233 sequences of non-compliance were non-existent in voluntary systems; in the mandatory sys-  
 234 tems (N=7), however, they varied from financial sanctions (N=2) or work under supervision  
 235 to suspension of the license to practice (N=3), with two countries allowing for license recov-  
 236 ery. Finally, one country conferred a lifelong registration upon doctors, obviating the need to  
 237 impose any sanctions in practice (Table 4).

238

239 **Table 4.** Regulation of recertification process in the countries under scrutiny

| Case number | Who sets rules for recertification? |                    |                                |                                 | Potential <sup>240</sup>                    |
|-------------|-------------------------------------|--------------------|--------------------------------|---------------------------------|---------------------------------------------|
|             | Medical Specialties                 | Ministry of Health | Medical Authority <sup>1</sup> | Type of obligation <sup>2</sup> | consequences of non-compliance <sup>3</sup> |
| Case 1      | yes                                 | yes                | yes                            | 1                               | (1), 2                                      |
| Case 2      | yes                                 | no                 | no                             | 1,2                             | 3, 4                                        |
| Case 3      | no                                  | yes                | yes                            | 1,2                             | 1, 3                                        |
| Case 4      | no                                  | no                 | yes                            | 1,2                             | 1, 2                                        |
| Case 5      | yes                                 | no                 | yes                            | 1                               | 4, 5                                        |
| Case 6      | /                                   | /                  | yes                            | 2                               | 4                                           |
| Case 7      | /                                   | yes                | yes                            | 1                               | 1                                           |
| Case 8      | /                                   | yes                | yes                            | 1                               | 4                                           |
| Case 9      | /                                   | /                  | /                              | /                               | 4                                           |
| Case 10     | yes                                 | /                  | yes                            | 1                               | 4                                           |

241 <sup>1</sup> Medical Authority such as the General Medical Council242 <sup>2</sup> Type of obligation: 1. Legal; 2. Professional243 <sup>3</sup> Potential consequences of non-compliance are: 1. Work supervised or suspen-  
 244 sion of license; 2. Suspension of license with possibility to restore license; 3. Fi-  
 245 nancial sanctions; 4. No formal consequences / license for lifetime; 5. Follow-up.

## 246 **2. Focus of the assessment**

247 As regards focus, almost all recertification systems emphasized the lifelong learning of doc-  
248 tors. Likewise, most systems relied on the collection of a minimum number of credits per  
249 year, mostly 50 (N=5), where one credit typically represented one hour of learning activity.  
250 Although the three voluntary systems did not require credits to be earned for recertification,  
251 one did recommend it (case 6). Such practice was often embedded in a continuing profession-  
252 al development framework as part of a voluntary recertification process. In another country,  
253 doctors must take a specific course followed by an exam. Generally, they received more cred-  
254 its for courses if these were concluded with an examination (case 7). Of the countries that  
255 assessed practice performance, only five did so through audits and appraisals or multi-source  
256 feedback. Four countries evaluated doctors' individual and team functioning focusing on  
257 communication and collaboration skills.

## 259 **3. Frequency of recertification**

260 The frequency of recertification and timeframe within which requirements must be fulfilled  
261 varied widely: some countries had annual appraisals (N=2), others three-year procedures  
262 (N=2), but most of the countries undertook quinquennial assessments (N=5).

## 264 **4. Assessment methods**

265 To demonstrate their knowledge and engagement in lifelong learning, doctors in most coun-  
266 tries must earn credits, for instance by participating in workshops and national or international  
267 conferences, doing individual reading, teaching, writing scientific articles, spending time as  
268 visiting doctor, and/or e-learning. One country assessed performance on the basis of a dialog  
269 between employer and employee who jointly discussed learning needs. Another country  
270 counted reflection on significant events, that is, unintended critical events which potentially

1  
2  
3 271 harmed the patient, to measure patient outcomes. Yet other countries (N=4) used clinical au-  
4  
5 272 dits, number of complaints, reviews or appraisals, and peer reviews to measure processes of  
6  
7 273 healthcare delivery. Finally, some countries deployed portfolios (N=6), clinical audits (N=4),  
8  
9 274 and multi-source feedback (N=4) to reflect on individual and team functioning.  
10  
11  
12 275

## 14 276 **5. Stakeholder involvement**

16 277 In most cases (N=9), doctors decided which learning activities to take based on their self-  
17  
18 278 assessed learning needs. Several countries, however, also based the assessment of perfor-  
19  
20 279 mance outcomes and the process of care on feedback from peers (N=5) or patients (N=2), yet  
21  
22 280 only one country demanded involving patients in the assessment regularly.  
23  
24  
25 281

## 27 282 **6. Synopsis**

29 283 All things considered, what stood out was that most recertification systems relied heavily on  
30  
31 284 doctors' self-assessments, attached little weight to patient outcomes, patient involvement, and  
32  
33 285 the assessment of practice performance, as well as lacked an overarching competency frame-  
34  
35 286 work. Only four countries seem to match the content of assessment programs with evaluation  
36  
37 287 of professional practice. These findings clearly contrast with the aim to ensure quality of care  
38  
39 288 and patient safety most systems pursued. Evaluation of practice performance seems to be a  
40  
41 289 *sine qua non*, an indispensable condition, for assessment of competence, i.e. what doctors  
42  
43 290 actually do in day-to-day practice. Two countries (case 1 and 4), however, did use a more  
44  
45 291 comprehensive system, covering both self-assessment and practice performance through mul-  
46  
47 292 ti-source feedback, including patients' feedback.  
48  
49  
50  
51

52 293 Three other countries deserve mention for their apparent distinctness from the rest.  
53  
54 294 One country, though not formally requiring continuing professional development, assessed  
55  
56 295 practice performance based on an annual dialog between doctor and employer. This left little  
57  
58  
59  
60

1  
2  
3 296 room for individual doctors to self-assess their performance and independently decide on ac-  
4  
5 297 tivities to be taken, which was the case in all other countries where the individual doctor was  
6  
7 298 responsible for high-quality patient care. The remaining two recertification systems stood out  
8  
9 299 as being career-focused: they did not require doctors to engage in lifelong learning and pro-  
10  
11 300 fessional development for purposes of patient safety and quality patient care, but rather en-  
12  
13 301 couraged the use of a portfolio to enhance chances of promotion.  
14  
15  
16

## 17 302 **DISCUSSION**

18  
19 303 The purpose of this study was to investigate how recertification is organized across different  
20  
21 304 countries. We found substantial differences in recertification requirements and procedures.  
22  
23 305 Moreover, these requirements in many respects seemed to conflict with aims to ensure quality  
24  
25 306 of care and patient safety.  
26  
27

28  
29 307 First, we observed that only a few systems included feedback from patients in the as-  
30  
31 308 sessment. Involving patients to prefigure patient outcomes and quality seems inevitable for  
32  
33 309 accountability and transparency purposes.<sup>37</sup> Although many patients are needed to obtain reli-  
34  
35 310 able evaluations, their involvement in recertification procedures can help respond to public  
36  
37 311 calls for doctors' accountability.<sup>9</sup> Wright et al recommend including data from 34 patient  
38  
39 312 questionnaires and 15 colleague questionnaires to obtain reliable performance evaluation for  
40  
41 313 appraisal purposes.<sup>38</sup> Despite the fact that the literature reports peers to give accurate, credi-  
42  
43 314 ble, and valid assessments of performance, peer feedback was absent in most systems.<sup>9 14 39</sup>  
44  
45 315 Use of multi-source feedback to assess practice performance, requires high quality and credi-  
46  
47 316 ble feedback to induce reflection on practice.<sup>40</sup> Multi-source feedback, including patients'  
48  
49 317 feedback, can be especially effective when the feedback received contrasts with individual  
50  
51 318 perceptions and is facilitated by a mentor or coach.<sup>41</sup> A mentor can help to deal with the emo-  
52  
53 319 tional aspects of the multi-source feedback and to structure individual reflection and follow-  
54  
55 320 up.<sup>42</sup> Use of multisource feedback and mentoring systems could thus help countries transition-  
56  
57  
58  
59  
60

1  
2  
3 321 ing from a system based on self-assessments to “directed” self-assessments as suggested by  
4  
5 322 Sargeant et al.<sup>43</sup>  
6

7 323 Second, most systems relied on self-assessments and lifelong learning activities doc-  
8  
9 324 tors selected themselves without attending to external assessment of practice performance.  
10  
11 325 More specifically, by relying on credit accumulation systems that allowed doctors to choose  
12  
13 326 their learning activities,<sup>44</sup> it was entirely at the doctors’ discretion to judge their performance  
14  
15 327 and learning needs. There’s strong evidence however, that several individual and social fac-  
16  
17 328 tors obscure the validity of self-assessments such as age and experience.<sup>44 45</sup> Additionally,  
18  
19 329 self-assessments tend to mirror self-confidence and self-efficacy which are not necessarily  
20  
21 330 good measures of doctors’ competence.<sup>44</sup> This evidence provides ample ground to question  
22  
23 331 both the effectiveness of recertification systems that rely on doctors’ self-assessments and the  
24  
25 332 autonomy granted to clinicians.<sup>16 46</sup> Hence, assessments of competence will become more  
26  
27 333 meaningful when they involve multiple assessors, including patients.  
28  
29  
30  
31

32 334 Another deviation from the purpose of recertification constituted the assessment meth-  
33  
34 335 ods used. Whereas activities such as reading written materials, and attending conferences or  
35  
36 336 presentations have been shown to deepen specific knowledge, there is no evidence that such  
37  
38 337 didactic and passive learning interventions alone improve performance and patient  
39  
40 338 outcomes.<sup>47-49</sup> A causal link between educational activities and improved patient health status  
41  
42 339 yet remains to be established.<sup>50</sup> This casts doubt on the impact of the recertification systems in  
43  
44 340 our study on doctors’ performance. Consequently, our findings reinforce concerns about the  
45  
46 341 validity of recertification procedures and emphasize the need to combine various assessment  
47  
48 342 methods, likely resulting in greater accountability as previously been proven.<sup>51</sup> As stated by  
49  
50 343 Forsetlund and colleagues (2009), a combination of multiple media, multiple instructional  
51  
52 344 techniques and multiple exposures can help to induce change in performance towards im-  
53  
54 345 proved patient outcomes.<sup>52</sup>  
55  
56  
57  
58  
59  
60

1  
2  
3 346 Since medical specialists invest substantial time and money in their professional de-  
4  
5 347 velopment, the feasibility, applicability, and acceptability of recertification are topics worth  
6  
7 348 exploring in the context of quality assurance. We therefore invite future studies into stake-  
8  
9 349 holders' perceptions of recertification and their effectiveness and impact,<sup>53</sup> and also to bring  
10  
11 350 into focus the content and formal aspects of learning activities which, by facilitating its design  
12  
13 351 and implementation, may improve recertification. To shed light on the full picture, we would  
14  
15 352 furthermore welcome studies investigating the feasibility and acceptability of involving pa-  
16  
17 353 tients in evaluating physicians' competency.

### 21 354 **Limitations**

22  
23  
24 355 Since recertification systems were decentralized in some countries and we explored the na-  
25  
26 356 tional level only, we cannot exclude that interregional variations were missed. Moreover, alt-  
27  
28 357 hough the interviewees ideally represented at least two different national organizations, inter-  
29  
30 358 views were mostly limited to two or three respondents per country. A final and possibly the  
31  
32 359 most complex and intervening limitation constituted the diversity in terminology and lan-  
33  
34 360 guage. This may have affected the translation of national concepts into English during the  
35  
36 361 interviews and of written descriptions, potentially causing loss of detail during the analyses.  
37  
38 362 These language differences and ambiguity in terms underline the challenge of comparing var-  
39  
40 363 ious recertification systems.

### 44 364 **Practical implications for professional mobility**

45  
46 365 Defining universal criteria for assessing professional competence will be no easy feat, espe-  
47  
48 366 cially not when considering the differences between national recertification approaches, rising  
49  
50 367 cross-border mobility. Since each system is customized to a specific context, culture, and  
51  
52 368 healthcare system, a universal recertification system may neither be desirable nor achievable,  
53  
54 369 as doctors are required to adapt to the unique features of their work setting and health care  
55  
56 370 system. For transparency purposes, however, medical societies could share their competency



1  
2  
3 371 assessment procedures and quality standards, turning a political matter into an educational  
4  
5 372 (and quality assurance) matter.<sup>7</sup> Moreover, national bodies can incorporate performance eval-  
6  
7 373 uation, involve multiple stakeholders including patients, and use other assessments besides  
8  
9 374 clinicians' self-assessments in their re-certification procedures to enhance liability.<sup>54</sup>

10  
11  
12 375 Achieving an overarching quality assurance system being an unrealistic goal, we need  
13  
14 376 to have a shared understanding of what are minimum standards for a doctor<sup>46</sup> thereby creating  
15  
16 377 a base for international comparison while allowing for local adaptations. Such standards of  
17  
18 378 training content and certification directives could meet the challenges posed by the free,  
19  
20 379 cross-border movement of professionals, improving patient safety, and enhancing accounta-  
21  
22 380 bility and transparency.

## 23 24 25 26 381 **Conclusion**

27  
28 382 Recertification can help assess and improve knowledge, skills, professional performance, and,  
29  
30 383 ultimately, patient outcomes. Yet, systems vary widely across countries in terms of being  
31  
32 384 compulsory or not, requirements, patient involvement, and consequences of compliance or  
33  
34 385 non-compliance. A shift toward a broader program of assessment focused on competence as-  
35  
36 386 sessment and lifelong learning might create a more valid, credible, and reliable basis for  
37  
38 387 recertification, meeting growing demands for accountability and transparency.

39  
40  
41  
42  
43  
44  
45  
46  
47  
48  
49  
50  
51  
52  
53  
54  
55  
56  
57  
58  
59  
60

1  
2  
3 388 Acknowledgements: We would like to thank Professor Dame Lesley Southgate, FRCGP,  
4  
5 389 FRCP, MClin, Sci, for contributing to this manuscript with discussing the study design and  
6  
7 390 suggesting possible interview partners. Angelique van den Heuvel provided help in form of  
8  
9 391 language editing, which we highly appreciated. Furthermore, we would like to thank all inter-  
10  
11 392 viewees for their contribution.  
12  
13

14 393  
15  
16 394 Contributors: CS wrote the research plan, collected, cleaned and analysed the data, and draft-  
17  
18 395 ed and revised the paper. She is guarantor. All authors were involved with conceptualizing the  
19  
20 396 research. MG analysed the data, and drafted and revised the paper. SM revised the paper. GR  
21  
22 397 drafted and revised the paper. FS drafted and revised the paper. ED analysed the data, drafted  
23  
24 398 and revised the draft paper.  
25  
26

27 399  
28  
29 400 Funding statement: Carolin Sehlbach is a PhD student at Maastricht University, on a project  
30  
31 401 funded by the European Respiratory Society. The research conducted by Carolin Sehlbach is  
32  
33 402 however independent from this funding.  
34  
35

36 403  
37  
38 404 Competing interests: None declared. All authors have completed the *Unified Competing In-*  
39  
40 405 *terest* form (available on request from the corresponding author).  
41  
42

43 406  
44  
45 407 Ethical Approval: Ethical approval was obtained from the Netherlands Association for Medi-  
46  
47 408 cal Education (NVMO; file number 669).  
48  
49

50 409  
51  
52 410 Data sharing: The dataset(s) supporting the conclusions of this article is available from the  
53  
54 411 author upon request by emailing the corresponding author.  
55  
56

57 412  
58  
59  
60

1  
2  
3 413 Transparency declaration: Carolin Sehlbach affirms that the manuscript is an honest, accurate,  
4  
5 414 and transparent account of the study being reported; that no important aspects of the study  
6  
7 415 have been omitted; and that any discrepancies from the study as planned (and, if relevant,  
8  
9  
10 416 registered) have been explained.  
11  
12  
13  
14  
15  
16  
17  
18  
19  
20  
21  
22  
23  
24  
25  
26  
27  
28  
29  
30  
31  
32  
33  
34  
35  
36  
37  
38  
39  
40  
41  
42  
43  
44  
45  
46  
47  
48  
49  
50  
51  
52  
53  
54  
55  
56  
57  
58  
59  
60

## 417 REFERENCES

- 418 1. Peck C, McCall M, McLaren B, et al. Continuing medical education and continuing professional  
419 development: international comparisons. *BMJ* 2000;320(7232):432-35. doi:  
420 10.1136/bmj.320.7232.432
- 421 2. Horsley T, Grimshaw J, Campbell C. Maintaining the competence of Europe's workforce. *BMJ* 2010;341  
422 doi: 10.1136/bmj.c4687
- 423 3. Ahmed K, Khan RS, Darzi A, et al. Recertification: What do specialists think about skill assessment?  
424 *Surgeon* 2013;11(3):120-24. doi: <http://dx.doi.org/10.1016/j.surge.2012.12.004>
- 425 4. Bach S. International migration of health workers: Labour and social issues. In: Office IL, ed. Geneva,  
426 2003.
- 427 5. Choudhry NK, Fletcher RH, Soumerai SB. Systematic Review: The Relationship between Clinical  
428 Experience and Quality of Health Care. *Ann Intern Med* 2005;142(4):260-73. doi: 10.7326/0003-  
429 4819-142-4-200502150-00008
- 430 6. Ahmed K, Wang TT, Ashrafian H, et al. The effectiveness of continuing medical education for specialist  
431 recertification. *Can Urol Assoc J* 2013;7(7-8):266-72. doi: 10.5489/cuaj.378 [published Online First:  
432 2013/09/14]
- 433 7. Boulet J, van Zanten M. Ensuring high-quality patient care: the role of accreditation, licensure, specialty  
434 certification and revalidation in medicine. *Med Educ* 2014;48(1):75-86. doi: 10.1111/medu.12286  
435 [published Online First: 2013/12/18]
- 436 8. Shaw K, Cassel CK, Black C, et al. Shared medical regulation in a time of increasing calls for  
437 accountability and transparency: Comparison of recertification in the united states, canada, and the  
438 united kingdom. *JAMA* 2009;302(18):2008-14. doi: 10.1001/jama.2009.1620
- 439 9. Norcini J, Anderson B, Bollela V, et al. Criteria for good assessment: Consensus statement and  
440 recommendations from the Ottawa 2010 Conference. *Med Teach* 2011;33(3):206-14. doi:  
441 10.3109/0142159X.2011.551559
- 442 10. Brightwell A, Grant J. Competency-based training: who benefits? *Postgrad Med J* 2013;89(1048):107-10.  
443 doi: 10.1136/postgradmedj-2012-130881
- 444 11. Frank JR, Snell LS, Cate OT, et al. Competency-based medical education: theory to practice. *Med Teach*  
445 2010;32(8):638-45. doi: 10.3109/0142159X.2010.501190
- 446 12. Iobst WF, Sherbino J, Cate OT, et al. Competency-based medical education in postgraduate medical  
447 education. *Med Teach* 2010;32(8):651-56. doi: 10.3109/0142159x.2010.500709
- 448 13. Mulder H, Cate OT, Daalder R, et al. Building a competency-based workplace curriculum around  
449 entrustable professional activities: the case of physician assistant training. *Med Teach*  
450 2010;32(10):e453-e59. doi: 10.3109/0142159x.2010.513719
- 451 14. Epstein RM, Hundert EM. Defining and assessing professional competence. *JAMA* 2002;287(2):226-35.  
452 doi: 10.1001/jama.287.2.226
- 453 15. Frank JR. The CanMEDS 2005 physician competency framework: Better standards, better physicians,  
454 better care: Royal College of Physicians and Surgeons of Canada 2005.
- 455 16. Epstein RM. Assessment in Medical Education. *N Engl J Med* 2007;356(4):387-96. doi:  
456 doi:10.1056/NEJMra054784
- 457 17. Horowitz SD. Invited Article: Maintenance of certification: the next phase in assessing and improving  
458 physician performance. *Neurology* 2008;71(8):605-9. doi: 10.1212/01.wnl.0000323936.44568.a6
- 459 18. Lipner RS, Hess BJ, Phillips RL. Specialty Board Certification in the United States: Issues and Evidence.  
460 *J Contin Educ Health Prof* 2013;33(S1):S20-S35. doi: 10.1002/chp.21203
- 461 19. Miller GE. The assessment of clinical skills/competence/performance. *Acad Med* 1990;65(9):S63-7. doi:  
462 10.1097/00001888-199009000-00045
- 463 20. Jamtvedt G, Young JM, Kristoffersen DT, O'Brien MA, Oxman AD. Audit and feedback: effects on  
464 professional practice and health care outcomes (Review). *Cochrane Libr* 2007(4) doi:  
465 10.1002/14651858.CD000259.pub3
- 466 21. Ivers N, Jamtvedt G, Flottorp S, et al. Audit and feedback: effects on professional practice and healthcare  
467 outcomes. *Cochrane Database Syst Rev* 2012(6):Cd000259. doi: 10.1002/14651858.CD000259.pub3  
468 [published Online First: 2012/06/15]

- 1  
2  
3  
4  
5 469 22. Godlee F. European countries need to work together. *BMJ* 2010;341 doi: 10.1136/bmj.c5395  
6 470 23. Buchan J, Wismar M, Glinos IA, et al. Health professional mobility in a changing Europe: new dynamics,  
7 471 mobile individuals and diverse responses: World Health Organization 2014.  
8 472 24. Barros P, Machado S, Simões J. Portugal: Health system review. *Health Syst Transit*, 2011.  
9 473 25. Jakubowski E, Busse R. Health Care Systems in the EU - a comparative study. In: Chambers GR, ed.  
10 474 Luxembourg: European Parliament, 1998.  
11 475 26. Jacobs R, Goddard M. Social health insurance systems in European countries: the role of the insurer in the  
12 476 health care system: a comparative study of four European countries, 2000.  
13 477 27. Mossialos E, Wenzl M, Osborn R, et al. International profiles of health care systems, 2014. New York,  
14 478 NY: The Commonwealth Fund, 2015.  
15 479 28. Boyle S. United Kingdom (England): Health system review. *Health Syst Transit*, 2011.  
16 480 29. McDaid D WM, Maresso A and Mossialos E. Ireland: Health system review. *Health Syst Transit*, 2009.  
17 481 30. Sagan A, Panteli D, Borkowski W, et al. Poland health system review. *Health Syst Transit*, 2011:1-193.  
18 482 31. Garcia-Armesto S, Abadia-Taira M, Durán A, et al. Spain: health system review. *Health Syst Transit*  
19 483 2010;12(4):1-295.  
20 484 32. Gaal P, Szigeti S, Csere M, et al. Hungary health system review. *Health Syst Transit* 2011;13(5):1-266.  
21 485 33. Net migration rate: IndexMundi; 2014 [Available from: <http://www.indexmundi.com/g/r.aspx?v=27>  
22 486 accessed 14th July 2016].  
23 487 34. European Commission. Study concerning the review and mapping of continuous professional  
24 488 development and lifelong learning for health professionals in the EU In: 2008-2013 EHP, ed.:  
25 489 European Commission, 2015.  
26 490 35. Grimshaw JM, Shirran L, Thomas R, et al. Changing provider behavior: an overview of systematic  
27 491 reviews of interventions. *Medical care* 2001;39(8 Suppl 2):Ii2-45. [published Online First:  
28 492 2001/10/05]  
29 493 36. Iglehart JK, Baron RB. Ensuring Physicians' Competence — Is Maintenance of Certification the Answer?  
30 494 *N Engl J Med* 2012;367(26):2543-49. doi: 10.1056/NEJMhpr1211043  
31 495 37. Van Der Wees PJ, Nijhuis-Van Der Sanden MWG, Ayanian JZ, et al. Integrating the Use of Patient-  
32 496 Reported Outcomes for Both Clinical Practice and Performance Measurement: Views of Experts  
33 497 from 3 Countries. *Milbank Q* 2014;92(4):754-75. doi: 10.1111/1468-0009.12091  
34 498 38. Wright C, Richards SH, Hill JJ, et al. Multisource Feedback in Evaluating the Performance of Doctors:  
35 499 The Example of the UK General Medical Council Patient and Colleague Questionnaires. *Acad Med*  
36 500 2012;87(12):1668-78. doi: 10.1097/ACM.0b013e3182724cc0  
37 501 39. Cervero RM, Gaines JK. The impact of CME on physician performance and patient health outcomes: an  
38 502 updated synthesis of systematic reviews. *J Contin Educ Health Prof* 2015;35(2):131-8. doi:  
39 503 10.1002/chp.21290 [published Online First: 2015/06/27]  
40 504 40. Ferguson J, Wakeling J, Bowie P. Factors influencing the effectiveness of multisource feedback in  
41 505 improving the professional practice of medical doctors: a systematic review. *BMC Med Educ*  
42 506 2014;14(1):76. doi: 10.1186/1472-6920-14-76  
43 507 41. Sargeant JM, Mann KV, van der Vleuten CP, et al. Reflection: a link between receiving and using  
44 508 assessment feedback. *Adv Health Sci Educ Theory Pract* 2009;14(3):399-410. doi: 10.1007/s10459-  
45 509 008-9124-4 [published Online First: 2008/06/06]  
46 510 42. Driessen EW OK. Mentoring. In: K W, ed. Oxford textbook of medical education. London: Oxford  
47 511 University Press 2013:265-84.  
48 512 43. Sargeant J, Mann K, van der Vleuten C, et al. "Directed" self-assessment: Practice and feedback within a  
49 513 social context. *J Contin Educ Health Prof* 2008;28(1):47-54. doi: 10.1002/chp.155  
50 514 44. Davis DA, Mazmanian PE, Fordis M, et al. Accuracy of physician self-assessment compared with  
51 515 observed measures of competence: A systematic review. *JAMA* 2006;296(9):1094-102. doi:  
52 516 10.1001/jama.296.9.1094  
53 517 45. Violato C, Lockyer J. Self and Peer Assessment of Pediatricians, Psychiatrists and Medicine Specialists:  
54 518 Implications for Self-Directed Learning. *Adv Health Sci Educ Theory Pract* 2006;11(3):235-44. doi:  
55 519 10.1007/s10459-005-5639-0  
56 520 46. Schuwirth LW, Southgate L, Page GG, et al. When enough is enough: a conceptual basis for fair and  
57 521 defensible practice performance assessment. *Med Educ* 2002;36(10):925-30. [published Online First:  
58 522 2002/10/23]

- 1  
2  
3  
4  
523 47. Davis D, O'Brien MA, Freemantle N, et al. Impact of formal continuing medical education: do  
524 conferences, workshops, rounds, and other traditional continuing education activities change  
525 physician behavior or health care outcomes? *JAMA* 1999;282(9):867-74. doi:  
526 10.1001/jama.282.9.867 [published Online First: 1999/09/09]  
527 48. Khan KS, Coomarasamy A. A hierarchy of effective teaching and learning to acquire competence in  
528 evidenced-based medicine. *BMC Med Educ* 2006;6:59-59. doi: 10.1186/1472-6920-6-59  
529 49. Grant J. The good CPD guide. A practical guide to managed continuing professional development in  
530 medicine. 2nd ed. London: New York Radcliffe Publishing 2011.  
531 50. Moore DE, Jr., Green JS, Gallis HA. Achieving desired results and improved outcomes: integrating  
532 planning and assessment throughout learning activities. *J Contin Educ Health Prof* 2009;29(1):1-15.  
533 doi: 10.1002/chp.20001 [published Online First: 2009/03/17]  
534 51. Davis D, Galbraith R. Continuing medical education effect on practice performance: effectiveness of  
535 continuing medical education: American College of Chest Physicians Evidence-Based Educational  
536 Guidelines. *Chest* 2009;135(3 Suppl):42s-48s. doi: 10.1378/chest.08-2517 [published Online First:  
537 2009/03/20]  
538 52. Forsetlund L, Bjorndal A, Rashidian A, et al. Continuing education meetings and workshops: effects on  
539 professional practice and health care outcomes. *Cochrane Database Syst Rev* 2009(2):Cd003030.  
540 doi: 10.1002/14651858.CD003030.pub2 [published Online First: 2009/04/17]  
541 53. Cook DA, Blachman MJ, West CP, et al. Physician Attitudes About Maintenance of Certification. *Mayo*  
542 *Clin Proc* 2016;91(10):1336-45. doi: 10.1016/j.mayocp.2016.07.004  
543 54. Irvine D. Patients, professionalism, and revalidation. *BMJ* 2005;330(7502):1265-68. doi:  
544 10.1136/bmj.330.7502.1265  
545

# BMJ Open

## Doctors on the move: a European case study on the key characteristics of national recertification systems

|                                 |                                                                                                                                                                                                                                                                                                                                                                                                                                                                                                                                                                                                                                     |
|---------------------------------|-------------------------------------------------------------------------------------------------------------------------------------------------------------------------------------------------------------------------------------------------------------------------------------------------------------------------------------------------------------------------------------------------------------------------------------------------------------------------------------------------------------------------------------------------------------------------------------------------------------------------------------|
| Journal:                        | <i>BMJ Open</i>                                                                                                                                                                                                                                                                                                                                                                                                                                                                                                                                                                                                                     |
| Manuscript ID                   | bmjopen-2017-019963.R1                                                                                                                                                                                                                                                                                                                                                                                                                                                                                                                                                                                                              |
| Article Type:                   | Research                                                                                                                                                                                                                                                                                                                                                                                                                                                                                                                                                                                                                            |
| Date Submitted by the Author:   | 08-Jan-2018                                                                                                                                                                                                                                                                                                                                                                                                                                                                                                                                                                                                                         |
| Complete List of Authors:       | Sehlbach, Carolin; Maastricht University - Location Randwyck, Department of Educational Research and Development<br>Govaerts, MJ; Maastricht University, Department of Educational Research and Development<br>Mitchell, Sharon; European Respiratory Society, Education<br>Rohde, Gernot; Johann Wolfgang Goethe University Hospital, Respiratory Medicine<br>Smeenck, Frank; Department of Respiratory Medicine, Catharina Hospital; Maastricht University - Location Randwyck, Department of Educational Research and Development<br>Driessen, Erik ; Maastricht University , Department of Educational Research and Development |
| <b>Primary Subject Heading</b>: | Medical education and training                                                                                                                                                                                                                                                                                                                                                                                                                                                                                                                                                                                                      |
| Secondary Subject Heading:      | Medical education and training                                                                                                                                                                                                                                                                                                                                                                                                                                                                                                                                                                                                      |
| Keywords:                       | Recertification, Continuing Professional Development, Performance assessment, Patient safety, Quality assurance, Professional mobility                                                                                                                                                                                                                                                                                                                                                                                                                                                                                              |
|                                 |                                                                                                                                                                                                                                                                                                                                                                                                                                                                                                                                                                                                                                     |

SCHOLARONE™  
Manuscripts

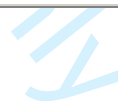



1 **Doctors on the move: a European case study on the key characteristics of national recer-**  
2 **tification systems**

3 C Sehlbach, MJB Govaerts, S Mitchell, GGU Rohde, FWJM Smeenk, EW Driessen

- 4 - Carolin Sehlbach, PhD student, Maastricht University, Faculty of Health, Medicine  
5 and Life Sciences, Educational Development and Research, 6229 ER Maastricht, The  
6 Netherlands
- 7 - Marjan J B Govaerts, Associate professor, Maastricht University, Faculty of Health,  
8 Medicine and Life Sciences, Educational Development and Research, 6229 ER Maas-  
9 tricht, The Netherlands
- 10 - Sharon Mitchell, Educational Standards Manager, European Respiratory Society, De-  
11 partment of Education, 1003 Lausanne, Switzerland
- 12 - Gernot G U Rohde, Professor, Johann Wolfgang Goethe University Hospital, Respira-  
13 tory Medicine, 60590 Frankfurt am Main, Germany
- 14 - Frank W J M Smeenk, Professor, Catharina Hospital, Respiratory Medicine, 5623 EJ  
15 Eindhoven, The Netherlands
- 16 - Erik W Driessen; Professor, Maastricht University, Faculty of Health, Medicine and  
17 Life Sciences, Educational Development and Research, 6229 ER Maastricht, The  
18 Netherlands

19  
20 **Corresponding author:** Carolin Sehlbach, MSc, PhD Student, Maastricht University, Facul-  
21 ty of Health, Medicine and Life Sciences, Educational Development and Research, Universi-  
22 teitssingel 60, 6229 ER Maastricht, The Netherlands  
23 ([carolin.sehlbach@maastrichtuniversity.nl](mailto:carolin.sehlbach@maastrichtuniversity.nl))  
24 T +31 433881628

25  
26 Word count: 3,265 words

27 Details on funding: Carolin Sehlbach is a PhD student at Maastricht University, on a project



1  
2  
3  
4  
5 28 funded by the European Respiratory Society.  
6

7 29 Copyright: The Corresponding Author has the right to grant on behalf of all authors and does  
8

9 30 grant on behalf of all authors, an exclusive licence on a worldwide basis to the BMJ Publish-  
10

11 31 ing Group Ltd to permit this article (if accepted) to be published in BMJ editions and any oth-  
12

13 32 er BMJ PGL products and sublicenses such use and exploit all subsidiary rights, as set out in  
14

15  
16 33 our licence.  
17  
18  
19  
20  
21  
22  
23  
24  
25  
26  
27  
28  
29  
30  
31  
32  
33  
34  
35  
36  
37  
38  
39  
40  
41  
42  
43  
44  
45  
46  
47  
48  
49  
50  
51  
52  
53  
54  
55  
56  
57  
58  
59  
60

1  
2  
3  
4  
5 34 **Doctors on the move: a European case study on the key characteristics of national recer-**  
6  
7 35 **tification systems**  
8  
9

10 36 **ABSTRACT**  
11

12 37 **Objectives:** With increased cross-border movement, ensuring safe and high-quality healthcare  
13  
14 38 has gained primacy. The purpose of recertification is to ensure quality of care through period-  
15  
16 39 ically attesting doctors' professional proficiency in their field. Professional migration and  
17  
18 40 facilitated cross-border recognition of qualifications, however, make us question the fitness of  
19  
20 41 national policies for safeguarding patient care and the international accountability of doctors.  
21  
22

23 42 **Design and setting:** We performed document analyses and conducted 19 semi-structured  
24  
25 43 interviews to identify and describe key characteristics and effective components of 10 differ-  
26  
27 44 ent European recertification systems, each representing one case (collective case study). We  
28  
29 45 subsequently compared these systems to explore similarities and differences in terms of as-  
30  
31 46 sessment criteria used to determine process quality.  
32  
33

34 47 **Results:** Great variety existed between countries in terms and assessment formats used, tar-  
35  
36 48 geting cognition, competence and performance (Miller's assessment pyramid). Recertification  
37  
38 49 procedures and requirements also varied significantly, ranging from voluntary participation in  
39  
40 50 professional development modules to the mandatory collection of multiple performance data  
41  
42 51 in a competency-based portfolio. Knowledge assessment was fundamental to recertification in  
43  
44 52 most countries. Another difference concerned the stakeholders involved in the recertification  
45  
46 53 process: while some systems exclusively relied on doctors' self-assessment, others involved  
47  
48 54 multiple stakeholders but rarely included patients in assessment of doctors' professional com-  
49  
50 55 petence. Differences between systems partly reflected different goals and primary purposes of  
51  
52 56 recertification.  
53  
54

55 57 **Conclusion:** Recertification systems differ substantially internationally with regard to the  
56  
57  
58  
59  
60

1  
2  
3  
4  
5 58 criteria they apply to assess doctors' competence, their aims, requirements, assessment for-  
6  
7 59 mats, and patient involvement. In the light of professional mobility and associated demands  
8  
9 60 for accountability, we recommend that competence assessment include patients' perspectives,  
10  
11 61 and recertification practices be shared internationally to enhance transparency. This can help  
12  
13 62 facilitate cross-border movement, while guaranteeing high-quality patient care.  
14  
15  
16  
17

18 64 Word count: 277  
19  
20  
21

22 66 **Key words:** Recertification; Continuing Professional Development; Performance assessment;  
23  
24 67 Patient safety; Quality assurance; Professional mobility  
25  
26  
27

### 28 69 **Strengths and limitations of this study**

- 30  
31 70 • Our research provides a comprehensive comparison of ten European recertification sys-  
32  
33 71 tems and their assessment criteria used to ensure quality of care delivered. It highlights  
34  
35 72 how physicians' knowledge and competence are assessed, which stakeholders are in-  
36  
37 73 volved and how the processes are regulated.  
38  
39 74 • Our research focuses on European countries only as free cross-border movement of pro-  
40  
41 75 fessionals is unique to the European context.  
42  
43 76 • We cannot exclude that interregional variations were missed because recertification sys-  
44  
45 77 tems were decentralized in some countries and we explored the national level only.  
46  
47 78 • The diversity and ambiguity in terminology (recertification, revalidation, continuing pro-  
48  
49 79 fessional development) underline the challenge of comparing various recertification sys-  
50  
51 80 tems.  
52  
53  
54  
55  
56  
57  
58  
59  
60

1  
2  
3  
4  
5 81 **Doctors on the move: a European case study on the key characteristics of national recer-**  
6  
7 82 **tification systems**

9  
10 83 **INTRODUCTION**

11  
12 84 Increased mobility of health professionals can pose potential threats to the quality of care.  
13  
14 85 Suppose, for instance, a high performing, Romanian doctor moves to the Netherlands. There,  
15  
16 86 this person will face a new work environment in a distinct healthcare system with specific  
17  
18 87 quality guidelines, and different morbidity patterns, and patient demands. As this new work  
19  
20 88 setting requires specific knowledge, skills, and values that differ from the Romanian context  
21  
22 89 and culture, you may wonder: Will this doctor still be competent to deliver high-quality care?

23  
24  
25 90 While the problem of safeguarding quality of care across borders is omnipresent, it is  
26  
27 91 particularly pertinent in Europe where the free movement of professionals has long historical  
28  
29 92 and legal roots. Although a European Commission directive has facilitated mobility by  
30  
31 93 providing for international recognition of professional qualifications, it fails to guarantee that  
32  
33 94 doctors actually meet the minimum and context-specific quality standards. To safeguard qual-  
34  
35 95 ity of patient care, regulatory bodies around the world have implemented different systems,<sup>1 2</sup>  
36  
37 96 such as recertification systems. Recertification entails lifelong learning and periodic assess-  
38  
39 97 ment of doctors' competence and performance through various methods.<sup>3</sup> It describes the pro-  
40  
41 98 cess designed to promote and demonstrate continuous professional competence.<sup>4</sup> More specif-  
42  
43 99 ically, it requires a formal procedure of assessing and attesting quality of service provided "in  
44  
45 100 accordance with established requirements or standards."<sup>5</sup> By renewing initial certification,  
46  
47 101 *recertification* aims to address any decline in performance as well as ensure trained doctors'  
48  
49 102 adaptation to advances in knowledge and technology.<sup>6 7</sup> This is particularly important in times  
50  
51 103 of increased publicity over individual failures of medical performance, demands for doctors'  
52  
53 104 accountability, and concerns about patient safety.<sup>8</sup>

1  
2  
3  
4  
5 105 Despite its well-intended aim, recertification harbours two inherent problems. First,  
6  
7 106 current national recertification practices fail to ensure quality of care internationally, as they  
8  
9 107 assess doctors' competence and performance in accordance with *national* quality standards.  
10  
11 108 Differences in standards across countries and the absence of international recertification sys-  
12  
13 109 tems may complicate international quality assurance and quality improvement.<sup>7</sup> This begs the  
14  
15 110 question of whether such discrete practices can respond to repeated calls for international ac-  
16  
17 111 countability and transparency.<sup>4</sup> Second, although research on assessment of professional  
18  
19 112 competence provided a set of guidelines for assessment criteria to ensure high quality assess-  
20  
21 113 ment,<sup>9</sup> the question on how to assess doctors' competence has often turned into a political  
22  
23 114 rather than an educational one,<sup>10</sup> potentially impacting on effectiveness of recertification sys-  
24  
25 115 tems.

26  
27  
28  
29 116 "Competence" is defined as the ability to integrate knowledge, skills, and attitudes into  
30  
31 117 a certain context to ensure safe patient care.<sup>11 12</sup> This definition suggests to pay balanced at-  
32  
33 118 tention to multiple competency domains relevant to a doctor, when assessing professional  
34  
35 119 competence.<sup>13</sup> Indeed, many scholars and institutions advocate the assessment of not only  
36  
37 120 medical knowledge and skills, but also competencies, such as communication, collaboration,  
38  
39 121 and clinical judgment, as well as cultural competence or critical consciousness.<sup>14-16</sup> Assess-  
40  
41 122 ment measures must also be robust and focus on the healthcare system's needs and outcomes,  
42  
43 123 implying involvement of key stakeholders, particularly patients when evaluating quality of  
44  
45 124 care.<sup>17-20</sup> It is furthermore acknowledged that, for each of the competencies, outcomes of dif-  
46  
47  
48 125 ferent assessment methods must be combined to ensure robust decision making about profes-  
49  
50 126 sional competence<sup>21 22</sup>

51  
52 127 To conclude, cross-border quality of care will be promoted if countries not only share their  
53  
54 128 recertification practices, but also are willing to critically reflect on quality of assessment pro-  
55  
56  
57  
58  
59  
60

cesses embedded in recertification procedures.<sup>8 23</sup> In the present study, we attempt taking a first step in this direction by identifying different national recertification approaches. The question of the present study, therefore, was what are the key characteristics of recertification systems for doctors of different countries? More specifically, we aimed at exploring use of assessment criteria in design of recertification procedures. We used a collective case study design to describe and compare different national systems. We were particularly interested in the assessment criteria used, if any, and how they were applied. Although recertification is sometimes also coined “revalidation,” “re-accreditation,” and “maintenance of certification” or used interchangeably with “continuing professional development” in other contexts, this article keeps to the former term. The article builds on previous work on certification but primarily focuses on recertification.

## METHODS

### Study Design and Case Selection

We described and analysed the recertification systems of ten individual European countries. Each country’s national recertification system represented a single case. We selected our cases using purposeful sampling to reach maximum heterogeneity in terms of geographical spread across Europe, demographics, health professionals’ migration profile, and type of healthcare system (Table 1).<sup>24</sup>

**Table 1.** *Sampling criteria*

| Sampling criterion         | Specification of criterion                                                                                                                                                                 |
|----------------------------|--------------------------------------------------------------------------------------------------------------------------------------------------------------------------------------------|
| <b>Geographical spread</b> | Include countries of different sizes, demographic make-up, with different cultures, and from a range of geographical locations (Northern, Eastern, Southern, Western, and Central Europe). |

---

|                                       |                                                                                                                                                                                                                                                             |
|---------------------------------------|-------------------------------------------------------------------------------------------------------------------------------------------------------------------------------------------------------------------------------------------------------------|
| <b>Migration profile and position</b> | Include countries that have different levels of health professional migration (inflow and outflow) and rely more or less on foreign doctors; include both “junior” (EU12) and “senior” EU member states (EU15) as indicated by the length of EU membership. |
| <b>Different healthcare systems</b>   | Include countries with different structures of healthcare services in terms of how they are financed and covered by the insurance system (publicly, privately, or both).                                                                                    |

---

149

150 EU2 = countries which joined the EU in 2007: Bulgaria and Romania.

151 EU10 = countries which joined the EU in 2004: Cyprus, Czech Republic, Estonia, Hungary,  
152 Latvia, Lithuania, Poland, Slovakia, and Slovenia.153 EU12 = EU2 and EU10 countries: Cyprus, Czech Republic, Bulgaria, Estonia, Hungary, Lat-  
154 via, Lithuania, Poland, Romania, Slovakia, and Slovenia.155 EU15 = countries which were already EU member states in 2003: Austria, Belgium, Den-  
156 mark, Finland, France, Germany, Greece, Ireland, Italy, Luxembourg, the Netherlands, Portu-  
157 gal, Spain, Sweden, and the UK.

158

159 Based on these criteria, the final study sample included Denmark, Germany, Hungary,

160 Ireland, Poland, Portugal, Spain, Switzerland, the Netherlands, and the United Kingdom (Ta-

161 ble 2).

162 **Table 2.** *Overview of selected countries and their health insurance systems, their coverage, and the existence of a gatekeeper system*<sup>25-33</sup>

| Country  | Geographic location | Net migration rate (migrants/1,000 inhabitants) <sup>34</sup> | % of foreign-trained doctors, latest available year <sup>24 35 36</sup> | Type of health insurance system                                                                   | Financing of healthcare                                                                    |
|----------|---------------------|---------------------------------------------------------------|-------------------------------------------------------------------------|---------------------------------------------------------------------------------------------------|--------------------------------------------------------------------------------------------|
| Denmark  | North               | 2.25                                                          | 5.27%                                                                   | Decentralized, offers universal and nearly free access                                            | Taxation                                                                                   |
| Germany  | Central             | 1.06                                                          | 10.26%                                                                  | Mix of compulsory public and voluntary private health insurance; highly decentralized             | Statutory insurance, taxation, out-of-pocket payments, and private health insurance        |
| Hungary  | East                | 1.34                                                          | 7.79%                                                                   | National Health Insurance Fund is state-owned and offers complete coverage, partly free of charge | Taxation and social health insurance contributions                                         |
| Ireland  | West                | 3.31                                                          | 41.6%                                                                   | National Healthcare System, Mix of public and voluntary private health insurance                  | Taxation and supported by co-payments for specialist's treatment from insurance providers. |
| Poland   | East                | -0.47                                                         | 1.8%                                                                    | Decentralized, mandatory health insurance system                                                  | National Health Funds                                                                      |
| Portugal | South               | 2.74                                                          | 7.74%                                                                   | Private and public insurance schemes plus voluntary private                                       | Taxation, public and private insurance schemes, and direct                                 |



|                      |         |      |        |  | insurances                                                                                                                | payment                                                                         |
|----------------------|---------|------|--------|--|---------------------------------------------------------------------------------------------------------------------------|---------------------------------------------------------------------------------|
| Spain                | South   | 7.24 | 9.4%   |  | National Health Service<br>Private and public insurance<br>schemes                                                        | Taxation and payroll contribu-<br>tions                                         |
| Switzerland          | Central | 5.43 | 27.05% |  | Obligatory, statutory, decentral-<br>ized insurance system<br>Federal Office for Social Insur-<br>ance monitors providers | Compulsory health insurance<br>premiums and out-of-pocket<br>payments           |
| The Nether-<br>lands | Central | 1.97 | 2.13%  |  | Mixed model of compulsory<br>social and voluntary private in-<br>surance                                                  | Health Insurance, taxation and<br>direct payments                               |
| United<br>Kingdom    | West    | 2.56 | 28.07% |  | Mix of public and voluntary pri-<br>vate health insurance                                                                 | National Health Service, taxa-<br>tion, and national insurance<br>contributions |

163

1  
2  
3 164 **Data collection**  
4

5 165 We collected data on the respective recertification procedures by performing a document  
6  
7 166 analysis for each case in addition to conducting semi-structured interviews with two or three  
8  
9 167 representatives from each country.  
10

11 168 For the document analyses, we retrieved documents describing national recertification  
12  
13 169 procedures for doctors from the websites of national certification organizations, and translated  
14  
15 170 them into English if needed. The documents included national recertification schemes and  
16  
17 171 regulations, rules and reports of medical education and training, user guidelines, laws and  
18  
19 172 grey literature articles. We focused on documents that clarified rationale, form and procedure,  
20  
21 173 as well as requirements and rewards of each recertification program.  
22  
23

24 174 To validate and corroborate our interpretation of data from document analysis, we  
25  
26 175 conducted one to three semi-structured interviews with representatives of each national regu-  
27  
28 176 latory body responsible for postgraduate medical education and recertification or the recogni-  
29  
30 177 tion of professional qualifications (e.g., international affairs offices) (N=19). These interview-  
31  
32 178 ees were directors of professional development and practice, heads of recertification depart-  
33  
34 179 ments, experts on continuing professional development, and official secretaries or legal advi-  
35  
36 180 sors to national medical education offices, medical or scientific societies, accreditation bodies,  
37  
38 181 medical royal colleges, councils, or chambers (Table 3).  
39  
40  
41  
42  
43

44 183 **Table 3.** *Number and profile of respondents per country*  
45

| Country investigated | Number of interviews | Profile of respondents |
|----------------------|----------------------|------------------------|
| Netherlands          | 1                    |                        |
| Switzerland          | 2                    |                        |
| Germany              | 3                    |                        |
| United Kingdom       | 2                    |                        |
| Ireland              | 2                    |                        |
| Denmark              | 2                    |                        |

|          |   |
|----------|---|
| Hungary  | 1 |
| Poland   | 2 |
| Portugal | 2 |
| Spain    | 2 |

---

184

185 The first author (CS) conducted all interviews via video or phone, based on an interview pro-  
186 tocol adapted from a study on continuing professional development and lifelong learning for  
187 health professionals.<sup>37</sup> The interview protocol was piloted in the Netherlands. Questions ad-  
188 dressed competency frameworks as well as rules and regulations of recertification, asking  
189 about regulatory authorities involved, main objective(s), structure, requirements, and conse-  
190 quences of compliance or non-compliance. Before the interview, we explained the research  
191 purposes to participants and asked them to give informed consent. Interviews were audio-  
192 taped and lasted 50-90 minutes, during which notes were taken. Notes were subsequently pre-  
193 sented to interviewees to approve or to add information.

194 Data collection took place from April to September, 2016.

### 195 **Patient involvement**

196 No patients were involved in this research, given our specific aim.

### 197 **Data analysis**

198 Data analysis spanned a two-step process. First, we analysed the data from the document  
199 analyses and interviews to identify and describe key characteristics of each case. We asked at  
200 least one interviewee per country to comment on the accuracy and completeness of the de-  
201 scribed recertification system. We subsequently re-analysed the data, specifically focusing on  
202 the application of criteria for high quality assessment: validity, reliability, educational and  
203 catalytic effect.<sup>9 14 38</sup> For that purpose we identified specific strategies used to ensure assess-  
204 ment quality in terms of validity, reliability and educational consequences, for each of the re-

205 certification system (Box 1).

206

207 **Box 1.** *Strategies embedded in recertification, affecting assessment quality*

| Criterion            |                                         | Features                                                                                                                                                                                                                                                                                                                                                                                                                                          |
|----------------------|-----------------------------------------|---------------------------------------------------------------------------------------------------------------------------------------------------------------------------------------------------------------------------------------------------------------------------------------------------------------------------------------------------------------------------------------------------------------------------------------------------|
| What is assessed?    | Program of assessment                   | <ul style="list-style-type: none"> <li>• Inclusion of competency domain(s) or domain(s) of professional practice (including lifelong learning)</li> <li>• Use of overarching framework (based on needs healthcare system; key domains professional practice)</li> <li>• Assessment and learning aligned with individual needs</li> <li>• Focus on process of care</li> <li>• Focus on patient outcome (including patient satisfaction)</li> </ul> |
| When is it assessed? | Frequency of recertification cycle      | <ul style="list-style-type: none"> <li>• Yearly</li> <li>• Every 2-3 years</li> <li>• Every 4-5 years</li> <li>• Every &gt; 5 years</li> <li>• No time frame</li> </ul>                                                                                                                                                                                                                                                                           |
| Who assesses?        | Stakeholders involved in the assessment | <ul style="list-style-type: none"> <li>• Individual (self-assessment)</li> <li>• Peers</li> <li>• Employer</li> <li>• Patients</li> <li>• Others</li> </ul>                                                                                                                                                                                                                                                                                       |
| How is it assessed?  | Assessment methods                      | <ul style="list-style-type: none"> <li>• Competence level according to Miller's assessment pyramid (cognition versus performance)</li> <li>• Self-assessment</li> <li>• Portfolios</li> <li>• Credit collection through course participation</li> <li>• Examinations (standardised)</li> <li>• Simulations</li> <li>• Clinical audits</li> <li>• Multi-source feedback</li> </ul>                                                                 |
|                      | Regulations                             | <ul style="list-style-type: none"> <li>• Voluntary vs. mandatory</li> </ul>                                                                                                                                                                                                                                                                                                                                                                       |

---

|                                                                                                                                                                                                                                                                |                                                                                                                            |                                         |                                                                                                                                                                                                                                 |
|----------------------------------------------------------------------------------------------------------------------------------------------------------------------------------------------------------------------------------------------------------------|----------------------------------------------------------------------------------------------------------------------------|-----------------------------------------|---------------------------------------------------------------------------------------------------------------------------------------------------------------------------------------------------------------------------------|
| 1<br>2<br>3<br>4<br>5<br>6<br>7<br>8<br>9<br>10<br>11<br>12<br>13<br>14<br>15<br>16<br>17                                                                                                                                                                      | What are<br>the objec-<br>tives?                                                                                           | Assessment<br>goal                      | <ul style="list-style-type: none"> <li>• Legal vs. professional obligation</li> <li>• Quality of care and patient safety</li> <li>• Professional development</li> <li>• Maintenance of doctors' knowledge and skills</li> </ul> |
| 18<br>19<br>20<br>21<br>22<br>23<br>24<br>25<br>26<br>27<br>28<br>29<br>30<br>31<br>32<br>33<br>34<br>35<br>36<br>37<br>38<br>39<br>40<br>41<br>42<br>43<br>44<br>45<br>46<br>47<br>48<br>49<br>50<br>51<br>52<br>53<br>54<br>55<br>56<br>57<br>58<br>59<br>60 | 208<br>209<br>210<br>211<br>212<br>213<br>214<br>215<br>216<br>217<br>218<br>219<br>220<br>221<br>222<br>223<br>224<br>225 | Consequenc-<br>es of non-<br>compliance | <ul style="list-style-type: none"> <li>• Loss of license</li> <li>• Financial sanctions</li> <li>• Follow-up</li> <li>• Work under supervision</li> <li>• Feedback</li> </ul>                                                   |

---

208

209        These strategies included program of assessment, assessment goals and methods (i.e.,

210 authentic and suitable methods which aim at measuring day-to-day performance and profes-

211 sional competence), as well as frequency of assessment (i.e., consistent outcomes across

212 measurements and decisions). We also addressed the involvement of different stakeholders

213 including patients, and consequences for learning and development. Self-assessment as tool

214 for lifelong learning and assessment of practice performance were the two major components

215 of recertification considered.<sup>39</sup> Finally, we compared recertification systems across cases to

216 identify similarities and differences with respect to use of the aforementioned assessment cri-

217 teria.

## 218 **RESULTS**

219 In the following paragraphs, we highlight differences and/or similarities across countries in

220 terms of the purpose, focus, frequency, and methods of recertification, and the stakeholders

221 involved in the process. Exact details are provided in Table 4, while Table 5 outlines the bod-

222 ies (Medical specialties, Ministries of Health or Medical Authorities) responsible for recertifi-

223 cation. The final paragraph provides a synopsis of the most striking results.

224 All systems uncovered applied to all registered practicing doctors, irrelevant of whether they

225 were trained nationally or internationally, as they are automatically enrolled in the national

1  
2  
3 226 scheme upon registration.  
4

5 227  
6

7 228 **1. Purpose of recertification**  
8

9 229 As shown in Table 4, the purpose of recertification constituted a major source of variance.  
10

11 230 While several countries aimed to improve quality of care and patient safety, a minority (N=2),  
12

13 231 essentially those countries where recertification was not mandatory, upheld personal devel-  
14

15 232 opment and career advancement as their primary objective (Table 4).  
16  
17  
18  
19  
20  
21  
22  
23  
24  
25  
26  
27  
28  
29  
30  
31  
32  
33  
34  
35  
36  
37  
38  
39  
40  
41  
42  
43  
44  
45  
46  
47  
48  
49  
50  
51  
52  
53  
54  
55  
56  
57  
58  
59  
60

233 **Table 4.** *Competence assessment in recertification systems of investigated cases*

| Case                  | Purpose <sup>1</sup> | Focus <sup>2</sup> |    |                    | Based on competency framework | Frequency         |                   | Assessment methods <sup>3</sup> | Who decides on activities to be followed? |           | Stakeholders involved in the assessment |            |          |           | How is internal quality of assessment assured?           |
|-----------------------|----------------------|--------------------|----|--------------------|-------------------------------|-------------------|-------------------|---------------------------------|-------------------------------------------|-----------|-----------------------------------------|------------|----------|-----------|----------------------------------------------------------|
|                       |                      | LLL                | PP | Mandatory (yes/no) |                               | After ... credits | Every ... year(s) |                                 | Individual doctor                         | Employers | Doctor him/herself                      | Colleagues | Patients | Employers |                                                          |
| <b>Netherlands</b>    | 1, 3                 | +                  | +  | +                  | +                             | 200               | 5                 | 1.4-1.7; 2; 3; 4; 5             | +                                         | -         | +                                       | +          | +        | +         | quality visitations, assessment of group functioning     |
| <b>Switzerland</b>    | 1, 2                 | +                  | +  | +                  | N/A                           | 150               | 3                 | 1.1-1.7; 2; 3                   | +                                         | -         | +                                       | +          | -        | -         | N/A                                                      |
| <b>Germany</b>        | 1, 3                 | +                  | -  | +                  | N/A                           | 250               | 5                 | 1.1-1.4; 1.6-1.8                | +                                         | -         | +                                       | -          | -        | -         | accreditation of CME providers                           |
| <b>United Kingdom</b> | 1, 2, 3              | +                  | +  | +                  | +                             | ~250              | 5                 | 1.1-1.4; 1.6; 1.7; 2; 3; 4; 7   | +                                         | -         | +                                       | +          | +        | +         | independent assessors, information triangulation, audits |
| <b>Ireland</b>        | 3                    | +                  | +  | +                  | +                             | 50                | 1                 | 1.2-1.6; 2                      | +                                         | -         | +                                       | -          | -        | -         | N/A                                                      |
| <b>Denmark</b>        | 1, 2                 | -                  | +  | -                  | -                             | N/A               | 1                 | 1; 3; 4                         | +                                         | +         | +                                       | -          | -        | +         | local management                                         |
| <b>Hungary</b>        | 2                    | +                  | -  | +                  | N/A                           | 250               | 5                 | 1.1; 1.2; 1.6-1.8; 4; 5; 6      | +                                         | -         | +                                       | -          | -        | -         | more credits for CPD activities with exams               |

1  
2  
3  
4  
5  
6  
7  
8  
9  
10  
11  
12  
13  
14  
15  
16  
17  
18  
19  
20  
21  
22  
23  
24  
25  
26  
27  
28  
29  
30  
31  
32  
33  
34  
35  
36  
37  
38  
39  
40  
41  
42  
43  
44  
45  
46  
47

|                 |   |   |   |   |     |     |   |                      |   |   |   |   |   |     |                                        |
|-----------------|---|---|---|---|-----|-----|---|----------------------|---|---|---|---|---|-----|----------------------------------------|
| <b>Poland</b>   | 3 | + | - | + | N/A | 200 | 4 | 1.1; 1.2;<br>1.4-1.7 | + | - | + | - | - | -   | accreditation<br>of CME<br>providers   |
| <b>Portugal</b> | 4 | + | + | - | N/A | N/A | 5 | 4                    | + | - | - | + | - | (+) | N/A                                    |
| <b>Spain</b>    | 4 | + | + | - | +   | N/A | 3 | 1.2;<br>4            | + | - | + | + | - | +   | organization's<br>quality con-<br>trol |

234

235 <sup>1</sup>. Recertification purpose: 1. Quality of care; 2. Patient safety; 3. Maintenance of doctors' knowledge and skills; 4. Career.

236 <sup>2</sup>. Focus of recertification: LLL = lifelong learning; PP = Practice performance.

237 <sup>3</sup>. Assessment methods:

238 1. CPD: [ 1.1 specialty-specific CPD course; 1.2 General CPD course (communication skills); 1.3 Individual learning (reading); 1.4 Conference attend-  
239 ance; 1.5 Teaching; 1.6 Research & scientific publications; 1.7 E-learning; 1.8 Time spent as visiting professional]

240 2. Clinical audit;

241 3. Appraisal/peer reviews;

242 4. Portfolio;

243 5. Minimum hours of patient contact;

244 6. Mandatory intensive course;

245 7. Significant events.

246 yes = + , no = -

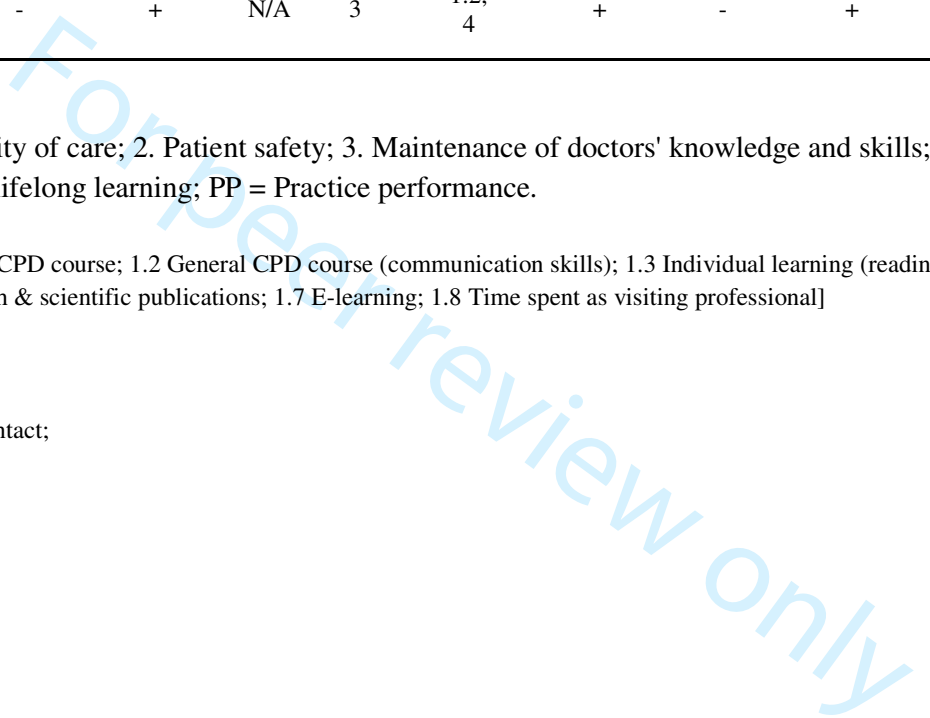



247 Participation in a recertification program was voluntary in three countries only, Den-  
 248 mark, Spain and Portugal, though all countries imposed a professional or legal obligation to  
 249 engage in lifelong learning. Consequences of non-compliance were non-existent in volun-  
 250 tary systems; in the mandatory systems (N=7), however, they varied from financial sanc-  
 251 tions (Switzerland and Germany) or work under supervision to suspension of the license to  
 252 practice (Germany, the UK, Hungary and partly the Netherlands), with two countries allow-  
 253 ing for license recovery. Finally, one country conferred a lifelong registration upon doctors,  
 254 obviating the need to impose any sanctions in practice (Table 5).

255

256 **Table 5.** Regulation of recertification process in the countries under scrutiny

| Case           | Who sets rules for recertification? |                    |                                |                                 | Potential <sup>257</sup>                    |
|----------------|-------------------------------------|--------------------|--------------------------------|---------------------------------|---------------------------------------------|
|                | Medical Specialties                 | Ministry of Health | Medical Authority <sup>1</sup> | Type of obligation <sup>2</sup> | consequences of non-compliance <sup>3</sup> |
| Netherlands    | yes                                 | yes                | yes                            | 1                               | (1), 2                                      |
| Switzerland    | yes                                 | no                 | no                             | 1,2                             | 3, 4                                        |
| Germany        | no                                  | yes                | yes                            | 1,2                             | 1, 3                                        |
| United Kingdom | no                                  | no                 | yes                            | 1,2                             | 1, 2                                        |
| Ireland        | yes                                 | no                 | yes                            | 1                               | 4, 5                                        |
| Denmark        | /                                   | /                  | yes                            | 2                               | 4                                           |
| Hungary        | /                                   | yes                | yes                            | 1                               | 1                                           |
| Poland         | /                                   | yes                | yes                            | 1                               | 4                                           |
| Portugal       | /                                   | /                  | /                              | /                               | 4                                           |
| Spain          | yes                                 | /                  | yes                            | 1                               | 4                                           |

258 <sup>1</sup> Medical Authority such as the General Medical Council259 <sup>2</sup> Type of obligation: 1. Legal; 2. Professional260 <sup>3</sup> Potential consequences of non-compliance are: 1. Work supervised or suspen-  
 261 sion of license; 2. Suspension of license with possibility to restore license; 3. Fi-  
 262 nancial sanctions; 4. No formal consequences / license for lifetime; 5. Follow-up.

263

Information obtained from interviews confirmed information from documents with the exception of handling of con-compliance: compared to the rules laid down in official documents, interviewees reported a more lenient handling of con-compliance in practice.

267

## 2. Focus of the assessment

As regards focus, almost all recertification systems emphasized the lifelong learning of doctors. Likewise, most systems relied on the collection of a minimum number of credits per year, mostly 50 (N=5), where one credit typically represented one hour of learning activity. Although the three voluntary systems did not require credits to be earned for recertification, one did recommend it (Denmark). Such practice was often embedded in a continuing professional development framework as part of a voluntary recertification process. In Hungary doctors must take a specific course followed by an exam. Generally, they received more credits for courses if these were concluded with an examination. Of the countries that assessed practice performance, only five did so through audits and appraisals or multi-source feedback. Four countries evaluated doctors' individual and team functioning focusing on communication and collaboration skills.

280

## 3. Frequency of recertification

The frequency of recertification and timeframe within which requirements must be fulfilled varied widely: some countries had annual appraisals (N=2), others three-year procedures (N=2), but most of the countries undertook quinquennial assessments (N=5).

285

## 4. Assessment methods

To demonstrate their knowledge and engagement in lifelong learning, doctors in most coun-

1  
2  
3 288 tries must earn credits, for instance by participating in workshops and national or international  
4  
5 289 conferences, doing individual reading, teaching, writing scientific articles, spending time as  
6  
7 290 visiting doctor, and/or e-learning. Denmark assessed performance on the basis of a dialog  
8  
9 291 between employer and employee who jointly discussed learning needs. The United Kingdom  
10  
11 292 counted reflection on significant events, that is, unintended critical events which potentially  
12  
13 293 harmed the patient, to measure patient outcomes. Yet other countries (N=4) used clinical au-  
14  
15 294 dits, number of complaints, reviews or appraisals, and peer reviews to measure processes of  
16  
17 295 healthcare delivery. Finally, some countries deployed portfolios (N=6), clinical audits (N=4),  
18  
19 296 and multi-source feedback (N=4) to reflect on individual and team functioning.  
20  
21  
22  
23  
24

## 25 298 **5. Stakeholder involvement**

26  
27 299 In most cases (N=9), doctors decided which learning activities to take based on their self-  
28  
29 300 assessed learning needs. Several countries, however, also based the assessment of perfor-  
30  
31 301 mance outcomes and the process of care on feedback from peers (N=5) or patients (N=2), yet  
32  
33 302 only one country (The UK) demanded involving patients in the assessment regularly.  
34  
35  
36

## 37 304 **6. Synopsis**

38  
39 305 All things considered, what stood out was that most recertification systems relied heavily on  
40  
41 306 doctors' self-assessments, attached little weight to patient outcomes, patient involvement, and  
42  
43 307 the assessment of practice performance, as well as lacked an overarching competency frame-  
44  
45 308 work. Only four countries seem to match the content of assessment programs with evaluation  
46  
47 309 of professional practice. These findings clearly contrast with the aim to ensure quality of care  
48  
49 310 and patient safety most systems pursued. Evaluation of practice performance seems to be a  
50  
51 311 *sine qua non*, an indispensable condition, for assessment of competence, i.e. what doctors  
52  
53 312 actually do in day-to-day practice. Two countries (the Netherlands and the UK), however, did  
54  
55  
56  
57  
58  
59

1  
2  
3 313 use a more comprehensive system, covering both self-assessment and practice performance  
4  
5 314 through multi-source feedback, including patients' feedback.  
6

7 315 Three other countries deserve mention for their apparent distinctness from the rest.  
8  
9 316 Denmark, though not formally requiring continuing professional development, assessed prac-  
10  
11 317 tice performance based on an annual dialog between doctor and employer. This left little room  
12  
13 318 for individual doctors to self-assess their performance and independently decide on activities  
14  
15 319 to be taken, which was the case in all other countries where the individual doctor was respon-  
16  
17 320 sible for high-quality patient care. The systems in Spain and Portugal stood out as being ca-  
18  
19 321 reer-focused: they did not require doctors to engage in lifelong learning and professional de-  
20  
21 322 velopment for purposes of patient safety and quality patient care, but rather encouraged the  
22  
23 323 use of a portfolio to enhance chances of promotion.  
24  
25  
26

## 27 324 **DISCUSSION**

28  
29 325 The purpose of this study was to investigate how recertification is organized across different  
30  
31 326 countries. We found substantial differences in recertification requirements and procedures.  
32  
33 327 Moreover, these requirements in many respects seemed to conflict with aims to ensure quality  
34  
35 328 of care and patient safety.  
36  
37

38 329 First, we observed that only a few systems included feedback from patients in the as-  
39  
40 330 sessment. Involving patients in assessing quality of healthcare and doctor performance seems  
41  
42 331 inevitable for accountability and transparency purposes.<sup>40</sup> Although many patients are needed  
43  
44 332 to obtain reliable evaluations, their involvement in recertification procedures can help respond  
45  
46 333 to public calls for doctors' accountability.<sup>9</sup> Wright et al recommend including data from 34  
47  
48 334 patient questionnaires and 15 colleague questionnaires to obtain reliable performance evalua-  
49  
50 335 tion for appraisal purposes.<sup>41</sup> Despite the fact that the literature reports peers to give accurate,  
51  
52 336 credible, and valid assessments of performance, peer feedback was absent in most systems  
53  
54 337 investigated but is for example employed in some Canadian provinces.<sup>9 14 42 43</sup> Use of multi-  
55  
56  
57  
58  
59

1  
2  
3 338 source feedback to assess practice performance, requires high quality and credible feedback to  
4  
5 339 induce reflection on practice.<sup>44</sup> Multi-source feedback, including patients' feedback, can be  
6  
7 340 especially effective when the feedback received contrasts with individual perceptions and is  
8  
9 341 facilitated by a mentor or coach.<sup>45</sup> A mentor can help to deal with the emotional aspects of the  
10  
11 342 multi-source feedback and to structure individual reflection and follow-up.<sup>46</sup> Use of multi-  
12  
13 343 source feedback and mentoring systems could thus help countries transitioning from a system  
14  
15 344 based on self-assessments to "directed" self-assessments as suggested by Sargeant et al.<sup>47</sup>

16  
17  
18 345 Second, most systems relied on self-assessments and lifelong learning activities doc-  
19  
20 346 tors selected themselves without attending to external assessment of practice performance.  
21  
22 347 More specifically, by relying on credit accumulation systems that allowed doctors to choose  
23  
24 348 their learning activities,<sup>48</sup> it was entirely at the doctors' discretion to judge their performance  
25  
26 349 and learning needs. There's strong evidence however, that several individual and social fac-  
27  
28 350 tors obscure the validity of self-assessments such as age and experience.<sup>48 49</sup> Additionally,  
29  
30 351 self-assessments tend to mirror self-confidence and self-efficacy which are not necessarily  
31  
32 352 good measures of doctors' competence.<sup>48</sup> This evidence provides ample ground to question  
33  
34 353 both the effectiveness of recertification systems that rely on doctors' self-assessments and the  
35  
36 354 autonomy granted to clinicians.<sup>17 50</sup> Hence, assessments of competence will become more  
37  
38 355 meaningful when they involve multiple assessors, including patients.

39  
40  
41  
42 356 Another deviation from the purpose of recertification constituted the assessment meth-  
43  
44 357 ods used. Whereas activities such as reading written materials, and attending conferences or  
45  
46 358 presentations have been shown to deepen specific knowledge, there is no evidence that such  
47  
48 359 didactic and passive learning interventions alone improve performance and patient  
49  
50 360 outcomes.<sup>51-53</sup> A causal link between educational activities and improved patient health status  
51  
52 361 yet remains to be established.<sup>54</sup> This casts doubt on the impact of the recertification systems in  
53  
54 362 our study on doctors' performance. Consequently, our findings reinforce concerns about the  
55  
56  
57  
58  
59  
60

1  
2  
3 363 validity of recertification procedures and emphasize the need to combine various assessment  
4  
5 364 methods, likely resulting in greater accountability as previously been proven.<sup>55</sup> As stated by  
6  
7 365 Forsetlund and colleagues (2009), a combination of multiple media, multiple instructional  
8  
9 366 techniques and multiple exposures can help to induce change in performance towards im-  
10  
11 367 proved patient outcomes.<sup>56</sup>

12  
13  
14 368 Other non-European countries have experienced similar challenges in implementing  
15  
16 369 adequate assessment methods for recertification purposes.<sup>4 43 57 58</sup> Also Australia and North  
17  
18 370 America investigate new methods to evaluate competence and practice performance, cautious-  
19  
20 371 ly moving away from self-assessment.<sup>4 43 58</sup>

21  
22 372 Since medical specialists invest substantial time and money in their professional de-  
23  
24 373 velopment, the feasibility, applicability, and acceptability of recertification are topics worth  
25  
26 374 exploring in the context of quality assurance. We therefore invite future studies into stake-  
27  
28 375 holders' perceptions of recertification and their effectiveness and impact,<sup>59</sup> and also to bring  
29  
30 376 into focus the content and formal aspects of learning activities which, by facilitating its design  
31  
32 377 and implementation, may improve recertification. To shed light on the full picture, we would  
33  
34 378 furthermore welcome studies investigating the feasibility and acceptability of involving pa-  
35  
36 379 tients in evaluating physicians' competency.

### 380 **Limitations**

381 Since recertification systems were decentralized in some countries and we explored the na-  
382 tional level only, we cannot exclude that interregional variations were missed. Moreover, alt-  
383 hough the interviewees ideally represented at least two different national organizations, inter-  
384 views were mostly limited to two or three respondents per country. A final and possibly the  
385 most complex and intervening limitation constituted the diversity in terminology and lan-  
386 guage. This may have affected the translation of national concepts into English during the  
387 interviews and of written descriptions, potentially causing loss of detail during the analyses.

1  
2  
3 388 These language differences and ambiguity in terms underline the challenge of comparing var-  
4  
5 389 ious recertification systems.  
6  
7

### 8 390 **Practical implications for professional mobility**

9  
10 391 Defining universal criteria for assessing professional competence will be no easy feat,  
11  
12 392 especially not when considering the differences between national recertification approaches,  
13  
14 393 rising cross-border mobility. Since each system is customized to a specific context, culture,  
15  
16 394 and healthcare system, a universal recertification system may neither be desirable nor achiev-  
17  
18 395 able, as doctors are required to consciously reflect on the local culture, and adapt to the  
19  
20 396 unique features of their work setting and health care system.<sup>16</sup> To our knowledge, currently  
21  
22 397 there is no requirement or overarching effort in striving towards harmonising recertification  
23  
24 398 processes across countries within the European Union. Its member states have agreed that  
25  
26 399 each individual country will remain responsible for national health care affairs, without Euro-  
27  
28 400 pean regulations interfering. Moving towards a standardised system would however require  
29  
30 401 an EU-wide regulation, which is currently interrupted by those strong nationally regulatory  
31  
32 402 powers. For transparency purposes, however, national bodies and medical societies could  
33  
34 403 share their competency assessment procedures and quality standards, turning a political matter  
35  
36 404 into an educational (and quality assurance) matter.<sup>8</sup> Moreover, national bodies can incorporate  
37  
38 405 performance evaluation, involve multiple stakeholders including patients, and use other as-  
39  
40 406 sessments besides clinicians' self-assessments in their re-certification procedures to enhance  
41  
42 407 liability.<sup>60</sup> Considering the increasing internationalisation of healthcare, doctors' cultural  
43  
44 408 competency should also be incorporated into recertification programmes.  
45  
46  
47  
48

49 409 Achieving an overarching quality assurance system being an unrealistic goal, we need  
50  
51 410 to have a shared understanding of what are minimum standards for a doctor<sup>50</sup> thereby creating  
52  
53 411 a base for international comparison while allowing for local adaptations. This however asks  
54  
55 412 for an increased collaboration between countries and understanding of differences inherent to  
56  
57  
58  
59  
60

1  
2  
3 413 each system and culture. Such standards of training content and certification directives could  
4  
5 414 meet the challenges posed by the free, cross-border movement of professionals, improving  
6  
7 415 patient safety, and enhancing accountability and transparency.  
8  
9

## 10 416 **Conclusion**

11  
12 417 Recertification can help assess and improve knowledge, skills, professional performance, and,  
13  
14 418 ultimately, patient outcomes. Yet, systems vary widely across countries in terms of being  
15  
16 419 compulsory or not, requirements, patient involvement, and consequences of compliance or  
17  
18 420 non-compliance. A shift toward a broader program of assessment focused on competence as-  
19  
20 421 sessment and lifelong learning might create a more valid, credible, and reliable basis for  
21  
22 422 recertification, meeting growing demands for accountability and transparency.  
23  
24  
25

26 423

27 424 Acknowledgements: We would like to thank Professor Dame Lesley Southgate, FRCGP,  
28  
29 425 FRCP, MClIn, Sci, for contributing to this manuscript with discussing the study design and  
30  
31 426 suggesting possible interview partners. Angelique van den Heuvel provided help in form of  
32  
33 427 language editing, which we highly appreciated. Furthermore, we would like to thank all inter-  
34  
35 428 viewees for their contribution.  
36  
37

38 429

39  
40 430 Contributors: CS wrote the research plan, collected, cleaned and analysed the data, and draft-  
41  
42 431 ed and revised the paper. She is guarantor. All authors were involved with conceptualizing the  
43  
44 432 research. MG analysed the data, and drafted and revised the paper. SM revised the paper. GR  
45  
46 433 drafted and revised the paper. FS drafted and revised the paper. ED analysed the data, drafted  
47  
48 434 and revised the draft paper.  
49

50 435

51  
52  
53 436 Funding statement: Carolin Sehlbach is a PhD student at Maastricht University, on a project  
54  
55 437 funded by the European Respiratory Society. The research conducted by Carolin Sehlbach is  
56  
57  
58  
59



1  
2  
3 438 however independent from this funding.  
4

5 439

6  
7 440 Competing interests: None declared. All authors have completed the *Unified Competing In-*  
8  
9 441 *terest* form (available on request from the corresponding author).  
10

11 442

12  
13 443 Ethical Approval: Ethical approval was obtained from the Netherlands Association for Medi-  
14  
15 444 cal Education (NVMO; file number 669).  
16  
17

18 445

19  
20 446 Data sharing: The dataset(s) supporting the conclusions of this article is available from the  
21  
22 447 author upon request by emailing the corresponding author.  
23  
24

25 448

26  
27 449 Transparency declaration: Carolin Sehlbach affirms that the manuscript is an honest, accurate,  
28  
29 450 and transparent account of the study being reported; that no important aspects of the study  
30  
31 451 have been omitted; and that any discrepancies from the study as planned (and, if relevant,  
32  
33 452 registered) have been explained.  
34  
35  
36  
37  
38  
39  
40  
41  
42  
43  
44  
45  
46  
47  
48  
49  
50  
51  
52  
53  
54  
55  
56  
57  
58  
59  
60

## 453 REFERENCES

- 454 1. Peck C, McCall M, McLaren B, et al. Continuing medical education and continuing professional  
455 development: international comparisons. *BMJ* 2000;320(7232):432-35. doi:  
456 10.1136/bmj.320.7232.432
- 457 2. Horsley T, Grimshaw J, Campbell C. Maintaining the competence of Europe's workforce. *BMJ* 2010;341  
458 doi: 10.1136/bmj.c4687
- 459 3. Ahmed K, Khan RS, Darzi A, et al. Recertification: What do specialists think about skill assessment?  
460 *Surgeon* 2013;11(3):120-24. doi: <http://dx.doi.org/10.1016/j.surge.2012.12.004>
- 461 4. Shaw K, Cassel CK, Black C, et al. Shared medical regulation in a time of increasing calls for  
462 accountability and transparency: Comparison of recertification in the United States, Canada, and the  
463 United Kingdom. *JAMA* 2009;302(18):2008-14. doi: 10.1001/jama.2009.1620
- 464 5. Bach S. International migration of health workers: Labour and social issues. In: Office IL, ed. Geneva,  
465 2003.
- 466 6. Choudhry NK, Fletcher RH, Soumerai SB. Systematic Review: The Relationship between Clinical  
467 Experience and Quality of Health Care. *Ann Intern Med* 2005;142(4):260-73. doi: 10.7326/0003-  
468 4819-142-4-200502150-00008
- 469 7. Ahmed K, Wang TT, Ashrafian H, et al. The effectiveness of continuing medical education for specialist  
470 recertification. *Can Urol Assoc J* 2013;7(7-8):266-72. doi: 10.5489/cuaj.378 [published Online First:  
471 2013/09/14]
- 472 8. Boulet J, van Zanten M. Ensuring high-quality patient care: the role of accreditation, licensure, specialty  
473 certification and revalidation in medicine. *Med Educ* 2014;48(1):75-86. doi: 10.1111/medu.12286  
474 [published Online First: 2013/12/18]
- 475 9. Norcini J, Anderson B, Bollela V, et al. Criteria for good assessment: Consensus statement and  
476 recommendations from the Ottawa 2010 Conference. *Med Teach* 2011;33(3):206-14. doi:  
477 10.3109/0142159X.2011.551559
- 478 10. Brightwell A, Grant J. Competency-based training: who benefits? *Postgrad Med J* 2013;89(1048):107-10.  
479 doi: 10.1136/postgradmedj-2012-130881
- 480 11. Frank JR, Snell LS, Cate OT, et al. Competency-based medical education: theory to practice. *Med Teach*  
481 2010;32(8):638-45. doi: 10.3109/0142159X.2010.501190
- 482 12. Iobst WF, Sherbino J, Cate OT, et al. Competency-based medical education in postgraduate medical  
483 education. *Med Teach* 2010;32(8):651-56. doi: 10.3109/0142159x.2010.500709
- 484 13. Mulder H, Cate OT, Daalder R, et al. Building a competency-based workplace curriculum around  
485 entrustable professional activities: the case of physician assistant training. *Med Teach*  
486 2010;32(10):e453-e59. doi: 10.3109/0142159x.2010.513719
- 487 14. Epstein RM, Hundert EM. Defining and assessing professional competence. *JAMA* 2002;287(2):226-35.  
488 doi: 10.1001/jama.287.2.226
- 489 15. Frank JR. The CanMEDS 2005 physician competency framework: Better standards, better physicians,  
490 better care: Royal College of Physicians and Surgeons of Canada 2005.
- 491 16. Kumagai AK, Lypson ML. Beyond Cultural Competence: Critical Consciousness, Social Justice, and  
492 Multicultural Education. *Acad Med* 2009;84(6):782-87. doi: 10.1097/ACM.0b013e3181a42398
- 493 17. Epstein RM. Assessment in Medical Education. *N Engl J Med* 2007;356(4):387-96. doi:  
494 doi:10.1056/NEJMra054784
- 495 18. Horowitz SD. Invited Article: Maintenance of certification: the next phase in assessing and improving  
496 physician performance. *Neurology* 2008;71(8):605-9. doi: 10.1212/01.wnl.0000323936.44568.a6
- 497 19. Lipner RS, Hess BJ, Phillips RL. Specialty Board Certification in the United States: Issues and Evidence.  
498 *J Contin Educ Health Prof* 2013;33(S1):S20-S35. doi: 10.1002/chp.21203
- 499 20. Miller GE. The assessment of clinical skills/competence/performance. *Acad Med* 1990;65(9):S63-7. doi:  
500 10.1097/00001888-199009000-00045
- 501 21. Jamtvedt G, Young, JM., Kristoffersen, DT., O'Brien, MA., Oxman, AD. Audit and feedback: effects on  
502 professional practice and health care outcomes (Review). *Cochrane Libr* 2007(4) doi:  
503 10.1002/14651858.CD000259.pub3
- 504 22. Ivers N, Jamtvedt G, Flottorp S, et al. Audit and feedback: effects on professional practice and healthcare

- 1  
2  
3  
4 505 outcomes. *Cochrane Database Syst Rev* 2012(6):Cd000259. doi: 10.1002/14651858.CD000259.pub3  
5 506 [published Online First: 2012/06/15]  
6 507 23. Godlee F. European countries need to work together. *BMJ* 2010;341 doi: 10.1136/bmj.c5395  
7 508 24. Aiken L, Bidwell P, Brugha R, et al. Health professional mobility in a changing Europe: new dynamics,  
8 509 mobile individuals and diverse responses: The European Observatory on Health Systems and  
9 510 Policies 2014.  
10 511 25. Simões J AG, Fronteira I, Hernández-Quevedo C. Portugal: Health system review. *Health Syst Transit:*  
11 512 *The European Observatory on Health Systems and Policies*, 2017.  
12 513 26. Jakubowski E, Busse R. Health Care Systems in the EU - a comparative study. In: Chambers GR, ed.  
13 514 Luxembourg: European Parliament, 1998.  
14 515 27. Jacobs R, Goddard M. Social health insurance systems in European countries: the role of the insurer in the  
15 516 health care system: a comparative study of four European countries, 2000.  
16 517 28. Mossialos E, Wenzl M, Osborn R, et al. International profiles of health care systems, 2014. New York,  
17 518 NY: The Commonwealth Fund, 2015.  
18 519 29. Cylus J RE, Findley L, Longley M, O'Neill C, Steel D. United Kingdom: Health system review. In: Busse  
19 520 R, Figueras J, McKee M, et al., eds. *Health Syst Transit: The European Observatory on Health*  
20 521 *Systems and Policies*, 2015.  
21 522 30. McDaid D WM, Maresso A and Mossialos E. Ireland: Health system review. In: Busse R, Figueras J,  
22 523 McKee M, et al., eds. *Health Syst Transit: The European Observatory on Health Systems and*  
23 524 *Policies*, 2009.  
24 525 31. Sagan A, Panteli D, Borkowski W, et al. Poland: Health system review. In: Busse R, Figueras J, McKee  
25 526 M, et al., eds. *Health Syst Transit: The European Observatory on Health Systems and Policies*  
26 527 2011:1-193.  
27 528 32. Garcia-Armesto S, Abadía-Taira M, Durán A, et al. Spain: Health system review. In: Busse R, Figueras J,  
28 529 McKee M, et al., eds. *Health Syst Transit: The European Observatory on Health Systems and*  
29 530 *Policies*, 2010:1-295.  
30 531 33. Gaal P, Szigeti S, Csere M, et al. Hungary: Health system review. In: Busse R, Figueras J, McKee M, et  
31 532 al., eds. *Health Syst Transit*, 2011:1-266.  
32 533 34. Net migration rate: IndexMundi; 2014 [Available from: <http://www.indexmundi.com/g/r.aspx?v=27>  
33 534 accessed 14th July 2016].  
34 535 35. Health Workforce Migration: Migration of doctors 2017 [cited 2017 13th December]. Available from:  
35 536 <http://stats.oecd.org/Index.aspx?QueryId=68336#> accessed 13th December 2017.  
36 537 36. Estatísticas por País de Formacao 2016 2016 [Available from: [http://ordemosmedicos.pt/wp-](http://ordemosmedicos.pt/wp-content/uploads/2017/09/Estatisticas_por_Pa%C3%ADs_de_Formacao_2016.pdf)  
37 538 [content/uploads/2017/09/Estatisticas\\_por\\_Pa%C3%ADs\\_de\\_Formacao\\_2016.pdf](http://ordemosmedicos.pt/wp-content/uploads/2017/09/Estatisticas_por_Pa%C3%ADs_de_Formacao_2016.pdf) accessed 13th  
38 539 December 2017].  
39 540 37. European Commission. Study concerning the review and mapping of continuous professional  
40 541 development and lifelong learning for health professionals in the EU In: 2008-2013 EHP, ed.:  
41 542 European Commission, 2015.  
42 543 38. Grimshaw JM, Shirran L, Thomas R, et al. Changing provider behavior: an overview of systematic  
43 544 reviews of interventions. *Medical care* 2001;39(8 Suppl 2):Ii2-45. [published Online First:  
44 545 2001/10/05]  
45 546 39. Iglehart JK, Baron RB. Ensuring Physicians' Competence — Is Maintenance of Certification the Answer?  
46 547 *N Engl J Med* 2012;367(26):2543-49. doi: 10.1056/NEJMhpr1211043  
47 548 40. Van Der Wees PJ, Nijhuis-Van Der Sanden MWG, Ayanian JZ, et al. Integrating the Use of Patient-  
48 549 Reported Outcomes for Both Clinical Practice and Performance Measurement: Views of Experts  
49 550 from 3 Countries. *Milbank Q* 2014;92(4):754-75. doi: 10.1111/1468-0009.12091  
50 551 41. Wright C, Richards SH, Hill JJ, et al. Multisource Feedback in Evaluating the Performance of Doctors:  
51 552 The Example of the UK General Medical Council Patient and Colleague Questionnaires. *Acad Med*  
52 553 2012;87(12):1668-78. doi: 10.1097/ACM.0b013e3182724cc0  
53 554 42. Cervero RM, Gaines JK. The impact of CME on physician performance and patient health outcomes: an  
54 555 updated synthesis of systematic reviews. *J Contin Educ Health Prof* 2015;35(2):131-8. doi:  
55 556 10.1002/chp.21290 [published Online First: 2015/06/27]  
56 557 43. Dauphinee WD. An International Review of the Recertification and Revalidation of Physicians. In:  
57 558 McGaghie WC, Suker JR, eds. *International Best Practices for Evaluation in the Health Professions*.

- 1  
2  
3  
4 559 London: Radcliffe Publishing 2013:284-86.
- 5 560 44. Ferguson J, Wakeling J, Bowie P. Factors influencing the effectiveness of multisource feedback in  
6 561 improving the professional practice of medical doctors: a systematic review. *BMC Med Educ*  
7 562 2014;14(1):76. doi: 10.1186/1472-6920-14-76
- 8 563 45. Sargeant JM, Mann KV, van der Vleuten CP, et al. Reflection: a link between receiving and using  
9 564 assessment feedback. *Adv Health Sci Educ Theory Pract* 2009;14(3):399-410. doi: 10.1007/s10459-  
10 565 008-9124-4 [published Online First: 2008/06/06]
- 11 566 46. Driessen EW OK. Mentoring. In: K W, ed. Oxford textbook of medical education. London: Oxford  
12 567 University Press 2013:265-84.
- 13 568 47. Sargeant J, Mann K, van der Vleuten C, et al. "Directed" self-assessment: Practice and feedback within a  
14 569 social context. *J Contin Educ Health Prof* 2008;28(1):47-54. doi: 10.1002/chp.155
- 15 570 48. Davis DA, Mazmanian PE, Fordis M, et al. Accuracy of physician self-assessment compared with  
16 571 observed measures of competence: A systematic review. *JAMA* 2006;296(9):1094-102. doi:  
17 572 10.1001/jama.296.9.1094
- 18 573 49. Violato C, Lockyer J. Self and Peer Assessment of Pediatricians, Psychiatrists and Medicine Specialists:  
19 574 Implications for Self-Directed Learning. *Adv Health Sci Educ Theory Pract* 2006;11(3):235-44. doi:  
20 575 10.1007/s10459-005-5639-0
- 21 576 50. Schuwirth LW, Southgate L, Page GG, et al. When enough is enough: a conceptual basis for fair and  
22 577 defensible practice performance assessment. *Med Educ* 2002;36(10):925-30. [published Online First:  
23 578 2002/10/23]
- 24 579 51. Davis D, O'Brien MA, Freemantle N, et al. Impact of formal continuing medical education: do  
25 580 conferences, workshops, rounds, and other traditional continuing education activities change  
26 581 physician behavior or health care outcomes? *JAMA* 1999;282(9):867-74. doi:  
27 582 10.1001/jama.282.9.867 [published Online First: 1999/09/09]
- 28 583 52. Khan KS, Coomarasamy A. A hierarchy of effective teaching and learning to acquire competence in  
29 584 evidenced-based medicine. *BMC Med Educ* 2006;6:59-59. doi: 10.1186/1472-6920-6-59
- 30 585 53. Grant J. The good CPD guide. A practical guide to managed continuing professional development in  
31 586 medicine. 2nd ed. London: New York Radcliffe Publishing 2011.
- 32 587 54. Moore DE, Jr., Green JS, Gallis HA. Achieving desired results and improved outcomes: integrating  
33 588 planning and assessment throughout learning activities. *J Contin Educ Health Prof* 2009;29(1):1-15.  
34 589 doi: 10.1002/chp.20001 [published Online First: 2009/03/17]
- 35 590 55. Davis D, Galbraith R. Continuing medical education effect on practice performance: effectiveness of  
36 591 continuing medical education: American College of Chest Physicians Evidence-Based Educational  
37 592 Guidelines. *Chest* 2009;135(3 Suppl):42s-48s. doi: 10.1378/chest.08-2517 [published Online First:  
38 593 2009/03/20]
- 39 594 56. Forsetlund L, Bjorndal A, Rashidian A, et al. Continuing education meetings and workshops: effects on  
40 595 professional practice and health care outcomes. *Cochrane Database Syst Rev* 2009(2):Cd003030.  
41 596 doi: 10.1002/14651858.CD003030.pub2 [published Online First: 2009/04/17]
- 42 597 57. Newble D, Paget N, McLaren B. Revalidation in Australia and New Zealand: approach of Royal  
43 598 Australasian College of Physicians. *BMJ* 1999;319(7218):1185-88.
- 44 599 58. Drazen JM, Weinstein DF. Considering Recertification. *New Engl J Med* 2010;362(10):946-47. doi:  
45 600 10.1056/NEJMe1000174
- 46 601 59. Cook DA, Blachman MJ, West CP, et al. Physician Attitudes About Maintenance of Certification. *Mayo*  
47 602 *Clin Proc* 2016;91(10):1336-45. doi: 10.1016/j.mayocp.2016.07.004
- 48 603 60. Irvine D. Patients, professionalism, and revalidation. *BMJ* 2005;330(7502):1265-68. doi:  
49 604 10.1136/bmj.330.7502.1265  
50  
51  
52  
53  
54  
55  
56  
57  
58  
59  
60

## COREQ (CONsolidated criteria for REporting Qualitative research) Checklist

A checklist of items that should be included in reports of qualitative research. You must report the page number in your manuscript where you consider each of the items listed in this checklist. If you have not included this information, either revise your manuscript accordingly before submitting or note N/A.

| Topic                                          | Item No. | Guide Questions/Description                                                                                                                              | Reported on Page No. |
|------------------------------------------------|----------|----------------------------------------------------------------------------------------------------------------------------------------------------------|----------------------|
| <b>Domain 1: Research team and reflexivity</b> |          |                                                                                                                                                          |                      |
| <i>Personal characteristics</i>                |          |                                                                                                                                                          |                      |
| Interviewer/facilitator                        | 1        | Which author/s conducted the interview or focus group?                                                                                                   |                      |
| Credentials                                    | 2        | What were the researcher's credentials? E.g. PhD, MD                                                                                                     |                      |
| Occupation                                     | 3        | What was their occupation at the time of the study?                                                                                                      |                      |
| Gender                                         | 4        | Was the researcher male or female?                                                                                                                       |                      |
| Experience and training                        | 5        | What experience or training did the researcher have?                                                                                                     |                      |
| <i>Relationship with participants</i>          |          |                                                                                                                                                          |                      |
| Relationship established                       | 6        | Was a relationship established prior to study commencement?                                                                                              |                      |
| Participant knowledge of the interviewer       | 7        | What did the participants know about the researcher? e.g. personal goals, reasons for doing the research                                                 |                      |
| Interviewer characteristics                    | 8        | What characteristics were reported about the interviewer/facilitator? e.g. Bias, assumptions, reasons and interests in the research topic                |                      |
| <b>Domain 2: Study design</b>                  |          |                                                                                                                                                          |                      |
| <i>Theoretical framework</i>                   |          |                                                                                                                                                          |                      |
| Methodological orientation and Theory          | 9        | What methodological orientation was stated to underpin the study? e.g. grounded theory, discourse analysis, ethnography, phenomenology, content analysis |                      |
| <i>Participant selection</i>                   |          |                                                                                                                                                          |                      |
| Sampling                                       | 10       | How were participants selected? e.g. purposive, convenience, consecutive, snowball                                                                       |                      |
| Method of approach                             | 11       | How were participants approached? e.g. face-to-face, telephone, mail, email                                                                              |                      |
| Sample size                                    | 12       | How many participants were in the study?                                                                                                                 |                      |
| Non-participation                              | 13       | How many people refused to participate or dropped out? Reasons?                                                                                          |                      |
| <i>Setting</i>                                 |          |                                                                                                                                                          |                      |
| Setting of data collection                     | 14       | Where was the data collected? e.g. home, clinic, workplace                                                                                               |                      |
| Presence of non-participants                   | 15       | Was anyone else present besides the participants and researchers?                                                                                        |                      |
| Description of sample                          | 16       | What are the important characteristics of the sample? e.g. demographic data, date                                                                        |                      |
| <i>Data collection</i>                         |          |                                                                                                                                                          |                      |
| Interview guide                                | 17       | Were questions, prompts, guides provided by the authors? Was it pilot tested?                                                                            |                      |
| Repeat interviews                              | 18       | Were repeat interviews carried out? If yes, how many?                                                                                                    |                      |
| Audio/visual recording                         | 19       | Did the research use audio or visual recording to collect the data?                                                                                      |                      |
| Field notes                                    | 20       | Were field notes made during and/or after the interview or focus group?                                                                                  |                      |
| Duration                                       | 21       | What was the duration of the interviews or focus group?                                                                                                  |                      |
| Data saturation                                | 22       | Was data saturation discussed?                                                                                                                           |                      |
| Transcripts returned                           | 23       | Were transcripts returned to participants for comment and/or                                                                                             |                      |

| Topic                                  | Item No. | Guide Questions/Description                                                                                                        | Reported on Page No. |
|----------------------------------------|----------|------------------------------------------------------------------------------------------------------------------------------------|----------------------|
|                                        |          | correction?                                                                                                                        |                      |
| <b>Domain 3: analysis and findings</b> |          |                                                                                                                                    |                      |
| <i>Data analysis</i>                   |          |                                                                                                                                    |                      |
| Number of data coders                  | 24       | How many data coders coded the data?                                                                                               |                      |
| Description of the coding tree         | 25       | Did authors provide a description of the coding tree?                                                                              |                      |
| Derivation of themes                   | 26       | Were themes identified in advance or derived from the data?                                                                        |                      |
| Software                               | 27       | What software, if applicable, was used to manage the data?                                                                         |                      |
| Participant checking                   | 28       | Did participants provide feedback on the findings?                                                                                 |                      |
| <i>Reporting</i>                       |          |                                                                                                                                    |                      |
| Quotations presented                   | 29       | Were participant quotations presented to illustrate the themes/findings?<br>Was each quotation identified? e.g. participant number |                      |
| Data and findings consistent           | 30       | Was there consistency between the data presented and the findings?                                                                 |                      |
| Clarity of major themes                | 31       | Were major themes clearly presented in the findings?                                                                               |                      |
| Clarity of minor themes                | 32       | Is there a description of diverse cases or discussion of minor themes?                                                             |                      |

Developed from: Tong A, Sainsbury P, Craig J. Consolidated criteria for reporting qualitative research (COREQ): a 32-item checklist for interviews and focus groups. *International Journal for Quality in Health Care*. 2007. Volume 19, Number 6: pp. 349 – 357

**Once you have completed this checklist, please save a copy and upload it as part of your submission. DO NOT include this checklist as part of the main manuscript document. It must be uploaded as a separate file.**



# BMJ Open

## Doctors on the move: a European case study on the key characteristics of national recertification systems

|                                 |                                                                                                                                                                                                                                                                                                                                                                                                                                                                                                                                                                                                                          |
|---------------------------------|--------------------------------------------------------------------------------------------------------------------------------------------------------------------------------------------------------------------------------------------------------------------------------------------------------------------------------------------------------------------------------------------------------------------------------------------------------------------------------------------------------------------------------------------------------------------------------------------------------------------------|
| Journal:                        | <i>BMJ Open</i>                                                                                                                                                                                                                                                                                                                                                                                                                                                                                                                                                                                                          |
| Manuscript ID                   | bmjopen-2017-019963.R2                                                                                                                                                                                                                                                                                                                                                                                                                                                                                                                                                                                                   |
| Article Type:                   | Research                                                                                                                                                                                                                                                                                                                                                                                                                                                                                                                                                                                                                 |
| Date Submitted by the Author:   | 09-Mar-2018                                                                                                                                                                                                                                                                                                                                                                                                                                                                                                                                                                                                              |
| Complete List of Authors:       | Sehlbach, Carolin; Maastricht University - Location Randwyck, Department of Educational Research and Development<br>Govaerts, MJ; Maastricht University, Department of Educational Research and Development<br>Mitchell, Sharon; European Respiratory Society<br>Rohde, Gernot; Johann Wolfgang Goethe University Hospital, Respiratory Medicine<br>Smeenck, Frank; Department of Respiratory Medicine, Catharina Hospital; Maastricht University - Location Randwyck, Department of Educational Research and Development<br>Driessen, Erik ; Maastricht University , Department of Educational Research and Development |
| <b>Primary Subject Heading</b>: | Medical education and training                                                                                                                                                                                                                                                                                                                                                                                                                                                                                                                                                                                           |
| Secondary Subject Heading:      | Medical education and training                                                                                                                                                                                                                                                                                                                                                                                                                                                                                                                                                                                           |
| Keywords:                       | Recertification, Continuing Professional Development, Performance assessment, Patient safety, Quality assurance, Professional mobility                                                                                                                                                                                                                                                                                                                                                                                                                                                                                   |
|                                 |                                                                                                                                                                                                                                                                                                                                                                                                                                                                                                                                                                                                                          |

SCHOLARONE™  
Manuscripts

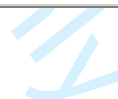

1 **Doctors on the move: a European case study on the key characteristics of national**  
2 **recertification systems**

3 C Sehlbach, MJB Govaerts, S Mitchell, GGU Rohde, FWJM Smeenk, EW Driessen

- 4 - Carolin Sehlbach, PhD student, Maastricht University, Faculty of Health, Medicine  
5 and Life Sciences, Educational Development and Research, 6229 ER Maastricht, The  
6 Netherlands
- 7 - Marjan J B Govaerts, Associate professor, Maastricht University, Faculty of Health,  
8 Medicine and Life Sciences, Educational Development and Research, 6229 ER  
9 Maastricht, The Netherlands
- 10 - Sharon Mitchell, Educational Standards Manager, European Respiratory Society,  
11 Department of Education, 1003 Lausanne, Switzerland
- 12 - Gernot G U Rohde, Professor, Johann Wolfgang Goethe University Hospital,  
13 Respiratory Medicine, 60590 Frankfurt am Main, Germany
- 14 - Frank W J M Smeenk, Professor, Catharina Hospital, Respiratory Medicine, 5623 EJ  
15 Eindhoven, The Netherlands
- 16 - Erik W Driessen; Professor, Maastricht University, Faculty of Health, Medicine and  
17 Life Sciences, Educational Development and Research, 6229 ER Maastricht, The  
18 Netherlands

19  
20 **Corresponding author:** Carolin Sehlbach, MSc, PhD Student, Maastricht University,  
21 Faculty of Health, Medicine and Life Sciences, Educational Development and Research,  
22 Universiteitssingel 60, 6229 ER Maastricht, The Netherlands  
23 ([carolin.sehlbach@maastrichtuniversity.nl](mailto:carolin.sehlbach@maastrichtuniversity.nl))  
24 T +31 433881628

25  
26 Word count: 3,322 words

27 Details on funding: Carolin Sehlbach is a PhD student at Maastricht University, on a project



1  
2  
3  
4  
5 28 funded by the European Respiratory Society.  
6

7 29 Copyright: The Corresponding Author has the right to grant on behalf of all authors and does  
8

9 30 grant on behalf of all authors, an exclusive licence on a worldwide basis to the BMJ  
10

11 31 Publishing Group Ltd to permit this article (if accepted) to be published in BMJ editions and  
12

13 32 any other BMJ PGL products and sublicenses such use and exploit all subsidiary rights, as set  
14

15 33 out in our licence.  
16  
17  
18  
19  
20  
21  
22  
23  
24  
25  
26  
27  
28  
29  
30  
31  
32  
33  
34  
35  
36  
37  
38  
39  
40  
41  
42  
43  
44  
45  
46  
47  
48  
49  
50  
51  
52  
53  
54  
55  
56  
57  
58  
59  
60

1  
2  
3  
4  
5 34 **Doctors on the move: a European case study on the key characteristics of national**  
6  
7 35 **recertification systems**  
8  
9

10 36 **ABSTRACT**  
11

12 37 **Objectives:** With increased cross-border movement, ensuring safe and high-quality healthcare  
13  
14 38 has gained primacy. The purpose of recertification is to ensure quality of care through  
15  
16 39 periodically attesting doctors' professional proficiency in their field. Professional migration  
17  
18 40 and facilitated cross-border recognition of qualifications, however, make us question the  
19  
20 41 fitness of national policies for safeguarding patient care and the international accountability of  
21  
22 42 doctors.  
23  
24

25 43 **Design and setting:** We performed document analyses and conducted 19 semi-structured  
26  
27 44 interviews to identify and describe key characteristics and effective components of 10  
28  
29 45 different European recertification systems, each representing one case (collective case study).  
30  
31 46 We subsequently compared these systems to explore similarities and differences in terms of  
32  
33 47 assessment criteria used to determine process quality.  
34  
35

36 48 **Results:** Great variety existed between countries in terms and assessment formats used,  
37  
38 49 targeting cognition, competence and performance (Miller's assessment pyramid).  
39  
40 50 Recertification procedures and requirements also varied significantly, ranging from voluntary  
41  
42 51 participation in professional development modules to the mandatory collection of multiple  
43  
44 52 performance data in a competency-based portfolio. Knowledge assessment was fundamental  
45  
46 53 to recertification in most countries. Another difference concerned the stakeholders involved in  
47  
48 54 the recertification process: while some systems exclusively relied on doctors' self-assessment,  
49  
50 55 others involved multiple stakeholders but rarely included patients in assessment of doctors'  
51  
52 56 professional competence. Differences between systems partly reflected different goals and  
53  
54 57 primary purposes of recertification.  
55  
56  
57

1  
2  
3  
4  
5 58 **Conclusion:** Recertification systems differ substantially internationally with regard to the  
6  
7 59 criteria they apply to assess doctors' competence, their aims, requirements, assessment  
8  
9 60 formats, and patient involvement. In the light of professional mobility and associated  
10  
11 61 demands for accountability, we recommend that competence assessment include patients'  
12  
13 62 perspectives, and recertification practices be shared internationally to enhance transparency.  
14  
15 63 This can help facilitate cross-border movement, while guaranteeing high-quality patient care.  
16  
17  
18  
19

20 65 Word count: 277  
21  
22  
23

24 67 **Key words:** Recertification; Continuing Professional Development; Performance assessment;  
25  
26 68 Patient safety; Quality assurance; Professional mobility  
27  
28  
29

### 30 31 70 **Strengths and limitations of this study**

- 32  
33 71 • Our research provides a comprehensive comparison of ten European recertification  
34  
35 72 systems and their assessment criteria used to ensure quality of care delivered. It  
36  
37 73 highlights how physicians' knowledge and competence are assessed, which stakeholders  
38  
39 74 are involved and how the processes are regulated.  
40  
41  
42 75 • Our research focuses on European countries only as free cross-border movement of  
43  
44 76 professionals is unique to the European context.  
45  
46 77 • We cannot exclude that interregional variations were missed because recertification  
47  
48 78 systems were decentralized in some countries and we explored the national level only.  
49  
50  
51 79 • The diversity and ambiguity in terminology (recertification, revalidation, continuing  
52  
53 80 professional development) underline the challenge of comparing various recertification  
54  
55 81 systems.  
56  
57  
58  
59  
60

1  
2  
3  
4  
5 82 **Doctors on the move: a European case study on the key characteristics of national**  
6  
7 83 **recertification systems**  
8  
9

10 84 **INTRODUCTION**  
11

12 85 Increased mobility of health professionals can pose potential threats to the quality of care.  
13  
14 86 Suppose, for instance, a high performing, Romanian doctor moves to the Netherlands. There,  
15  
16 87 this person will face a new work environment in a distinct healthcare system with specific  
17  
18 88 quality guidelines, and different morbidity patterns, and patient demands. As this new work  
19  
20 89 setting requires specific knowledge, skills, and values that differ from the Romanian context  
21  
22 90 and culture, you may wonder: Will this doctor still be competent to deliver high-quality care?  
23  
24

25 91 While the problem of safeguarding quality of care across borders is omnipresent, it is  
26  
27 92 particularly pertinent in Europe where the free movement of professionals has long historical  
28  
29 93 and legal roots. Although a European Commission directive has facilitated mobility by  
30  
31 94 providing for international recognition of professional qualifications, it fails to guarantee that  
32  
33 95 doctors actually meet the minimum and context-specific quality standards. To safeguard  
34  
35 96 quality of patient care, regulatory bodies around the world have implemented different  
36  
37 97 systems,<sup>1 2</sup> such as recertification systems. Recertification entails lifelong learning and  
38  
39 98 periodic assessment of doctors' competence and performance through various methods.<sup>3</sup> It  
40  
41 99 describes the process designed to promote and demonstrate continuous professional  
42  
43 100 competence.<sup>4</sup> More specifically, it requires a formal procedure of assessing and attesting  
44  
45 101 quality of service provided "in accordance with established requirements or standards."<sup>5</sup> By  
46  
47 102 renewing initial certification, *recertification* aims to address any decline in performance as  
48  
49 103 well as ensure trained doctors' adaptation to advances in knowledge and technology.<sup>6 7</sup> This is  
50  
51 104 particularly important in times of increased publicity over individual failures of medical  
52  
53 105 performance, demands for doctors' accountability, and concerns about patient safety.<sup>8</sup>  
54  
55  
56  
57  
58  
59  
60

1  
2  
3  
4  
5 106 Despite its well-intended aim, recertification harbours two inherent problems. First,  
6  
7 107 current national recertification practices fail to ensure quality of care internationally, as they  
8  
9 108 assess doctors' competence and performance in accordance with *national* quality standards.  
10  
11 109 Differences in standards across countries and the absence of international recertification  
12  
13 110 systems may complicate international quality assurance and quality improvement.<sup>7</sup> This begs  
14  
15 111 the question of whether such discrete practices can respond to repeated calls for international  
16  
17 112 accountability and transparency.<sup>4</sup> Second, although research on assessment of professional  
18  
19 113 competence provided a set of guidelines for assessment criteria to ensure high quality  
20  
21 114 assessment,<sup>9</sup> the question on how to assess doctors' competence has often turned into a  
22  
23 115 political rather than an educational one,<sup>10</sup> potentially impacting on effectiveness of  
24  
25 116 recertification systems.

26  
27  
28  
29 117 "Competence" is defined as the ability to integrate knowledge, skills, and attitudes into  
30  
31 118 a certain context to ensure safe patient care.<sup>11 12</sup> This definition suggests to pay balanced  
32  
33 119 attention to multiple competency domains relevant to a doctor, when assessing professional  
34  
35 120 competence.<sup>13</sup> Indeed, many scholars and institutions advocate the assessment of not only  
36  
37 121 medical knowledge and skills, but also competencies, such as communication, collaboration,  
38  
39 122 and clinical judgment, as well as cultural competence or critical consciousness.<sup>14-16</sup>  
40  
41 123 Assessment measures must also be robust and focus on the healthcare system's needs and  
42  
43 124 outcomes, implying involvement of key stakeholders, particularly patients when evaluating  
44  
45 125 quality of care.<sup>17-20</sup> It is furthermore acknowledged that, for each of the competencies,  
46  
47 126 outcomes of different assessment methods must be combined to ensure robust decision  
48  
49 127 making about professional competence<sup>21 22</sup>  
50  
51 128 To conclude, cross-border quality of care will be promoted if countries not only share their  
52  
53 129 recertification practices, but also are willing to critically reflect on quality of assessment  
54  
55  
56  
57  
58  
59  
60

1  
2  
3  
4  
5 130 processes embedded in recertification procedures.<sup>8 23</sup> In the present study, we attempt taking a  
6  
7 131 first step in this direction by identifying different national recertification approaches. The  
8  
9 132 question of the present study, therefore, was what are the key characteristics of recertification  
10  
11 133 systems for doctors of different countries? More specifically, we aimed at exploring use of  
12  
13 134 assessment criteria in design of recertification procedures. We used a collective case study  
14  
15 135 design to describe and compare different national systems. We were particularly interested in  
16  
17 136 the assessment criteria used, if any, and how they were applied. Although recertification is  
18  
19 137 sometimes also coined “revalidation,” “re-accreditation,” and “maintenance of certification”  
20  
21 138 or used interchangeably with “continuing professional development” in other contexts, this  
22  
23 139 article keeps to the former term. The article builds on previous work on certification but  
24  
25 140 primarily focuses on recertification.  
26  
27  
28

## 141 **METHODS**

### 142 **Study Design and Case Selection**

143 We described and analysed the recertification systems of ten individual European countries.  
144 Each country’s national recertification system represented a single case. We selected our  
145 cases using purposeful sampling to reach maximum heterogeneity in terms of geographical  
146 spread across Europe, demographics, health professionals’ migration profile, and type of  
147 healthcare system (Table 1).<sup>24</sup>  
148

149 **Table 1. Sampling criteria**

| 147 Sampling criterion  | 148 Specification of criterion                                                                                                                                                                                                                                       |
|-------------------------|----------------------------------------------------------------------------------------------------------------------------------------------------------------------------------------------------------------------------------------------------------------------|
| 149 Geographical spread | 150 Include countries of different sizes, demographic make-up,<br>151 with different cultures, and from a range of geographical<br>152 locations (Northern, Eastern, Southern, Western, and Central<br>153 Europe).<br>154<br>155<br>156<br>157<br>158<br>159<br>160 |

|                                                             |                                |                                                                                                                                                                                                                                                             |
|-------------------------------------------------------------|--------------------------------|-------------------------------------------------------------------------------------------------------------------------------------------------------------------------------------------------------------------------------------------------------------|
| 1<br>2<br>3<br>4<br>5<br>6<br>7<br>8<br>9<br>10<br>11<br>12 | Migration profile and position | Include countries that have different levels of health professional migration (inflow and outflow) and rely more or less on foreign doctors; include both “junior” (EU12) and “senior” EU member states (EU15) as indicated by the length of EU membership. |
| 13<br>14<br>15<br>16<br>17                                  | Different healthcare systems   | Include countries with different structures of healthcare services in terms of how they are financed and covered by the insurance system (publicly, privately, or both).                                                                                    |

18  
19

151 EU2 = countries which joined the EU in 2007: Bulgaria and Romania.

152 EU10 = countries which joined the EU in 2004: Cyprus, Czech Republic, Estonia, Hungary,  
153 Latvia, Lithuania, Poland, Slovakia, and Slovenia.154 EU12 = EU2 and EU10 countries: Cyprus, Czech Republic, Bulgaria, Estonia, Hungary,  
155 Latvia, Lithuania, Poland, Romania, Slovakia, and Slovenia.156 EU15 = countries which were already EU member states in 2003: Austria, Belgium,  
157 Denmark, Finland, France, Germany, Greece, Ireland, Italy, Luxembourg, the Netherlands,  
158 Portugal, Spain, Sweden, and the UK.

159

160 Based on these criteria, the final study sample included Denmark, Germany, Hungary,  
161 Ireland, Poland, Portugal, Spain, Switzerland<sup>1</sup>, the Netherlands, and the United Kingdom

162 (Table 2).

---

<sup>1</sup> Although Switzerland is not a member of the European Union, it is part of the European Economic Area and characterised by a high migration rate, and high reliance on foreign trained doctors, which makes it relevant for our study.

163 **Table 2.** *Overview of selected countries and their health insurance systems, their coverage, and the existence of a gatekeeper system*<sup>25-33</sup>

| Country        | Geographic location | Net migration rate (migrants/1,000 inhabitants) <sup>34</sup> | % of foreign-trained doctors, latest available year <sup>24 35 36</sup> | Type of health insurance system                                                                   | Financing of healthcare                                                                    |
|----------------|---------------------|---------------------------------------------------------------|-------------------------------------------------------------------------|---------------------------------------------------------------------------------------------------|--------------------------------------------------------------------------------------------|
| <b>Denmark</b> | North               | 2.25                                                          | 5.27%                                                                   | Decentralized, offers universal and nearly free access                                            | Taxation                                                                                   |
| <b>Germany</b> | Central             | 1.06                                                          | 10.26%                                                                  | Mix of compulsory public and voluntary private health insurance; highly decentralized             | Statutory insurance, taxation, out-of-pocket payments, and private health insurance        |
| <b>Hungary</b> | East                | 1.34                                                          | 7.79%                                                                   | National Health Insurance Fund is state-owned and offers complete coverage, partly free of charge | Taxation and social health insurance contributions                                         |
| <b>Ireland</b> | West                | 3.31                                                          | 41.6%                                                                   | National Healthcare System, Mix of public and voluntary private health insurance                  | Taxation and supported by co-payments for specialist's treatment from insurance providers. |
| <b>Poland</b>  | East                | -0.47                                                         | 1.8%                                                                    | Decentralized, mandatory health insurance system                                                  | National Health Funds                                                                      |



|                        |         |      |        |                                                                                                                       |                                                                               |
|------------------------|---------|------|--------|-----------------------------------------------------------------------------------------------------------------------|-------------------------------------------------------------------------------|
| <b>Portugal</b>        | South   | 2.74 | 7.74%  | National Health Service<br>Private and public insurance<br>schemes plus voluntary private<br>insurances               | Taxation, public and private<br>insurance schemes, and direct<br>payment      |
| <b>Spain</b>           | South   | 7.24 | 9.4%   | National Health Service<br>Private and public insurance<br>schemes                                                    | Taxation and payroll<br>contributions                                         |
| <b>Switzerland</b>     | Central | 5.43 | 27.05% | Obligatory, statutory,<br>decentralized insurance system<br>Federal Office for Social<br>Insurance monitors providers | Compulsory health insurance<br>premiums and out-of-pocket<br>payments         |
| <b>The Netherlands</b> | Central | 1.97 | 2.13%  | Mixed model of compulsory<br>social and voluntary private<br>insurance                                                | Health Insurance, taxation and<br>direct payments                             |
| <b>United Kingdom</b>  | West    | 2.56 | 28.07% | Mix of public and voluntary<br>private health insurance                                                               | National Health Service,<br>taxation, and national<br>insurance contributions |

1  
2  
3 165 **Data collection**  
4

5 166 We collected data on the respective recertification procedures by performing a document  
6  
7 167 analysis for each case in addition to conducting semi-structured interviews with two or three  
8  
9 168 representatives from each country.  
10

11 169 For the document analyses, we retrieved documents describing national recertification  
12  
13 170 procedures for doctors from the websites of national certification organizations, and translated  
14  
15 171 them into English if needed. The documents included national recertification schemes and  
16  
17 172 regulations, rules and reports of medical education and training, user guidelines, laws and  
18  
19 173 grey literature articles. We focused on documents that clarified rationale, form and procedure,  
20  
21 174 as well as requirements and rewards of each recertification program.  
22  
23

24 175 To validate and corroborate our interpretation of data from document analysis, we  
25  
26 176 conducted one to three semi-structured interviews with representatives of each national  
27  
28 177 regulatory body responsible for postgraduate medical education and recertification or the  
29  
30 178 recognition of professional qualifications (e.g., international affairs offices) (N=19). These  
31  
32 179 interviewees were directors of professional development and practice, heads of recertification  
33  
34 180 departments, experts on continuing professional development, and official secretaries or legal  
35  
36 181 advisors to national medical education offices, medical or scientific societies, accreditation  
37  
38 182 bodies, medical royal colleges, councils, or chambers (Table 3).  
39  
40  
41  
42  
43

44 184 **Table 3.** *Number and profile of respondents per country*  
45

| Country investigated | Number of interviews |
|----------------------|----------------------|
| Netherlands          | 1                    |
| Switzerland          | 2                    |
| Germany              | 3                    |
| United Kingdom       | 2                    |
| Ireland              | 2                    |
| Denmark              | 2                    |
| Hungary              | 1                    |

---

|                 |   |
|-----------------|---|
| <b>Poland</b>   | 2 |
| <b>Portugal</b> | 2 |
| <b>Spain</b>    | 2 |

---

185

186 The first author (CS) conducted all interviews via video or phone, based on an interview  
187 protocol adapted from a study on continuing professional development and lifelong learning  
188 for health professionals.<sup>37</sup> The interview protocol was piloted in the Netherlands. Questions  
189 addressed competency frameworks as well as rules and regulations of recertification, asking  
190 about regulatory authorities involved, main objective(s), structure, requirements, and  
191 consequences of compliance or non-compliance. Before the interview, we explained the  
192 research purposes to participants and asked them to give informed consent. Interviews were  
193 audio-taped and lasted 50-90 minutes, during which notes were taken. Notes were  
194 subsequently presented to interviewees to approve or to add information.

195 Data collection took place from April to September, 2016.

### 196 **Patient involvement**

197 No patients were involved in this research, given our specific aim.

### 198 **Data analysis**

199 Data analysis spanned a two-step process. First, we analysed the data from the document  
200 analyses and interviews to identify and describe key characteristics of each case. We asked at  
201 least one interviewee per country to comment on the accuracy and completeness of the  
202 described recertification system. We subsequently re-analysed the data, specifically focusing  
203 on the application of criteria for high quality assessment: validity, reliability, educational and  
204 catalytic effect.<sup>9 14 38</sup> For that purpose we identified specific strategies used to ensure  
205 assessment quality in terms of validity, reliability and educational consequences, for each of  
206 the re-certification system (Box 1).

207

208 **Box 1.** *Strategies embedded in recertification, affecting assessment quality*

| Criterion                   |                                         | Features                                                                                                                                                                                                                                                                                                                                                                                                                                          |
|-----------------------------|-----------------------------------------|---------------------------------------------------------------------------------------------------------------------------------------------------------------------------------------------------------------------------------------------------------------------------------------------------------------------------------------------------------------------------------------------------------------------------------------------------|
| <b>What is assessed?</b>    | Program of assessment                   | <ul style="list-style-type: none"> <li>• Inclusion of competency domain(s) or domain(s) of professional practice (including lifelong learning)</li> <li>• Use of overarching framework (based on needs healthcare system; key domains professional practice)</li> <li>• Assessment and learning aligned with individual needs</li> <li>• Focus on process of care</li> <li>• Focus on patient outcome (including patient satisfaction)</li> </ul> |
| <b>When is it assessed?</b> | Frequency of recertification cycle      | <ul style="list-style-type: none"> <li>• Yearly</li> <li>• Every 2-3 years</li> <li>• Every 4-5 years</li> <li>• Every &gt; 5 years</li> <li>• No time frame</li> </ul>                                                                                                                                                                                                                                                                           |
| <b>Who assesses?</b>        | Stakeholders involved in the assessment | <ul style="list-style-type: none"> <li>• Individual (self-assessment)</li> <li>• Peers</li> <li>• Employer</li> <li>• Patients</li> <li>• Others</li> </ul>                                                                                                                                                                                                                                                                                       |
| <b>How is it assessed?</b>  | Assessment methods                      | <ul style="list-style-type: none"> <li>• Competence level according to Miller's assessment pyramid (cognition versus performance)</li> <li>• Self-assessment</li> <li>• Portfolios</li> <li>• Credit collection through course participation</li> <li>• Examinations (standardised)</li> <li>• Simulations</li> <li>• Clinical audits</li> <li>• Multi-source feedback</li> </ul>                                                                 |
|                             | Regulations                             | <ul style="list-style-type: none"> <li>• Voluntary vs. mandatory</li> <li>• Legal vs. professional obligation</li> </ul>                                                                                                                                                                                                                                                                                                                          |
| <b>What are the</b>         | Assessment goal                         | <ul style="list-style-type: none"> <li>• Quality of care and patient safety</li> <li>• Professional development</li> </ul>                                                                                                                                                                                                                                                                                                                        |

|                    |                                                                                                                 |
|--------------------|-----------------------------------------------------------------------------------------------------------------|
| <b>objectives?</b> | <ul style="list-style-type: none"><li>• Maintenance of doctors' knowledge and skills</li></ul>                  |
| Consequence        | <ul style="list-style-type: none"><li>• Loss of license</li></ul>                                               |
| s of non-          | <ul style="list-style-type: none"><li>• Financial sanctions</li></ul>                                           |
| compliance         | <ul style="list-style-type: none"><li>• Follow-up</li><li>• Work under supervision</li><li>• Feedback</li></ul> |

209

210 These strategies included program of assessment, assessment goals and methods (i.e.,  
211 authentic and suitable methods which aim at measuring day-to-day performance and  
212 professional competence), as well as frequency of assessment (i.e., consistent outcomes across  
213 measurements and decisions). We also addressed the involvement of different stakeholders  
214 including patients, and consequences for learning and development. Self-assessment as tool  
215 for lifelong learning and assessment of practice performance were the two major components  
216 of recertification considered.<sup>39</sup> Finally, we compared recertification systems across cases to  
217 identify similarities and differences with respect to use of the aforementioned assessment  
218 criteria.

## 219 RESULTS

220 In the following paragraphs, we highlight differences and/or similarities across countries in  
221 terms of the purpose, focus, frequency, and methods of recertification, and the stakeholders  
222 involved in the process. Exact details are provided in Table 4, while Table 5 outlines the  
223 bodies (Medical specialties, Ministries of Health or Medical Authorities) responsible for  
224 recertification. The final paragraph provides a synopsis of the most striking results.

225 All systems uncovered applied to all registered practicing doctors, irrelevant of whether they  
226 were trained nationally or internationally, as they are automatically enrolled in the national  
227 scheme upon registration.

228

1  
2  
3 229 **1. Purpose of recertification**  
4

5 230 As shown in Table 4, the purpose of recertification constituted a major source of variance.  
6

7 231 While several countries aimed to improve quality of care and patient safety, a minority (N=2),  
8

9 232 essentially those countries where recertification was not mandatory, upheld personal  
10

11 233 development and career advancement as their primary objective (Table 4).  
12  
13  
14  
15  
16  
17  
18  
19  
20  
21  
22  
23  
24  
25  
26  
27  
28  
29  
30  
31  
32  
33  
34  
35  
36  
37  
38  
39  
40  
41  
42  
43  
44  
45  
46  
47  
48  
49  
50  
51  
52  
53  
54  
55  
56  
57  
58  
59  
60

234 **Table 4.** *Competence assessment in recertification systems of investigated cases*

| Case           | Purpose <sup>1</sup> | Focus <sup>2</sup> |    |                    | Based on competency framework | Frequency         |                   | Assessment methods <sup>3</sup> | Who decides on activities to be followed? |           | Stakeholders involved in the assessment |            |          |           | How is internal quality of assessment assured?           |
|----------------|----------------------|--------------------|----|--------------------|-------------------------------|-------------------|-------------------|---------------------------------|-------------------------------------------|-----------|-----------------------------------------|------------|----------|-----------|----------------------------------------------------------|
|                |                      | LLL                | PP | Mandatory (yes/no) |                               | After ... credits | Every ... year(s) |                                 | Individual doctor                         | Employers | Doctor him/herself                      | Colleagues | Patients | Employers |                                                          |
| Netherlands    | 1, 3                 | +                  | +  | +                  | +                             | 200               | 5                 | 1.4-1.7; 2; 3; 4; 5             | +                                         | -         | +                                       | +          | +        | +         | quality visitations, assessment of group functioning     |
| Switzerland    | 1, 2                 | +                  | +  | +                  | N/A                           | 150               | 3                 | 1.1-1.7; 2; 3                   | +                                         | -         | +                                       | +          | -        | -         | N/A                                                      |
| Germany        | 1, 3                 | +                  | -  | +                  | N/A                           | 250               | 5                 | 1.1-1.4; 1.6-1.8                | +                                         | -         | +                                       | -          | -        | -         | accreditation of CME providers                           |
| United Kingdom | 1, 2, 3              | +                  | +  | +                  | +                             | ~250              | 5                 | 1.1-1.4; 1.6; 1.7; 2; 3; 4; 7   | +                                         | -         | +                                       | +          | +        | +         | independent assessors, information triangulation, audits |
| Ireland        | 3                    | +                  | +  | +                  | +                             | 50                | 1                 | 1.2-1.6; 2                      | +                                         | -         | +                                       | -          | -        | -         | N/A                                                      |
| Denmark        | 1, 2                 | -                  | +  | -                  | -                             | N/A               | 1                 | 1; 3; 4                         | +                                         | +         | +                                       | -          | -        | +         | local management                                         |
| Hungary        | 2                    | +                  | -  | +                  | N/A                           | 250               | 5                 | 1.1; 1.2; 1.6-1.8; 4; 5; 6      | +                                         | -         | +                                       | -          | -        | -         | more credits for CPD activities with exams               |

1  
2  
3  
4  
5  
6  
7  
8  
9  
10  
11  
12  
13  
14  
15  
16  
17  
18  
19  
20  
21  
22  
23  
24  
25  
26  
27  
28  
29  
30  
31  
32  
33  
34  
35  
36  
37  
38  
39  
40  
41  
42  
43  
44  
45  
46  
47

|                 |   |   |   |   |     |     |   |                      |   |   |   |   |   |     |                                      |
|-----------------|---|---|---|---|-----|-----|---|----------------------|---|---|---|---|---|-----|--------------------------------------|
| <b>Poland</b>   | 3 | + | - | + | N/A | 200 | 4 | 1.1; 1.2;<br>1.4-1.7 | + | - | + | - | - | -   | accreditation<br>of CME<br>providers |
| <b>Portugal</b> | 4 | + | + | - | N/A | N/A | 5 | 4                    | + | - | - | + | - | (+) | N/A                                  |
| <b>Spain</b>    | 4 | + | + | - | +   | N/A | 3 | 1.2;<br>4            | + | - | + | + | - | +   | organization's<br>quality<br>control |

235

- 236 <sup>1</sup>. Recertification purpose: 1. Quality of care; 2. Patient safety; 3. Maintenance of doctors' knowledge and skills; 4. Career.
- 237 <sup>2</sup>. Focus of recertification: LLL = lifelong learning; PP = Practice performance.
- 238 <sup>3</sup>. Assessment methods:
  - 239 1. CPD: [ 1.1 specialty-specific CPD course; 1.2 General CPD course (communication skills); 1.3 Individual learning (reading); 1.4 Conference
  - 240 attendance; 1.5 Teaching; 1.6 Research & scientific publications; 1.7 E-learning; 1.8 Time spent as visiting professional]
  - 241 2. Clinical audit;
  - 242 3. Appraisal/peer reviews;
  - 243 4. Portfolio;
  - 244 5. Minimum hours of patient contact;
  - 245 6. Mandatory intensive course;
  - 246 7. Significant events.
- 247 yes = + , no = -



Participation in a recertification program was voluntary in three countries only, Denmark, Spain and Portugal, though all countries imposed a professional or legal obligation to engage in lifelong learning. Consequences of non-compliance were non-existent in voluntary systems; in the mandatory systems (N=7), however, they varied from financial sanctions (Switzerland and Germany) or work under supervision to suspension of the license to practice (Germany, the UK, Hungary and partly the Netherlands), with two countries allowing for license recovery. Finally, one country conferred a lifelong registration upon doctors, obviating the need to impose any sanctions in practice (Table 5).

**Table 5.** Regulation of recertification process in the countries under scrutiny

| Case                  | Who sets rules for recertification? |                    |                                |                                 | Potential <sup>258</sup> consequences of non-compliance <sup>3</sup> |
|-----------------------|-------------------------------------|--------------------|--------------------------------|---------------------------------|----------------------------------------------------------------------|
|                       | Medical Specialties                 | Ministry of Health | Medical Authority <sup>1</sup> | Type of obligation <sup>2</sup> |                                                                      |
| <b>Netherlands</b>    | yes                                 | yes                | yes                            | 1                               | (1), 2                                                               |
| <b>Switzerland</b>    | yes                                 | no                 | no                             | 1,2                             | 3, 4                                                                 |
| <b>Germany</b>        | no                                  | yes                | yes                            | 1,2                             | 1, 3                                                                 |
| <b>United Kingdom</b> | no                                  | no                 | yes                            | 1,2                             | 1, 2                                                                 |
| <b>Ireland</b>        | yes                                 | no                 | yes                            | 1                               | 4, 5                                                                 |
| <b>Denmark</b>        | /                                   | /                  | yes                            | 2                               | 4                                                                    |
| <b>Hungary</b>        | /                                   | yes                | yes                            | 1                               | 1                                                                    |
| <b>Poland</b>         | /                                   | yes                | yes                            | 1                               | 4                                                                    |
| <b>Portugal</b>       | /                                   | /                  | /                              | /                               | 4                                                                    |
| <b>Spain</b>          | yes                                 | /                  | yes                            | 1                               | 4                                                                    |

<sup>1</sup> Medical Authority such as the General Medical Council

<sup>2</sup> Type of obligation: 1. Legal; 2. Professional

<sup>3</sup> Potential consequences of non-compliance are: 1. Work supervised or suspension of license; 2. Suspension of license with possibility to restore license; 3. Financial sanctions; 4. No formal consequences / license for lifetime; 5. Follow-up.

1  
2  
3 265

4  
5 266 Information obtained from interviews confirmed information from documents with the  
6  
7 267 exception of handling of con-compliance: compared to the rules laid down in official  
8  
9 268 documents, interviewees reported a more lenient handling of con-compliance in practice.

10  
11 269

## 12 270 **2. Focus of the assessment**

13  
14  
15  
16 271 As regards focus, almost all recertification systems emphasized the lifelong learning of  
17  
18 272 doctors. Likewise, most systems relied on the collection of a minimum number of credits per  
19  
20 273 year, mostly 50 (N=5), where one credit typically represented one hour of learning activity.

21  
22 274 Although the three voluntary systems did not require credits to be earned for recertification,  
23  
24 275 one did recommend it (Denmark). Such practice was often embedded in a continuing  
25  
26 276 professional development framework as part of a voluntary recertification process. In  
27  
28 277 Hungary doctors must take a specific course followed by an exam. Generally, they received  
29  
30 278 more credits for courses if these were concluded with an examination. Of the countries that  
31  
32 279 assessed practice performance, only five did so through audits and appraisals or multi-source  
33  
34 280 feedback. Four countries evaluated doctors' individual and team functioning focusing on  
35  
36 281 communication and collaboration skills.

37  
38  
39 282

## 40 283 **3. Frequency of recertification**

41  
42 284 The frequency of recertification and timeframe within which requirements must be fulfilled  
43  
44 285 varied widely: some countries had annual appraisals (N=2), others three-year procedures  
45  
46 286 (N=2), but most of the countries undertook quinquennial assessments (N=5).

47  
48  
49 287

## 50 288 **4. Assessment methods**

51  
52  
53 289 To demonstrate their knowledge and engagement in lifelong learning, doctors in most  
54  
55  
56  
57  
58  
59  
60

1  
2  
3 290 countries must earn credits, for instance by participating in workshops and national or  
4  
5 291 international conferences, doing individual reading, teaching, writing scientific articles,  
6  
7 292 spending time as visiting doctor, and/or e-learning. Denmark assessed performance on the  
8  
9 293 basis of a dialog between employer and employee who jointly discussed learning needs. The  
10  
11 294 United Kingdom counted reflection on significant events, that is, unintended critical events  
12  
13 295 which potentially harmed the patient, to measure patient outcomes. Yet other countries (N=4)  
14  
15 296 used clinical audits, number of complaints, reviews or appraisals, and peer reviews to measure  
16  
17 297 processes of healthcare delivery. Finally, some countries deployed portfolios (N=6), clinical  
18  
19 298 audits (N=4), and multi-source feedback (N=4) to reflect on individual and team functioning.  
20  
21  
22  
23  
24

## 25 300 **5. Stakeholder involvement**

26  
27 301 In most cases (N=9), doctors decided which learning activities to take based on their self-  
28  
29 302 assessed learning needs. Several countries, however, also based the assessment of  
30  
31 303 performance outcomes and the process of care on feedback from peers (N=5) or patients  
32  
33 304 (N=2), yet only one country (The UK) demanded involving patients in the assessment  
34  
35 305 regularly.  
36  
37  
38  
39

## 40 307 **6. Synopsis**

41  
42 308 All things considered, what stood out was that most recertification systems relied heavily on  
43  
44 309 doctors' self-assessments, attached little weight to patient outcomes, patient involvement, and  
45  
46 310 the assessment of practice performance, as well as lacked an overarching competency  
47  
48 311 framework. Only four countries seem to match the content of assessment programs with  
49  
50 312 evaluation of professional practice. These findings clearly contrast with the aim to ensure  
51  
52 313 quality of care and patient safety most systems pursued. Evaluation of practice performance  
53  
54 314 seems to be a *sine qua non*, an indispensable condition, for assessment of competence, i.e.  
55  
56  
57  
58  
59

1  
2  
3 315 what doctors actually do in day-to-day practice. Two countries (the Netherlands and the UK),  
4  
5 316 however, did use a more comprehensive system, covering both self-assessment and practice  
6  
7 317 performance through multi-source feedback, including patients' feedback.  
8

9 318 Three other countries deserve mention for their apparent distinctness from the rest.  
10  
11 319 Denmark, though not formally requiring continuing professional development, assessed  
12  
13 320 practice performance based on an annual dialog between doctor and employer. This left little  
14  
15 321 room for individual doctors to self-assess their performance and independently decide on  
16  
17 322 activities to be taken, which was the case in all other countries where the individual doctor  
18  
19 323 was responsible for high-quality patient care. The systems in Spain and Portugal stood out as  
20  
21 324 being career-focused: they did not require doctors to engage in lifelong learning and  
22  
23 325 professional development for purposes of patient safety and quality patient care, but rather  
24  
25 326 encouraged the use of a portfolio to enhance chances of promotion.  
26  
27  
28

## 29 327 **DISCUSSION**

30  
31 328 The purpose of this study was to investigate how recertification is organized across different  
32  
33 329 countries. We found substantial differences in recertification requirements and procedures.  
34  
35 330 Moreover, these requirements in many respects seemed to conflict with aims to ensure quality  
36  
37 331 of care and patient safety.  
38  
39

40 332 First, we observed that only a few systems included feedback from patients in the  
41  
42 333 assessment. Involving patients in assessing quality of healthcare and doctor performance  
43  
44 334 seems inevitable for accountability and transparency purposes.<sup>40</sup> Although many patients are  
45  
46 335 needed to obtain reliable evaluations, their involvement in recertification procedures can help  
47  
48 336 respond to public calls for doctors' accountability.<sup>9</sup> Wright et al recommend including data  
49  
50 337 from 34 patient questionnaires and 15 colleague questionnaires to obtain reliable performance  
51  
52 338 evaluation for appraisal purposes.<sup>41</sup> Despite the fact that the literature reports peers to give  
53  
54 339 accurate, credible, and valid assessments of performance, peer feedback was absent in most  
55  
56  
57  
58  
59

1  
2  
3 340 systems investigated but is for example employed in some Canadian provinces.<sup>9 14 42 43</sup> Use of  
4  
5 341 multi-source feedback to assess practice performance, requires high quality and credible  
6  
7 342 feedback to induce reflection on practice.<sup>44</sup> Multi-source feedback, including patients'  
8  
9 343 feedback, can be especially effective when the feedback received contrasts with individual  
10  
11 344 perceptions and is facilitated by a mentor or coach.<sup>45</sup> A mentor can help to deal with the  
12  
13 345 emotional aspects of the multi-source feedback and to structure individual reflection and  
14  
15 346 follow-up.<sup>46</sup> Use of multisource feedback and mentoring systems could thus help countries  
16  
17 347 transitioning from a system based on self-assessments to "directed" self-assessments as  
18  
19 348 suggested by Sargeant et al.<sup>47</sup>

22 349 Second, most systems relied on self-assessments and lifelong learning activities  
23  
24 350 doctors selected themselves without attending to external assessment of practice performance.  
25  
26 351 More specifically, by relying on credit accumulation systems that allowed doctors to choose  
27  
28 352 their learning activities,<sup>48</sup> it was entirely at the doctors' discretion to judge their performance  
29  
30 353 and learning needs. There's strong evidence however, that several individual and social  
31  
32 354 factors obscure the validity of self-assessments such as age and experience.<sup>48 49</sup> Additionally,  
33  
34 355 self-assessments tend to mirror self-confidence and self-efficacy which are not necessarily  
35  
36 356 good measures of doctors' competence.<sup>48</sup> This evidence provides ample ground to question  
37  
38 357 both the effectiveness of recertification systems that rely on doctors' self-assessments and the  
39  
40 358 autonomy granted to clinicians.<sup>17 50</sup> Hence, assessments of competence will become more  
41  
42 359 meaningful when they involve multiple assessors, including patients.

46 360 Another deviation from the purpose of recertification constituted the assessment  
47  
48 361 methods used. Whereas activities such as reading written materials, and attending conferences  
49  
50 362 or presentations have been shown to deepen specific knowledge, there is no evidence that  
51  
52 363 such didactic and passive learning interventions alone improve performance and patient  
53  
54 364 outcomes.<sup>51-53</sup> A causal link between educational activities and improved patient health status

1  
2  
3 365 yet remains to be established.<sup>54</sup> This casts doubt on the impact of the recertification systems in  
4  
5 366 our study on doctors' performance. Consequently, our findings reinforce concerns about the  
6  
7 367 validity of recertification procedures and emphasize the need to combine various assessment  
8  
9 368 methods, likely resulting in greater accountability as previously been proven.<sup>55</sup> As stated by  
10  
11 369 Forsetlund and colleagues (2009), a combination of multiple media, multiple instructional  
12  
13 370 techniques and multiple exposures can help to induce change in performance towards  
14  
15 371 improved patient outcomes.<sup>56</sup>

16  
17  
18 372 Other non-European countries have experienced similar challenges in implementing  
19  
20 373 adequate assessment methods for recertification purposes.<sup>4 43 57 58</sup> Also Australia, the USA and  
21  
22 374 Canada investigate new methods to evaluate competence and practice performance, cautiously  
23  
24 375 moving away from self-assessment.<sup>4 43 58</sup>

25  
26  
27 376 Since medical specialists invest substantial time and money in their professional  
28  
29 377 development, the feasibility, applicability, and acceptability of recertification are topics worth  
30  
31 378 exploring in the context of quality assurance. We therefore invite future studies into  
32  
33 379 stakeholders' perceptions of recertification and their effectiveness and impact,<sup>59</sup> and also to  
34  
35 380 bring into focus the content and formal aspects of learning activities which, by facilitating its  
36  
37 381 design and implementation, may improve recertification. To shed light on the full picture, we  
38  
39 382 would furthermore welcome studies investigating the feasibility and acceptability of involving  
40  
41 383 patients in evaluating physicians' competency.

#### 42 43 44 45 384 **Limitations**

46  
47 385 Since recertification systems were decentralized in some countries and we explored the  
48  
49 386 national level only, we cannot exclude that interregional variations were missed. Moreover,  
50  
51 387 although the interviewees ideally represented at least two different national organizations,  
52  
53 388 interviews were mostly limited to two or three respondents per country. A final and possibly  
54  
55 389 the most complex and intervening limitation constituted the diversity in terminology and

1  
2  
3 390 language. This may have affected the translation of national concepts into English during the  
4  
5 391 interviews and of written descriptions, potentially causing loss of detail during the analyses.  
6  
7 392 These language differences and ambiguity in terms underline the challenge of comparing  
8  
9 393 various recertification systems.  
10

### 11 12 394 **Practical implications for professional mobility**

13  
14 395 Defining universal criteria for assessing professional competence will be no easy feat,  
15  
16 396 especially not when considering the differences between national recertification approaches,  
17  
18 397 rising cross-border mobility. Since each system is customized to a specific context, culture,  
19  
20 398 and healthcare system, a universal recertification system may neither be desirable nor  
21  
22 399 achievable, as doctors are required to consciously reflect on the local culture, and adapt to the  
23  
24 400 unique features of their work setting and health care system.<sup>16</sup> To our knowledge, currently  
25  
26 401 there is no requirement or overarching effort in striving towards harmonising recertification  
27  
28 402 processes across countries within the European Union. Its member states have agreed that  
29  
30 403 each individual country will remain responsible for national health care affairs, without  
31  
32 404 European regulations interfering. Moving towards a standardised system would however  
33  
34 405 require an EU-wide regulation, which is currently interrupted by those strong nationally  
35  
36 406 regulatory powers. For transparency purposes, however, national bodies and medical societies  
37  
38 407 could share their competency assessment procedures and quality standards, turning a political  
39  
40 408 matter into an educational (and quality assurance) matter.<sup>8</sup> Moreover, national bodies can  
41  
42 409 incorporate performance evaluation, involve multiple stakeholders including patients, and use  
43  
44 410 other assessments besides clinicians' self-assessments in their re-certification procedures to  
45  
46 411 enhance liability.<sup>60</sup> Considering the increasing internationalisation of healthcare, doctors'  
47  
48 412 cultural competency should also be incorporated into recertification programmes.  
49  
50  
51  
52

53 413 Achieving an overarching quality assurance system being an unrealistic goal, we need  
54  
55 414 to have a shared understanding of what are minimum standards for a doctor<sup>50</sup> thereby creating  
56  
57  
58  
59  
60

1  
2  
3 415 a base for international comparison while allowing for local adaptations. This however asks  
4  
5 416 for an increased collaboration between countries and understanding of differences inherent to  
6  
7 417 each system and culture. Such standards of training content and certification directives could  
8  
9 418 meet the challenges posed by the free, cross-border movement of professionals, improving  
10  
11 419 patient safety, and enhancing accountability and transparency.

## 14 420 **Conclusion**

15  
16 421 Recertification can help assess and improve knowledge, skills, professional performance, and,  
17  
18 422 ultimately, patient outcomes. Yet, systems vary widely across countries in terms of being  
19  
20 423 compulsory or not, requirements, patient involvement, and consequences of compliance or  
21  
22 424 non-compliance. A shift toward a broader program of assessment focused on competence  
23  
24 425 assessment and lifelong learning might create a more valid, credible, and reliable basis for  
25  
26 426 recertification, meeting growing demands for accountability and transparency.  
27  
28  
29

30 427  
31  
32 428 Acknowledgements: We would like to thank Professor Dame Lesley Southgate, FRCGP,  
33  
34 429 FRCP, MClin, Sci, for contributing to this manuscript with discussing the study design and  
35  
36 430 suggesting possible interview partners. Angelique van den Heuvel provided help in form of  
37  
38 431 language editing, which we highly appreciated. Furthermore, we would like to thank all  
39  
40 432 interviewees for their contribution.  
41  
42

43 433  
44  
45 434 Contributors: CS wrote the research plan, collected, cleaned and analysed the data, and  
46  
47 435 drafted and revised the paper. She is guarantor. All authors were involved with  
48  
49 436 conceptualizing the research. MG analysed the data, and drafted and revised the paper. SM  
50  
51 437 revised the paper. GR drafted and revised the paper. FS drafted and revised the paper. ED  
52  
53 438 analysed the data, drafted and revised the draft paper.  
54  
55

56 439  
57  
58  
59  
60



1  
2  
3 440 Funding statement: Carolin Sehlbach is a PhD student at Maastricht University, on a project  
4  
5 441 funded by the European Respiratory Society. The research conducted by Carolin Sehlbach is  
6  
7 442 however independent from this funding.  
8

9  
10 443

11 444 Competing interests: None declared. All authors have completed the *Unified Competing*  
12  
13 445 *Interest* form (available on request from the corresponding author).  
14  
15

16 446

17  
18 447 Ethical Approval: Ethical approval was obtained from the Netherlands Association for  
19  
20 448 Medical Education (NVMO; file number 669).  
21

22 449

23  
24 450 Data sharing: The dataset(s) supporting the conclusions of this article is available from the  
25  
26 451 author upon request by emailing the corresponding author.  
27  
28

29 452

30  
31 453 Transparency declaration: Carolin Sehlbach affirms that the manuscript is an honest, accurate,  
32  
33 454 and transparent account of the study being reported; that no important aspects of the study  
34  
35 455 have been omitted; and that any discrepancies from the study as planned (and, if relevant,  
36  
37 456 registered) have been explained.  
38

457 **REFERENCES**

- 458 1. Peck C, McCall M, McLaren B, et al. Continuing medical education and continuing professional  
459 development: international comparisons. *BMJ* 2000;320(7232):432-35. doi:  
460 10.1136/bmj.320.7232.432
- 461 2. Horsley T, Grimshaw J, Campbell C. Maintaining the competence of Europe's workforce. *BMJ* 2010;341  
462 doi: 10.1136/bmj.c4687
- 463 3. Ahmed K, Khan RS, Darzi A, et al. Recertification: What do specialists think about skill assessment?  
464 *Surgeon* 2013;11(3):120-24. doi: <http://dx.doi.org/10.1016/j.surge.2012.12.004>
- 465 4. Shaw K, Cassel CK, Black C, et al. Shared medical regulation in a time of increasing calls for  
466 accountability and transparency: Comparison of recertification in the United States, Canada, and the  
467 United Kingdom. *JAMA* 2009;302(18):2008-14. doi: 10.1001/jama.2009.1620
- 468 5. Bach S. International migration of health workers: Labour and social issues. In: Office IL, ed. Geneva,  
469 2003.
- 470 6. Choudhry NK, Fletcher RH, Soumerai SB. Systematic Review: The Relationship between Clinical  
471 Experience and Quality of Health Care. *Ann Intern Med* 2005;142(4):260-73. doi: 10.7326/0003-  
472 4819-142-4-200502150-00008
- 473 7. Ahmed K, Wang TT, Ashrafian H, et al. The effectiveness of continuing medical education for specialist  
474 recertification. *Can Urol Assoc J* 2013;7(7-8):266-72. doi: 10.5489/cuaj.378 [published Online First:  
475 2013/09/14]
- 476 8. Boulet J, van Zanten M. Ensuring high-quality patient care: the role of accreditation, licensure, specialty  
477 certification and revalidation in medicine. *Med Educ* 2014;48(1):75-86. doi: 10.1111/medu.12286  
478 [published Online First: 2013/12/18]
- 479 9. Norcini J, Anderson B, Bollela V, et al. Criteria for good assessment: Consensus statement and  
480 recommendations from the Ottawa 2010 Conference. *Med Teach* 2011;33(3):206-14. doi:  
481 10.3109/0142159X.2011.551559
- 482 10. Brightwell A, Grant J. Competency-based training: who benefits? *Postgrad Med J* 2013;89(1048):107-10.  
483 doi: 10.1136/postgradmedj-2012-130881
- 484 11. Frank JR, Snell LS, Cate OT, et al. Competency-based medical education: theory to practice. *Med Teach*  
485 2010;32(8):638-45. doi: 10.3109/0142159X.2010.501190
- 486 12. Iobst WF, Sherbino J, Cate OT, et al. Competency-based medical education in postgraduate medical  
487 education. *Med Teach* 2010;32(8):651-56. doi: 10.3109/0142159x.2010.500709
- 488 13. Mulder H, Cate OT, Daalder R, et al. Building a competency-based workplace curriculum around  
489 entrustable professional activities: the case of physician assistant training. *Med Teach*  
490 2010;32(10):e453-e59. doi: 10.3109/0142159x.2010.513719
- 491 14. Epstein RM, Hundert EM. Defining and assessing professional competence. *JAMA* 2002;287(2):226-35.  
492 doi: 10.1001/jama.287.2.226
- 493 15. Frank JR. The CanMEDS 2005 physician competency framework: Better standards, better physicians,  
494 better care: Royal College of Physicians and Surgeons of Canada 2005.
- 495 16. Kumagai AK, Lypton ML. Beyond Cultural Competence: Critical Consciousness, Social Justice, and  
496 Multicultural Education. *Acad Med* 2009;84(6):782-87. doi: 10.1097/ACM.0b013e3181a42398
- 497 17. Epstein RM. Assessment in Medical Education. *N Engl J Med* 2007;356(4):387-96. doi:  
498 doi:10.1056/NEJMra054784
- 499 18. Horowitz SD. Invited Article: Maintenance of certification: the next phase in assessing and improving  
500 physician performance. *Neurology* 2008;71(8):605-9. doi: 10.1212/01.wnl.0000323936.44568.a6
- 501 19. Lipner RS, Hess BJ, Phillips RL. Specialty Board Certification in the United States: Issues and Evidence.  
502 *J Contin Educ Health Prof* 2013;33(S1):S20-S35. doi: 10.1002/chp.21203
- 503 20. Miller GE. The assessment of clinical skills/competence/performance. *Acad Med* 1990;65(9):S63-7. doi:  
504 10.1097/00001888-199009000-00045
- 505 21. Jamtvedt G, Young JM, Kristoffersen DT, O'Brien MA, Oxman AD. Audit and feedback: effects on  
506 professional practice and health care outcomes (Review). *Cochrane Libr* 2007(4) doi:  
507 10.1002/14651858.CD000259.pub3
- 508 22. Ivers N, Jamtvedt G, Flottorp S, et al. Audit and feedback: effects on professional practice and healthcare

- 1  
2  
3  
4 509 outcomes. *Cochrane Database Syst Rev* 2012(6):Cd000259. doi: 10.1002/14651858.CD000259.pub3  
5 510 [published Online First: 2012/06/15]  
6 511 23. Godlee F. European countries need to work together. *BMJ* 2010;341 doi: 10.1136/bmj.c5395  
7 512 24. Aiken L, Bidwell P, Brugha R, et al. Health professional mobility in a changing Europe: new dynamics,  
8 513 mobile individuals and diverse responses: The European Observatory on Health Systems and  
9 514 Policies 2014.  
10 515 25. Simões J AG, Fronteira I, Hernández-Quevedo C. Portugal: Health system review. *Health Syst Transit:*  
11 516 *The European Observatory on Health Systems and Policies*, 2017.  
12 517 26. Jakubowski E, Busse R. Health Care Systems in the EU - a comparative study. In: Chambers GR, ed.  
13 518 Luxembourg: European Parliament, 1998.  
14 519 27. Jacobs R, Goddard M. Social health insurance systems in European countries: the role of the insurer in the  
15 520 health care system: a comparative study of four European countries, 2000.  
16 521 28. Mossialos E, Wenzl M, Osborn R, et al. International profiles of health care systems, 2014. New York,  
17 522 NY: The Commonwealth Fund, 2015.  
18 523 29. Cylus J RE, Findley L, Longley M, O'Neill C, Steel D. United Kingdom: Health system review. In: Busse  
19 524 R, Figueras J, McKee M, et al., eds. *Health Syst Transit: The European Observatory on Health*  
20 525 *Systems and Policies*, 2015.  
21 526 30. McDaid D WM, Maresso A and Mossialos E. Ireland: Health system review. In: Busse R, Figueras J,  
22 527 McKee M, et al., eds. *Health Syst Transit: The European Observatory on Health Systems and*  
23 528 *Policies*, 2009.  
24 529 31. Sagan A, Panteli D, Borkowski W, et al. Poland: Health system review. In: Busse R, Figueras J, McKee  
25 530 M, et al., eds. *Health Syst Transit: The European Observatory on Health Systems and Policies*  
26 531 *2011:1-193*.  
27 532 32. Garcia-Armesto S, Abadía-Taira M, Durán A, et al. Spain: Health system review. In: Busse R, Figueras J,  
28 533 McKee M, et al., eds. *Health Syst Transit: The European Observatory on Health Systems and*  
29 534 *Policies*, 2010:1-295.  
30 535 33. Gaal P, Szigeti S, Csere M, et al. Hungary: Health system review. In: Busse R, Figueras J, McKee M, et  
31 536 al., eds. *Health Syst Transit*, 2011:1-266.  
32 537 34. Net migration rate: IndexMundi; 2014 [Available from: <http://www.indexmundi.com/g/r.aspx?v=27>  
33 538 accessed 14th July 2016].  
34 539 35. Health Workforce Migration: Migration of doctors 2017 [cited 2017 13th December]. Available from:  
35 540 <http://stats.oecd.org/Index.aspx?QueryId=68336#> accessed 13th December 2017.  
36 541 36. Estatísticas por País de Formacao 2016 2016 [Available from: [http://ordemosmedicos.pt/wp-](http://ordemosmedicos.pt/wp-content/uploads/2017/09/Estatisticas_por_Pa%C3%ADs_de_Formacao_2016.pdf)  
37 542 [content/uploads/2017/09/Estatisticas\\_por\\_Pa%C3%ADs\\_de\\_Formacao\\_2016.pdf](http://ordemosmedicos.pt/wp-content/uploads/2017/09/Estatisticas_por_Pa%C3%ADs_de_Formacao_2016.pdf) accessed 13th  
38 543 December 2017].  
39 544 37. European Commission. Study concerning the review and mapping of continuous professional  
40 545 development and lifelong learning for health professionals in the EU In: 2008-2013 EHP, ed.:  
41 546 European Commission, 2015.  
42 547 38. Grimshaw JM, Shirran L, Thomas R, et al. Changing provider behavior: an overview of systematic  
43 548 reviews of interventions. *Medical care* 2001;39(8 Suppl 2):Ii2-45. [published Online First:  
44 549 2001/10/05]  
45 550 39. Iglehart JK, Baron RB. Ensuring Physicians' Competence — Is Maintenance of Certification the Answer?  
46 551 *N Engl J Med* 2012;367(26):2543-49. doi: 10.1056/NEJMhpr1211043  
47 552 40. Van Der Wees PJ, Nijhuis-Van Der Sanden MWG, Ayanian JZ, et al. Integrating the Use of Patient-  
48 553 Reported Outcomes for Both Clinical Practice and Performance Measurement: Views of Experts  
49 554 from 3 Countries. *Milbank Q* 2014;92(4):754-75. doi: 10.1111/1468-0009.12091  
50 555 41. Wright C, Richards SH, Hill JJ, et al. Multisource Feedback in Evaluating the Performance of Doctors:  
51 556 The Example of the UK General Medical Council Patient and Colleague Questionnaires. *Acad Med*  
52 557 2012;87(12):1668-78. doi: 10.1097/ACM.0b013e3182724cc0  
53 558 42. Cervero RM, Gaines JK. The impact of CME on physician performance and patient health outcomes: an  
54 559 updated synthesis of systematic reviews. *J Contin Educ Health Prof* 2015;35(2):131-8. doi:  
55 560 10.1002/chp.21290 [published Online First: 2015/06/27]  
56 561 43. Dauphinee WD. An International Review of the Recertification and Revalidation of Physicians. In:  
57 562 McGaghie WC, Suker JR, eds. *International Best Practices for Evaluation in the Health Professions*.

- 1  
2  
3  
4 563 London: Radcliffe Publishing 2013:284-86.
- 5 564 44. Ferguson J, Wakeling J, Bowie P. Factors influencing the effectiveness of multisource feedback in  
6 565 improving the professional practice of medical doctors: a systematic review. *BMC Med Educ*  
7 566 2014;14(1):76. doi: 10.1186/1472-6920-14-76
- 8 567 45. Sargeant JM, Mann KV, van der Vleuten CP, et al. Reflection: a link between receiving and using  
9 568 assessment feedback. *Adv Health Sci Educ Theory Pract* 2009;14(3):399-410. doi: 10.1007/s10459-  
10 569 008-9124-4 [published Online First: 2008/06/06]
- 11 570 46. Driessen EW OK. Mentoring. In: K W, ed. Oxford textbook of medical education. London: Oxford  
12 571 University Press 2013:265-84.
- 13 572 47. Sargeant J, Mann K, van der Vleuten C, et al. "Directed" self-assessment: Practice and feedback within a  
14 573 social context. *J Contin Educ Health Prof* 2008;28(1):47-54. doi: 10.1002/chp.155
- 15 574 48. Davis DA, Mazmanian PE, Fordis M, et al. Accuracy of physician self-assessment compared with  
16 575 observed measures of competence: A systematic review. *JAMA* 2006;296(9):1094-102. doi:  
17 576 10.1001/jama.296.9.1094
- 18 577 49. Violato C, Lockyer J. Self and Peer Assessment of Pediatricians, Psychiatrists and Medicine Specialists:  
19 578 Implications for Self-Directed Learning. *Adv Health Sci Educ Theory Pract* 2006;11(3):235-44. doi:  
20 579 10.1007/s10459-005-5639-0
- 21 580 50. Schuwirth LW, Southgate L, Page GG, et al. When enough is enough: a conceptual basis for fair and  
22 581 defensible practice performance assessment. *Med Educ* 2002;36(10):925-30. [published Online First:  
23 582 2002/10/23]
- 24 583 51. Davis D, O'Brien MA, Freemantle N, et al. Impact of formal continuing medical education: do  
25 584 conferences, workshops, rounds, and other traditional continuing education activities change  
26 585 physician behavior or health care outcomes? *JAMA* 1999;282(9):867-74. doi:  
27 586 10.1001/jama.282.9.867 [published Online First: 1999/09/09]
- 28 587 52. Khan KS, Coomarasamy A. A hierarchy of effective teaching and learning to acquire competence in  
29 588 evidenced-based medicine. *BMC Med Educ* 2006;6:59-59. doi: 10.1186/1472-6920-6-59
- 30 589 53. Grant J. The good CPD guide. A practical guide to managed continuing professional development in  
31 590 medicine. 2nd ed. London: New York Radcliffe Publishing 2011.
- 32 591 54. Moore DE, Jr., Green JS, Gallis HA. Achieving desired results and improved outcomes: integrating  
33 592 planning and assessment throughout learning activities. *J Contin Educ Health Prof* 2009;29(1):1-15.  
34 593 doi: 10.1002/chp.20001 [published Online First: 2009/03/17]
- 35 594 55. Davis D, Galbraith R. Continuing medical education effect on practice performance: effectiveness of  
36 595 continuing medical education: American College of Chest Physicians Evidence-Based Educational  
37 596 Guidelines. *Chest* 2009;135(3 Suppl):42s-48s. doi: 10.1378/chest.08-2517 [published Online First:  
38 597 2009/03/20]
- 39 598 56. Forsetlund L, Bjorndal A, Rashidian A, et al. Continuing education meetings and workshops: effects on  
40 599 professional practice and health care outcomes. *Cochrane Database Syst Rev* 2009(2):Cd003030.  
41 600 doi: 10.1002/14651858.CD003030.pub2 [published Online First: 2009/04/17]
- 42 601 57. Newble D, Paget N, McLaren B. Revalidation in Australia and New Zealand: approach of Royal  
43 602 Australasian College of Physicians. *BMJ* 1999;319(7218):1185-88.
- 44 603 58. Drazen JM, Weinstein DF. Considering Recertification. *New Engl J Med* 2010;362(10):946-47. doi:  
45 604 10.1056/NEJMe1000174
- 46 605 59. Cook DA, Blachman MJ, West CP, et al. Physician Attitudes About Maintenance of Certification. *Mayo*  
47 606 *Clin Proc* 2016;91(10):1336-45. doi: 10.1016/j.mayocp.2016.07.004
- 48 607 60. Irvine D. Patients, professionalism, and revalidation. *BMJ* 2005;330(7502):1265-68. doi:  
49 608 10.1136/bmj.330.7502.1265  
50  
51  
52  
53  
54  
55  
56  
57  
58  
59  
60

## COREQ (CONsolidated criteria for REporting Qualitative research) Checklist

A checklist of items that should be included in reports of qualitative research. You must report the page number in your manuscript where you consider each of the items listed in this checklist. If you have not included this information, either revise your manuscript accordingly before submitting or note N/A.

| Topic                                          | Item No. | Guide Questions/Description                                                                                                                              | Reported on Page No. |
|------------------------------------------------|----------|----------------------------------------------------------------------------------------------------------------------------------------------------------|----------------------|
| <b>Domain 1: Research team and reflexivity</b> |          |                                                                                                                                                          |                      |
| <i>Personal characteristics</i>                |          |                                                                                                                                                          |                      |
| Interviewer/facilitator                        | 1        | Which author/s conducted the interview or focus group?                                                                                                   |                      |
| Credentials                                    | 2        | What were the researcher's credentials? E.g. PhD, MD                                                                                                     |                      |
| Occupation                                     | 3        | What was their occupation at the time of the study?                                                                                                      |                      |
| Gender                                         | 4        | Was the researcher male or female?                                                                                                                       |                      |
| Experience and training                        | 5        | What experience or training did the researcher have?                                                                                                     |                      |
| <i>Relationship with participants</i>          |          |                                                                                                                                                          |                      |
| Relationship established                       | 6        | Was a relationship established prior to study commencement?                                                                                              |                      |
| Participant knowledge of the interviewer       | 7        | What did the participants know about the researcher? e.g. personal goals, reasons for doing the research                                                 |                      |
| Interviewer characteristics                    | 8        | What characteristics were reported about the interviewer/facilitator? e.g. Bias, assumptions, reasons and interests in the research topic                |                      |
| <b>Domain 2: Study design</b>                  |          |                                                                                                                                                          |                      |
| <i>Theoretical framework</i>                   |          |                                                                                                                                                          |                      |
| Methodological orientation and Theory          | 9        | What methodological orientation was stated to underpin the study? e.g. grounded theory, discourse analysis, ethnography, phenomenology, content analysis |                      |
| <i>Participant selection</i>                   |          |                                                                                                                                                          |                      |
| Sampling                                       | 10       | How were participants selected? e.g. purposive, convenience, consecutive, snowball                                                                       |                      |
| Method of approach                             | 11       | How were participants approached? e.g. face-to-face, telephone, mail, email                                                                              |                      |
| Sample size                                    | 12       | How many participants were in the study?                                                                                                                 |                      |
| Non-participation                              | 13       | How many people refused to participate or dropped out? Reasons?                                                                                          |                      |
| <i>Setting</i>                                 |          |                                                                                                                                                          |                      |
| Setting of data collection                     | 14       | Where was the data collected? e.g. home, clinic, workplace                                                                                               |                      |
| Presence of non-participants                   | 15       | Was anyone else present besides the participants and researchers?                                                                                        |                      |
| Description of sample                          | 16       | What are the important characteristics of the sample? e.g. demographic data, date                                                                        |                      |
| <i>Data collection</i>                         |          |                                                                                                                                                          |                      |
| Interview guide                                | 17       | Were questions, prompts, guides provided by the authors? Was it pilot tested?                                                                            |                      |
| Repeat interviews                              | 18       | Were repeat interviews carried out? If yes, how many?                                                                                                    |                      |
| Audio/visual recording                         | 19       | Did the research use audio or visual recording to collect the data?                                                                                      |                      |
| Field notes                                    | 20       | Were field notes made during and/or after the interview or focus group?                                                                                  |                      |
| Duration                                       | 21       | What was the duration of the interviews or focus group?                                                                                                  |                      |
| Data saturation                                | 22       | Was data saturation discussed?                                                                                                                           |                      |
| Transcripts returned                           | 23       | Were transcripts returned to participants for comment and/or                                                                                             |                      |

| Topic                                  | Item No. | Guide Questions/Description                                                                                                        | Reported on Page No. |
|----------------------------------------|----------|------------------------------------------------------------------------------------------------------------------------------------|----------------------|
|                                        |          | correction?                                                                                                                        |                      |
| <b>Domain 3: analysis and findings</b> |          |                                                                                                                                    |                      |
| <i>Data analysis</i>                   |          |                                                                                                                                    |                      |
| Number of data coders                  | 24       | How many data coders coded the data?                                                                                               |                      |
| Description of the coding tree         | 25       | Did authors provide a description of the coding tree?                                                                              |                      |
| Derivation of themes                   | 26       | Were themes identified in advance or derived from the data?                                                                        |                      |
| Software                               | 27       | What software, if applicable, was used to manage the data?                                                                         |                      |
| Participant checking                   | 28       | Did participants provide feedback on the findings?                                                                                 |                      |
| <i>Reporting</i>                       |          |                                                                                                                                    |                      |
| Quotations presented                   | 29       | Were participant quotations presented to illustrate the themes/findings?<br>Was each quotation identified? e.g. participant number |                      |
| Data and findings consistent           | 30       | Was there consistency between the data presented and the findings?                                                                 |                      |
| Clarity of major themes                | 31       | Were major themes clearly presented in the findings?                                                                               |                      |
| Clarity of minor themes                | 32       | Is there a description of diverse cases or discussion of minor themes?                                                             |                      |

Developed from: Tong A, Sainsbury P, Craig J. Consolidated criteria for reporting qualitative research (COREQ): a 32-item checklist for interviews and focus groups. *International Journal for Quality in Health Care*. 2007. Volume 19, Number 6: pp. 349 – 357

**Once you have completed this checklist, please save a copy and upload it as part of your submission. DO NOT include this checklist as part of the main manuscript document. It must be uploaded as a separate file.**
